# Supplementary material for: Thiamyxins: Structure and Biosynthesis of Myxobacterial RNA‐Virus Inhibitors
Source: PubMed Central journal article supplement (PMC10100342; doi:10.1002/anie.202212946), 2022-11-28
Supplement: ANIE-61-0-s001.pdf [file ANIE-61-0-s001.pdf]

## Supporting Information

### **Thiamyxins: Structure and Biosynthesis of Myxobacterial RNA-Virus Inhibitors**

*P. A. Haack, K. Harmrolfs, C. D. Bader, R. Garcia, A. P. Gunesch, S. Haid, A. Popoff, A. Voltz, H. Kim, R. Bartenschlager, T. Pietschmann, R. Müller\**

## Contents

|       |                                                                                    |    |
|-------|------------------------------------------------------------------------------------|----|
| 1.    | General Experimental Procedures and Materials .....                                | 4  |
| 1.1   | Isolation and cultivation of MCy9487 .....                                         | 4  |
| 1.2   | Isolation of the thiamyxins .....                                                  | 4  |
| 1.3   | LC-MS systems.....                                                                 | 4  |
| 1.3.1 | LC-MS system 1a – standard analytical measurements.....                            | 5  |
| 1.3.2 | LC-MS system 1b – Marfey's Method .....                                            | 5  |
| 1.3.3 | LC-MS system 1c – adapted Marfey's Method for improved separation of isoleucins .. | 5  |
| 1.3.4 | LC-MS system 2 – semi-preparative purification .....                               | 5  |
| 1.4   | NMR measurements.....                                                              | 6  |
| 1.5   | Feeding experiments .....                                                          | 6  |
| 1.6   | Biological assays .....                                                            | 7  |
| 1.6.1 | Screening with hCoV-229E-luc reporter virus .....                                  | 7  |
| 1.6.2 | Screening with dengue and Zika virus .....                                         | 7  |
| 2.    | Supporting Data.....                                                               | 8  |
| 2.1   | Bioactivity data of MCy9487 crude extract.....                                     | 8  |
| 2.2   | NMR-based structure elucidation .....                                              | 8  |
| 2.3   | Stereochemistry assignment .....                                                   | 14 |
| 2.3.1 | N-methyl-valine assignment.....                                                    | 14 |
| 2.3.2 | Isoleucine assignment .....                                                        | 15 |
| 2.3.3 | Thiazoline assignment .....                                                        | 18 |
| 2.3.4 | Stability of thiamyxin A.....                                                      | 18 |
| 2.4   | Gene cluster organization and proposed biosynthesis .....                          | 19 |
| 2.4.1 | Active site residues of module 5 ( <i>thiC</i> ).....                              | 21 |
| 2.4.2 | Active site residues of orf 5 .....                                                | 21 |
| 2.4.3 | Dimerization domain in <i>thiA</i> .....                                           | 22 |
| 2.4.4 | Alignment of GNAT Domains.....                                                     | 23 |
| 2.4.5 | Phylogenetic analysis of C domains.....                                            | 24 |
| 2.5   | Feeding Experiments .....                                                          | 24 |

|       |                               |    |
|-------|-------------------------------|----|
| 2.6   | Antimicrobial activities..... | 26 |
| 2.7   | Antiviral activities.....     | 26 |
| 2.8   | NMR data.....                 | 30 |
| 2.8.1 | Thiamyxin B.....              | 30 |
| 2.8.2 | Thiamyxin A.....              | 38 |
| 2.8.3 | Thiamyxin C.....              | 45 |
| 2.8.4 | Thiamyxin D.....              | 53 |
| 3     | References.....               | 60 |

# 1. General Experimental Procedures and Materials

## 1.1 Isolation and cultivation of MCy9487

The myxobacterial strain MCy9487 was isolated at the hillside of Saarland University Campus, Saarbrücken, Germany in January 2011 from a soil sample with leaf litters and other decaying plant materials. The strain was recognized on a standard mineral salts agar isolation medium for transparent swarming and whitish fruiting bodies appearing as mounds- and horn-like shapes. Phylogenetic analysis based on 16S rRNA gene sequence revealed the strain's distinct position within the *Myxococcus-Pyxidicoccus-Coralloccoccus* clade which shows 98.62 – 98.68% similarity with *Coralloccoccus coralloides* strain M2<sup>T</sup> (GenBank accession: NR\_042329) and *C. exiguus* strain Cc e167<sup>T</sup> (GenBank accession: NR\_042330), respectively. The detailed and valid strain description will be published in a separate taxonomic manuscript.

The fermentation was performed in 30 L VY/2S medium (g/L, w/v: 0.5% commercial fresh Baker's yeast, 0.01% CaCl<sub>2</sub> · 2H<sub>2</sub>O, 0.2% HEPES, 0.5% soluble starch (Roth), pH 7.2, adjusted with KOH before autoclaving) supplemented with 2% (v/v) amberlite resin XAD-16 (Sigma). The cultivation was maintained under rotary shaking condition (160 r.p.m., 30°C, 10d). At the end of cultivation, the cells and resins were harvested together by centrifugation (8,000 r.p.m. 30mins, 4°C).

## 1.2 Isolation of the thiamyxins

The cell pellet and resin were extracted three times with methanol and dried using a rotary evaporator. The extract was then resolved in Methanol : H<sub>2</sub>O (60:40) and extracted with hexane. The methanol was then removed by rotary evaporation and the remaining aqueous layer was extracted with chloroform. All four compounds were found in the chloroform partition, which was then dried, resolved in methanol and the compounds were purified using LC-MS system 2.

## 1.3 LC-MS systems

All analytical LC-MS measurements were performed on a Dionex Ultimate 3000 RSLC system using a BEH C18, 100 x 2.1 mm, 1.7 μm dp column (Waters, Germany), coupled to a maXis 4G hr-ToF mass spectrometer (Bruker Daltonics, Germany) using the Apollo ESI source. UV spectra were recorded by a DAD in the range from 200 to 600 nm. The LC flow was split to 75 μL/min before entering the mass spectrometer. The LC-MS data was analyzed using Bruker DataAnalysis version 4.2.

### 1.3.1 LC-MS system 1a – standard analytical measurements

Separation of 1  $\mu\text{L}$  sample was achieved by a linear gradient from (A)  $\text{H}_2\text{O} + 0.1\% \text{FA}$  to (B)  $\text{ACN} + 0.1\% \text{FA}$  at a flow rate of 600  $\mu\text{L}/\text{min}$  and 45  $^\circ\text{C}$ . The gradient was initiated by a 0.5 min isocratic step at 5% B, followed by an increase to 95% B in 18 min to end up with a 2 min step at 95% B before reequilibration under the initial conditions. Mass spectra were acquired in centroid mode ranging from 150 – 2500  $m/z$  at a 2 Hz scan rate.

### 1.3.2 LC-MS system 1b – Marfey's Method

Separation of 1  $\mu\text{L}$  sample was achieved by a gradient from (A)  $\text{H}_2\text{O} + 0.1\% \text{FA}$  to (B)  $\text{ACN} + 0.1\% \text{FA}$  at a flow rate of 600  $\mu\text{L}/\text{min}$  and 45  $^\circ\text{C}$ . The gradient was as follows: Ramp in 1 min from 5% B to 10% B, in 14 min to 35% B, in 7 min to 55% B and in 3 min to 80% B. This is followed by a 1 min step at 80% B before reequilibration with the initial conditions. Mass spectra were acquired in centroid mode ranging from 250 – 3000  $m/z$  at a 2 Hz scan rate.

### 1.3.3 LC-MS system 1c – adapted Marfey's Method for improved separation of isoleucins

Separation of 1  $\mu\text{L}$  sample was achieved by a gradient from (A)  $\text{H}_2\text{O} + 0.1\% \text{FA}$  to (B)  $\text{ACN} + 0.1\% \text{FA}$  at a flow rate of 600  $\mu\text{L}/\text{min}$  and 45  $^\circ\text{C}$ . The gradient was as follows: Ramp in 1 min from 5% B to 27% B, in 37 min to 45% B and in 1 min to 80% B. This is followed by a 1 min step at 80% B before reequilibration with the initial conditions. Mass spectra were acquired in centroid mode ranging from 250 – 3000  $m/z$  at a 2 Hz scan rate.

### 1.3.4 LC-MS system 2 – semi-preparative purification

The final purification was performed on a Dionex Ultimate 3000 SDLC low pressure gradient system using a Luna, 5 $\mu$ , C18(2), 100A, 250 x 100 mm column (Phenomenex). Separation of 80  $\mu\text{L}$  sample was achieved by a gradient from (A)  $\text{H}_2\text{O} + 0.1\% \text{FA}$  to (B)  $\text{ACN} + 0.1\% \text{FA}$  at a flow rate of 5  $\text{mL}/\text{min}$  and 45  $^\circ\text{C}$ . The gradient was as follows: A two min isocratic step at 40 %B, followed by a ramp to 80 %B in 15 min, a two min plateau, return to initial conditions in 1 min and re-equilibration for two min. UV spectra were recorded by a DAD in the range from 200 to 600 nm. The LC flow was split to 0.525  $\text{mL}/\text{min}$  before entering the Thermo Fisher Scientific ISQTM EM single quadrupole mass spectrometer. Mass spectra were acquired by selected ion monitoring (SIM) at  $m/z$  479.68  $[\text{M}+2\text{H}]^{2+}$ , 488.68  $[\text{M}+2\text{H}]^{2+}$ , 525.70  $[\text{M}+2\text{H}]^{2+}$  and fraction collection times were set accordingly.

## 1.4 NMR measurements

NMR spectra were recorded on a 500 MHz *Avance III* (UltraShield) spectrometer or on a 700 MHz *Avance III* (Ascend) spectrometer by Bruker BioSpin MRI GmbH, each equipped with a Helium cooled CryoProbe (TCI), at 298 K, if not stated differently. Chemical shift values of  $^1\text{H}$ - and  $^{13}\text{C}$ -NMR spectra are reported in ppm relative to the residual solvent signal (DMSO- $d_6$ ,  $\delta_{\text{H}}$  2.50 ppm and  $\delta_{\text{C}}$  39.5 ppm) given as an internal standard.  $^{13}\text{C}$ -signals were assigned via 2D-CH and CCH or CNH correlations (HSQC and HMBC), using Bruker standard pulse programs. HSQC experiments were optimized for  $^1J_{\text{C-H}} = 145$  Hz and HMBC experiments were optimized for  $^{2,3}J_{\text{C-H}} = 6$  Hz. Multiplicities are described using the following abbreviations: s = singlet, d = doublet, t = triplet, q = quartet, m = multiplet, b = broad; coupling constants are reported in Hz.

## 1.5 Feeding experiments

4 x 50 mL cultures of Mx152 in M8-CyH medium (1.5 g/L casein peptone, 1.5 g/L yeast extract, 1.0 g/L glucose monohydrate, 1.0 g/L soy flour (degreased), 4.0 g/L starch, 1.0 g/L  $\text{CaCl}_2$  dihydrate, 0.5 g/L  $\text{MgSO}_4$  heptahydrate, 0.004 g/L Na-Fe-EDTA, 11.8 g/L HEPES pH 7.2, adjusted with NaOH before autoclaving) were inoculated with 5 mL of preculture. Each culture was supplemented with 50  $\mu\text{L}$  of a 0.1 M stock solution of one of the labeled aminoacids (L-Valine- $d_8$ , L-Serine-2,3,3- $d_3$  and L-Methionine-(methyl- $^{13}\text{C}$ )). One culture was supplemented with sterile  $\text{H}_2\text{O}$  as a control. After 24 h, 48 h and 72 h, an additional 50  $\mu\text{L}$  of the stock solution was added. After incubation for 8 days at 30 °C and 180 rpm the cultures were harvested by centrifugation. The pellets were then extracted with 50 mL of methanol, dried using a rotary evaporator, redissolved in 1 mL of methanol, and analyzed using LC-MS system 1a.

## 1.6 Biological assays

### 1.6.1 Screening with hCoV-229E-luc reporter virus

Firefly luciferase-expressing Huh-7.5/Fluc cells were infected with a *Renilla* luciferase reporter virus of the alphacoronavirus HCoV-229E-luc one day after seeding ( $2 \times 10^4$  cells/well in a 96 well plate) in the presence of indicated thiamyxin concentrations or DMSO.<sup>[1]</sup> After 48h post inoculation and incubation of the cells at 33 °C and 5% CO<sub>2</sub>, the virus inoculum was removed, cells were washed with PBS and lysed in 50 µl PBS/0,5% Triton X-100. Lysis of cells was further enhanced by freezing of the plates at -20 °C. To determine the cell viability, firefly luciferase activity was measured in 20 µl of the lysate, whereas residual virus replication/infection efficiency was measured in 20 µl of lysate via the *Renilla* luciferase activity (Berthold Centro plate luminometer version 2.02). Mean values were normalised to DMSO treated infected samples and standard deviations of technical duplicates of four independent biological experiments are depicted. Non-linear regression curve and confidence interval (confidence level 95%) were both calculated with GraphPad Prism 9 and half-maximal inhibitory (IC<sub>50</sub>) and cytotoxic (CC<sub>50</sub>) concentrations were interpolated from the curves. As previously described, remdesivir served as positive control for the assay giving an IC<sub>50</sub> value of 5.6 nM.<sup>[2]</sup>

### 1.6.2 Screening with dengue and Zika virus

Huh-7 cells were seeded at  $1.5 \times 10^4$  cells per well in 96 well plates. On the next day, cells were treated with 10 different concentrations of 3 fold serial diluted compounds ranging from 2.54 nM to 50 µM. Cells were inoculated with DENV2-R2A or ZIKV-R2A reporter virus using a multiplicity of infection (MOI) of 0.1. At 48 h post infection, cells were lysed and *Renilla* luciferase activity contained in cell lysates was quantified. To determine cytotoxicity of the compounds, cell viability was measured in parallel to antiviral activity test using the CellTiter Glo<sup>®</sup> Luminescent Cell Viability Assay (Promega) according to manufacturer's instruction. Values were normalized using non-treated solvent control (0.5% DMSO) and IC<sub>50</sub> and CC<sub>50</sub> values were calculated using non-linear regression dose response analysis of the Prism 7 software package (GraphPad Software). Ribavirin was used as positive control giving an IC<sub>50</sub> value of 2.3 µM for DNV2-R2A and 2.5 µM for ZIKV-R2A, without showing effects on Huh-7 cells (>90% cell viability) up to 100 µM concentration.

## 2. Supporting Data

### 2.1 Bioactivity data of MCy9487 crude extract

**Table 1** Activity of strain MCy9487 extracted after 10-d cultivation in CYH medium. Activity determined by serial dilution as previously described<sup>31</sup>. 0- No activity, A- 20  $\mu$ l extract (lowest tested dilution) causing activity, H- 0.16  $\mu$ l extract (highest tested dilution) causing activity .

| Test organism                              | Activity score |
|--------------------------------------------|----------------|
| <i>Escherichia coli</i> TolC               | E              |
| <i>Escherichia coli</i> DSM 1116           | 0              |
| <i>Pseudomonas aeruginosa</i> PA14         | 0              |
| <i>Micrococcus luteus</i> DSM 1790         | E              |
| <i>Mycobacterium smegmatis</i> mc2-155     | A              |
| <i>Chromobacterium violaceum</i> DSM 30191 | C              |
| <i>Staphylococcus aureus</i> Newman        | D              |
| <i>Bacillus subtilis</i> DSM 10            | D              |
| <i>Mucor hiemalis</i> DSM 2656             | D              |
| <i>Candida albicans</i> DSM 1665           | C              |
| <i>Wickerhamomyces anomalus</i> DSM 6766   | H              |

### 2.2 NMR-based structure elucidation

Thiamyxin B is assigned a molecular formula of  $C_{43}H_{59}N_9O_8S_4$  on the basis of HR-ESI-MS data ( $[M+H]^+_{meas} = 958.3449$ ,  $[M+H]^+_{calc} = 958.3442$ ,  $\Delta = 0.7$  ppm). Interpretation of the 1D and 2D NMR spectra (Table 5-8, Figure 26-43)—which is described in detail in the following—, alongside with their characteristic  $MS^2$  fragmentation pattern, reveals thiamyxin B to consist of the following peptide sequence: 2-(hydroxymethyl)-4-methylpent-3-enoic acid(HMMP)—alanine(Ala)—isoleucine(Ile)—Methylthiazoline(Me-thiazoline)—Thiazole—Me-Thiazoline—Dehydro-alanine(Dh-Ala)—Methylserine(Me-Ser)—N-Methylvaline(N-Me-Val)—Thiazole. In the  $^1H$  and HSQC spectra of thiamyxin B we detect four  $\alpha$ -protons with characteristic chemical shifts of  $\delta_H$  4.61 (Ala), 4.78 (Ile), 4.89 (Me-Ser) and 5.31 ppm (N-Me-Val). We find two signals corresponding to the terminal protons of an exo double bond at  $\delta_H = 6.37$  and 5.81 ppm (Dh-Ala), as well as three methine groups at  $\delta_H$  8.30, 8.57 and 5.83 ppm, whereof the deshielded shift of the two protons at  $\delta_H$  8.30 and 8.57 indicate their incorporation in the thiazole units and the more shielded shift of the methine group at  $\delta_H$  5.83 ppm indicates it as the HMMP aliphatic double bond proton. There are three additional shielded methine groups detectable at  $\delta_H$  1.91 (Ile), 2.83 (HMMP) and 2.36 ppm (N-Me-Val), which are—based on their characteristic chemical shifts—branching positions in the aliphatic sidechains of the respective amino acids. Furthermore, we find five methylene groups at  $\delta_H$  1.36/1.21 (Ile), 3.74 and 3.38/3.81 (Me-Thiazoline), 3.59 (Me-Ser) and 4.89 ppm (HMMP). The shielded shifts of the carbon atoms corresponding to the two proton signals at  $\delta_H$  3.59 (Me-Ser) and 4.89 ppm (HMMP) in the HSQC spectra at  $\delta_C$  71.0 and 67.0 ppm indicate their allocation next to an oxygen atom, whereas the deshielded shift of the methylene at  $\delta_H$  1.36/1.21 ppm,



besides its characteristic splitting pattern allows its assignment as part of the aliphatic chain in Ile next to a stereo center. We detect eleven methyl groups at  $\delta_{\text{H}}$  0.96 (HMMP), 0.96 (HMMP), 1.36 (Ala), 0.93 (Ile), 0.87 (Ile), 1.59 (Me-Thiazoline), 3.19 (Me-Ser), 0.38 (N-Me-Val), 0.71 (N-Me-Val), 2.90 (N-Me-Val) and 1.65 (Me-Thiazoline), whereof the shielded shift of the carbon at  $\delta_{\text{C}}$  58.4 ppm corresponding to  $\delta_{\text{H}}$  3.19 ppm (Me-Ser) points towards its allocation next to an oxygen atom and the slightly shielded shift of the carbon at  $\delta_{\text{C}}$  30.2 ppm corresponding to  $\delta_{\text{H}}$  2.90 (N-Me-Val) towards its allocation next to an nitrogen atom. Lastly, we find four broad signals in the proton spectrum at 7.51, 8.30, 9.36 and 8.97 ppm without corresponding signals in the HSQC, which we assign as peptide bond forming amino groups belonging to Ala, Ile, Dh-Ala and Me-Ser, respectively. Ala was identified as follows: The  $\alpha$ -proton at  $\delta_{\text{H}}$  4.61 ppm shows COSY correlations to the methyl group at  $\delta_{\text{H}}$  4.61 ppm, as well as to the NH proton at  $\delta_{\text{H}}$  7.51 ppm. Both the  $\alpha$ -proton and the methyl group reveal HMBC correlations to a quaternary carbon at  $\delta_{\text{C}}$  171.6 ppm, which was assigned as the amide function connecting Ala and Ile based on its HMBC correlations to the Ile  $\alpha$ -proton. The Ala  $\alpha$ -proton furthermore shows HMBC correlations to a quaternary carbon at  $\delta_{\text{C}}$  165.8 ppm assigned to HMMP, indicating their peptide bond connection between the respective functions. Ile was identified as follows: The Ile  $\alpha$ -proton at  $\delta_{\text{H}}$  4.78 ppm shows COSY correlations to the methine group at  $\delta_{\text{H}}$  1.91 ppm, as well as to the NH proton at  $\delta_{\text{H}}$  8.30 ppm. The methine group in turn reveals COSY correlations to the methyl group at  $\delta_{\text{H}}$  0.93 and the methylene 1.36/1.21 ppm. The methylene group reveals COSY correlations to another methyl group at  $\delta_{\text{H}}$  0.87 ppm. Both the  $\alpha$ -proton and the methine group reveal HMBC correlations to a quaternary carbon at  $\delta_{\text{C}}$  173.1 ppm, which was assigned as the thioamid function connecting Ile and Me-Thiazoline based on its HMBC correlations with the Me-Thiazoline methylene group. The first Me-Thiazoline was identified as follows: The Me-Thiazoline methylene group at  $\delta_{\text{H}}$  3.74 ppm reveals HMBC correlations to the methyl group at  $\delta_{\text{H}}$  1.65 ppm, as well as two quaternary carbons at  $\delta_{\text{C}}$  176.5 and 83.3 ppm. Based on the characteristic chemical shift of the quaternary carbon at  $\delta_{\text{C}}$  83.3 ppm and its correlations to both the methyl and methylene group, it was assigned as Me-Thiazoline  $\alpha$ -carbon. The quaternary carbon at  $\delta_{\text{C}}$  176.5 ppm shows additional correlations with the Thiazole methine group at 8.30 ppm, indicating it as thiamid function connecting the first Me-Thiazoline with Thiazole. The first Thiazole was identified as follows: The first Thiazole methine group at  $\delta_{\text{H}}$  8.30 ppm shows HMBC correlations to two quaternary carbons at  $\delta_{\text{C}}$  147.5 and 163.8 ppm. Based on its shielded chemical shift and correlations with the second Me-Thiazoline methylene function at  $\delta_{\text{H}}$  3.38/3.81 ppm, the quaternary carbon at  $\delta_{\text{C}}$  163.8 ppm forms the thiamid bond between Thiazole and the second Me-Thiazoline. The second Me-Thiazoline was identified as follows: The second Me-Thiazoline methylene group at  $\delta_{\text{H}}$  3.38/3.81 ppm shows HMBC correlations to the methyl group at  $\delta_{\text{H}}$  1.59 ppm, as well as two quaternary carbons at  $\delta_{\text{C}}$  172.9 and 84.9 ppm. Based on the characteristic chemical shift of the quaternary carbon at  $\delta_{\text{C}}$  84.9 ppm and its correlations to both the methyl and methylene group, it was

assigned as Me-Thiazoline  $\alpha$ -carbon. The quaternary carbon at  $\delta_c$  172.9 ppm shows additional correlations with the Dh-Ala NH proton at  $\delta_H$  9.36 ppm, indicating peptide bond formation here. Dh-Ala was identified as follows: The exo-double bond protons at  $\delta_H$  6.37 and 5.81 ppm show HMBC correlations to two quaternary carbons at  $\delta_c$  132.7 and 163.1 ppm. The characteristic chemical shift of the quaternary carbon at  $\delta_c$  132.7 identifies it as participating in the double bond, whereas the quaternary carbon at  $\delta_c$  163.1 ppm was identified as amid function connecting Dh-Ala with Me-Ser based on its characteristic chemical shift, as well as correlations to the Me-Ser  $\alpha$ -proton. Me-Ser was identified as follows: The Me-Ser  $\alpha$ -proton at  $\delta_H$  4.89 ppm shows COSY correlations to the methylene group at  $\delta_H$  3.59 ppm, as well as to the NH proton at  $\delta_H$  8.97 ppm. The methylene group reveals HMBC correlations to a methyl group at  $\delta_H$  3.19 ppm, which was assigned as methoxy function based on its characteristic chemical shifts and splitting pattern as a singlet. Both the  $\alpha$ -proton and the methylene group reveal HMBC correlations to a quaternary carbon at  $\delta_c$  170.6 ppm, which was assigned as the amide function connecting Me-Ser and N-Me-Val based on its HMBC correlations to the N-Me-Val  $\alpha$ -proton. N-Me-Val was identified as follows: The  $\alpha$ -proton at  $\delta_H$  5.31 ppm shows COSY correlations to the methine group at  $\delta_H$  2.36 ppm. The methine group in turn reveals COSY correlations to two methyl groups at  $\delta_H$  0.38 and 0.71 ppm. For both the  $\alpha$ -proton and the methine group the HMBC correlations to the quaternary carbon at  $\delta_c$  168.3 ppm do not exceed the limit of detection, but its characteristic chemical shift and correlations with the second Thiazole methine at 8.57 ppm allow its assignment as the amide function connecting N-Me-Val and the second Thiazole. Further proof for this assignment was given by the NMR spectra acquired for thiamyxin A (Table 6, Figure 31-34) where the respective correlations are detectable. The NMe group at  $\delta_H$  2.90 ppm, which was assigned based on its characteristic chemical shift, is located at the Val amino function based on its HMBC correlations to both the N-Me-Val  $\alpha$ -proton and the Me-Ser amide function. The second Thiazole was identified as follows: The second Thiazole methine group at  $\delta_H$  8.57 ppm reveals HMBC correlations to two quaternary carbons at  $\delta_c$  145.2 and 160.5 ppm. Based on its shielded chemical shift and correlations with the HMMP methylene function at  $\delta_H$  4.89 ppm, the quaternary carbon at  $\delta_c$  160.5 ppm forms the ester bond between Thiazole and HMMP. HMMP was identified as follows: The HMMP methylene function participating in the ester bond at  $\delta_H$  4.89 ppm shows HMBC correlations to a methine group a  $\delta_H$  5.83 ppm, as well as two quaternary carbons at  $\delta_c$  129.2 and 165.8 ppm. Based on their characteristic chemical shifts, the quaternary carbon at  $\delta_c$  129.2 ppm and the methine group at  $\delta_H$  5.83 ppm participate in a double bond. The methine group reveals COSY correlations to another more deshielded methine group at  $\delta_H$  2.83 ppm, which in turn shows correlations with two methyl groups at  $\delta_H$  0.96 ppm.

Their consistent peptide sequence and exact mass but different retention time on HPLC-MS indicate thiamyxin A ( $[M+H]^+_{meas} = 958.3448$ ,  $[M+H]^+_{calc} = 958.3442$ ,  $\Delta = 0.6$  ppm) and B to be diastereomers.

This finding is in-line with the identical correlations observed in the NMR data acquired for thiamyxin A and B, as well as their very similar chemical shifts, except in the Ala and Ile region (see Table 5 and 6). The detailed analysis of this effect is described in the main manuscript and depicted in Figure 4 in this supporting information. The characteristic chemical shift of the HMMP methylene at  $\delta_H = 4.89$  and  $\delta_C = 67.0$  ppm, alongside with its HMBC correlation to the thiazole carboxy function implies cyclisation between the C-terminal thiazole and HMMP primary alcohol for both thiamyxin A and B. In contrary, thiamyxin C (Table 7, Figure 35-39) shows a shielded chemical shift at this position of  $\delta_H = 4.00$  and  $\delta_C = 63.1$  ppm with no signal split, which—in accordance with its sum formula of  $C_{43}H_{61}N_9O_9S_4([M+H]^+_{meas} = 976.3556, [M+H]^+_{calc} = 976.3548, \Delta = 0.8 \text{ ppm})$ —reveals it to be the hydrolyzed non-cyclized congener (Figure 1). The molecular mass of thiamyxin D is further increased by  $C_3H_6O_2$  ( $[M+H]^+_{meas} = 1050.3928, [M+H]^+_{calc} = 1050.3916, \Delta = 1.1 \text{ ppm})$  when compared to thiamyxin C. Chemical shifts of the HMMP methylene in thiamyxin D only shows a deviation of 0.1 ppm for  $\delta_C$  and 0.0 ppm for  $\delta_H$  when compared to the C derivative, affirming that thiamyxin D also belongs to the open chain derivatives. In comparison to thiamyxin A-C, HSQC spectra of thiamyxin D (Table 8, Figure 40-43) show two additional methylene groups at  $\delta_H$  4.16/4.28 and 3.41 ppm, as well as one additional methine group at  $\delta_H$  3.76 ppm. Their characteristic chemical shifts reveal them all as hydroxylated and COSY correlations the methylene at 4.16/4.28 with the methine function, as well as COSY correlations of the methine group with the second methylene group at 3.41 disseminates the additional part of the molecule to be glycerol. The methylene group at 4.16/4.28 ppm furthermore shows correlations to the N-Me-Val C-terminus, revealing the N-Me-Val quaternary carbon at 172.2 ppm to participate in the ester bond with the respective glycerol methylene.

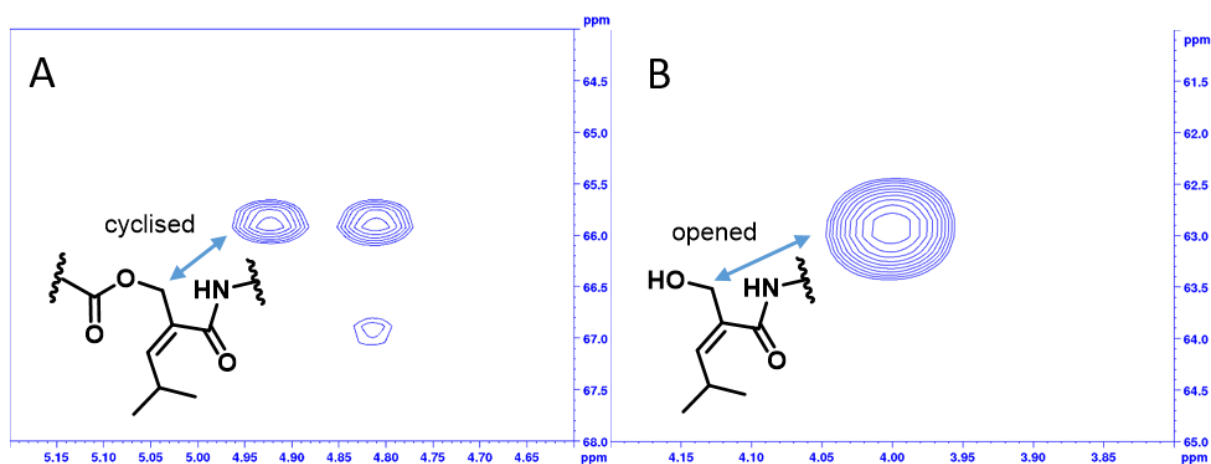

**Figure 1** HSQC NMR signal of HMMP-CH<sub>2</sub> group of cyclized thiamyxin A (A) compared to open chain thiamyxin C (B) derivative.

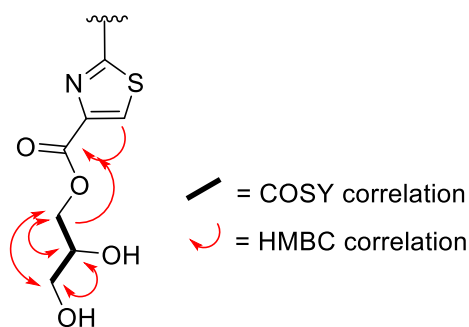

**Figure 2** Glycerol attachment to thiazole unit in thiamyxin D derivative.

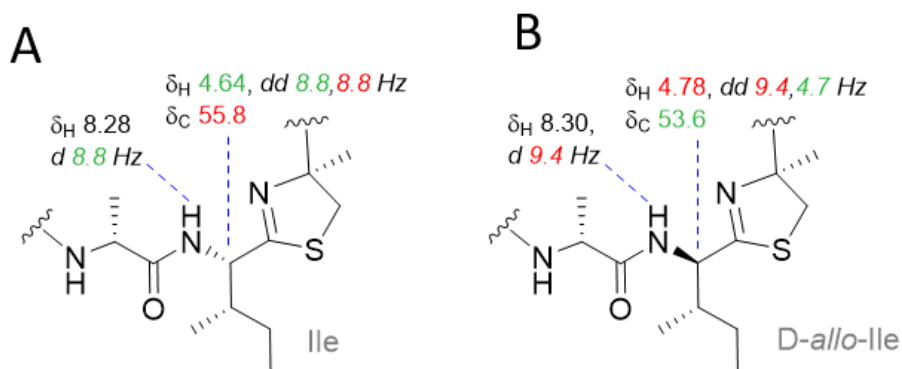

**Figure 3** Analysis of observed shift and coupling constant differences of isoleucine vs. allo-isoleucine in thiamyxin A (A) and B (B). Larger values in red, smaller values in green are exactly matching the pattern shown by Anderson et al., in 2017.<sup>[4]</sup>

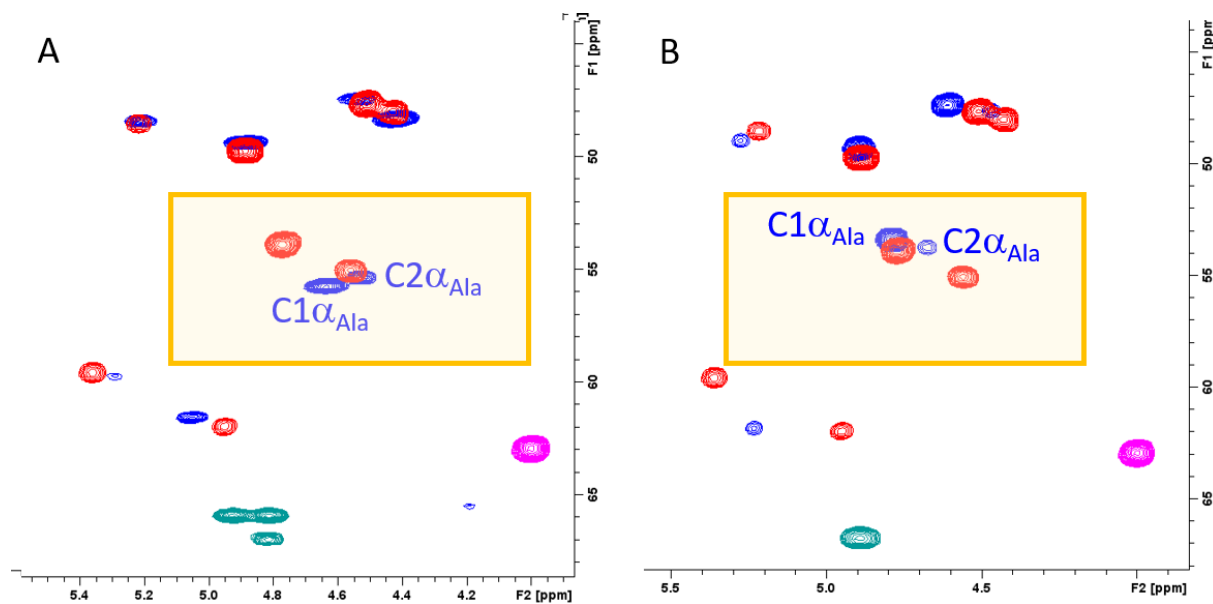

**Figure 4** HSQC NMR section of thiamyxin A (A, blue/green signal set) and thiamyxin B (B, blue/green signal set), each overlapped with open chain derivative thiamyxin C (red/pink signal set). The highlighted signal sets were assigned to alpha-CH of the Alanin residue (Ala). Detailed analysis revealed both diastereomers (Ile and *allo*-Ile carrying derivative) in the open chain derivatives (see also Figure 3). The second signal set in thiamyxin A and B was assigned a second conformer (C1 and C2), as only occurring in the cyclized derivatives. In addition, the same ratio of signal sets in different isolated batches strongly indicates a stable equilibrium of two conformers.

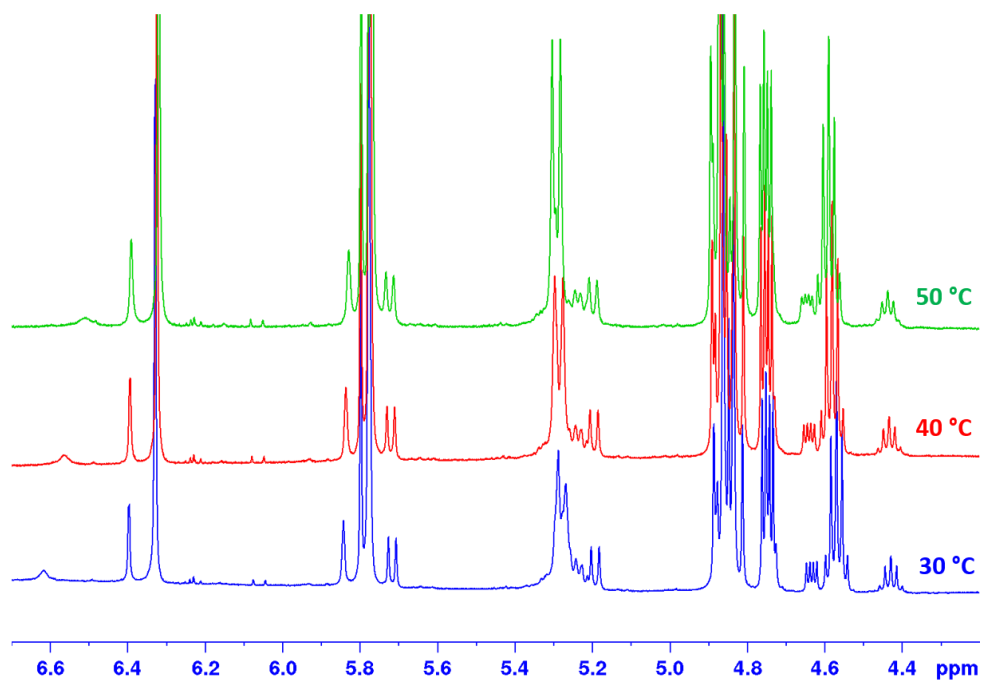

**Figure 5**  $^1\text{H}$  NMR section of thiamyxin B. Increasing measurement temperature does not cause a change in ratio of different conformers.

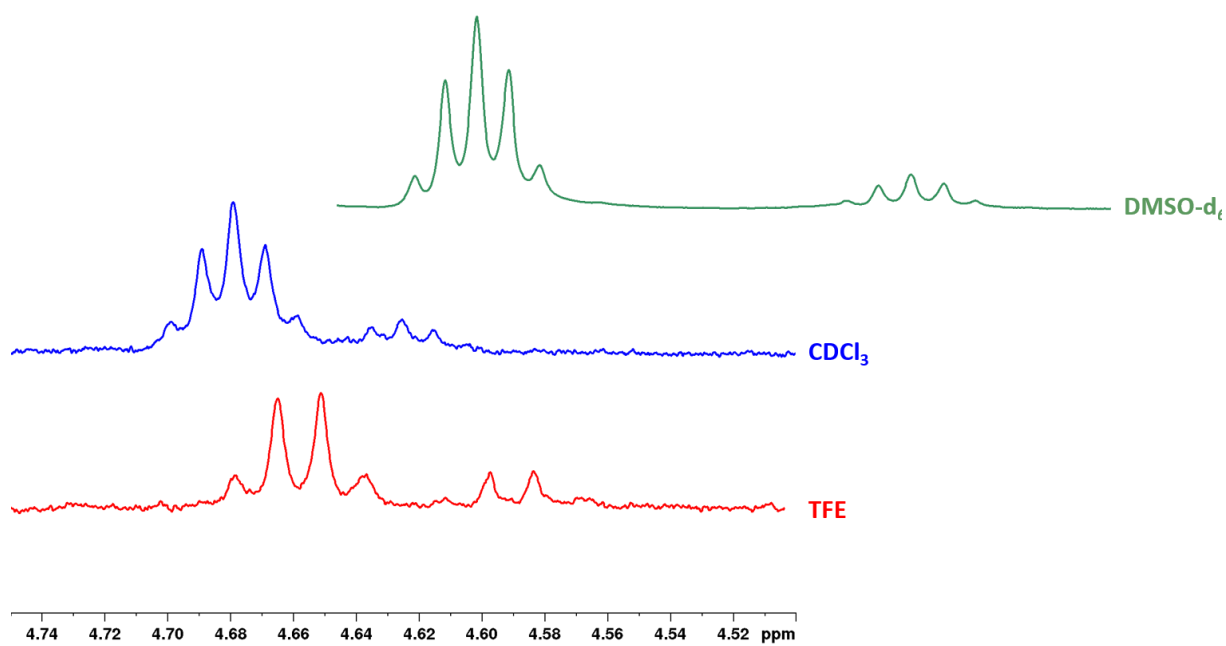

**Figure 6**  $^1\text{H}$  NMR section of thiamyxin B. Comparison of different solvents used for NMR measurements. No significant change in the ratio of conformers was observed.

## 2.3 Stereochemistry assignment

The stereochemistry was assigned based using the Marfey's method.<sup>[5]</sup> Thiamyxin D was used for the stereochemistry assignment of Alanine, 4-methyl-thiazoline, O-methyl-serine and N-Methyl-valine. To attempt assignment of the isoleucine stereochemistry, thiamyxin A and B were hydrolyzed in addition to thiamyxin D and derivatized separately. The samples were analyzed using a longer gradient with improved separation for isoleucine and alloisoleucine. The retention times of references and thiamyxin hydrolysate and stereochemical assignment are summarized in table 1.

**Table 2** Retention times and stereochemical assignment of the thiamyxin amino acids.

| Reference<br>Amino Acid | L-FDLA   |       |       |       | D-FDLA   |       |       |       | configuration |
|-------------------------|----------|-------|-------|-------|----------|-------|-------|-------|---------------|
|                         | Standard | TM D  | TM A  | TM B  | Standard | TM D  | TM A  | TM B  |               |
| L-alanine               | 14.1     | 16.6  | n/a   | n/a   | 16.6     | 14.1  | n/a   | n/a   | D/R           |
| L-isoleucine            | 13.5     | 13.5  | 13.5  | 13.5  | 26.75    | 26.75 | 26.75 | 26.75 | D/R – L/S     |
| D-isoleucine            | 26.75    | 26.75 | 26.75 | 26.75 | 13.3     | 13.3  | 13.3  | 13.3  | D/R – L/S     |
| 2-Me-<br>Cysteine 1&2   | 10.4     | 10.4  | n/a   | n/a   | 9.6      | 9.6   | n/a   | n/a   | L/R           |
| O-Me-L-<br>Serine       | 13.7     | 13.7  | n/a   | n/a   | 16.6     | 16.6  | n/a   | n/a   | L/S           |
| L-Valine                | 16.1     | 16.1  | n/a   | n/a   | 19.6     | 19.6  | n/a   | n/a   | L/S           |

### 2.3.1 N-methyl-valine assignment

We were not able to detect N-methyl-valine after hydrolysis of the intact compounds, but instead observed a peak for L-valine. When subjecting the N-methyl-valine reference to the same conditions we were also able to detect Valine although in lower amounts (Figure 7). We assume that under acidic conditions the N-Methyl-Valine is demethylated and assigned the stereocenter as S-configured, in accordance with the detected L-Valine.

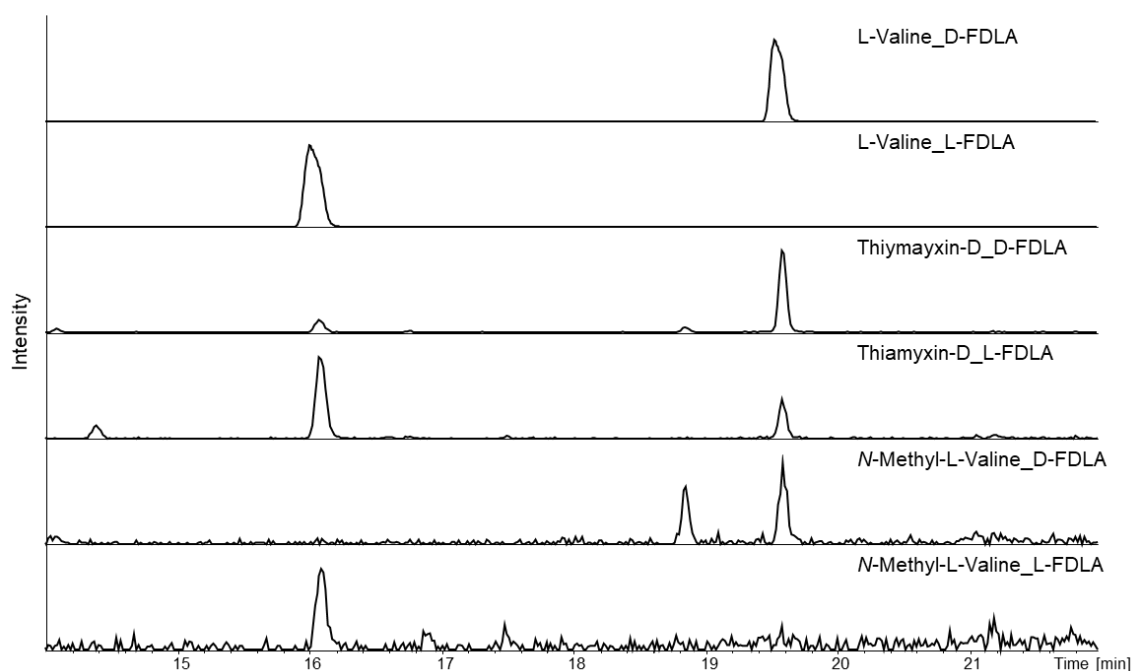

**Figure 7** Extracted ion chromatograms for 412.183  $m/z$  for derivatized L-Valine, thiamyxin D and N-methyl-L-valine.

### 2.3.2 Isoleucine assignment

To assign the stereochemistry of the isoleucine moiety, D- and L- isoleucine (I) as well as D- and L- alloisoleucine (AI) references were derivatized with D- and L- 1-flouro-2,4-dinitrophenyl-5-leucine-amide (FDLA). D-AI-D-FDLA, D-I-D-FDLA, L-AI-L-FDLA and L-I-L-FDLA have identical retention times,, as do D-AI-L-FDLA, D-I-L-FDLA, L-AI-D-FDLA and L-I-D-FDLA. When derivatized with D-FDLA, the thiamyxin A and B samples show peaks for D-AI-D-FDLA / D-I-D-FDLA and L-AI-D-FDLA / L-I-D-FDLA, however the peaks corresponding to D-AI-D-FDLA / D-I-D-FDLA are slightly larger. When derivatized with L-FDLA the thiamyxin A and B samples show peaks for L-I-L-FDLA / L-AI-L-FDLA and D-AI-L-FDLA / D-I-L-FDLA and again the peaks corresponding to D-AI-L-FDLA / D-I-L-FDLA are slightly larger. (Figure 8) We observe the corresponding peaks for D- and L- isoleucine for thiamyxin A as well as B due to a racemization reaction commonly occurring during acid hydrolysis for stereocenters adjacent to thiazoline moieties.<sup>[6]</sup> Even when extensively optimizing the reaction conditions, we were unable to fully retain Ile in its original configuration. As the differences in peak heights are not significant, we therefore were unable to assign D- or L-configuration of the thiamyxins based on this Marfeys analysis. Our NMR results however, clearly indicate thiamyxin B to incorporate Ile in *allo*-configuration (see Figure 3). We find an epimerization domain located in the isoleucine incorporating module so we assume the main product of the assembly line and all deriving shunt or degradation products (thiamyxin B, C and D) to incorporate D-*allo*-isoleucine. The high prevalence of L-Ile in natural products points towards its incorporation in thiamyxin A, but we cannot exclude a rather rare incorporation of D-Ile here. The resembling biological activities of thiamyxin A and B would reason them both to be D-configured, as this would result in a more similar conformation of the macrocycle. As the target of the

thiAMYXINS has not been identified yet, correlating their three dimensional structure with activity is highly speculative and only developing a total synthesis route for the thiAMYXINS will finally confirm the configuration of the Ile stereocenters.



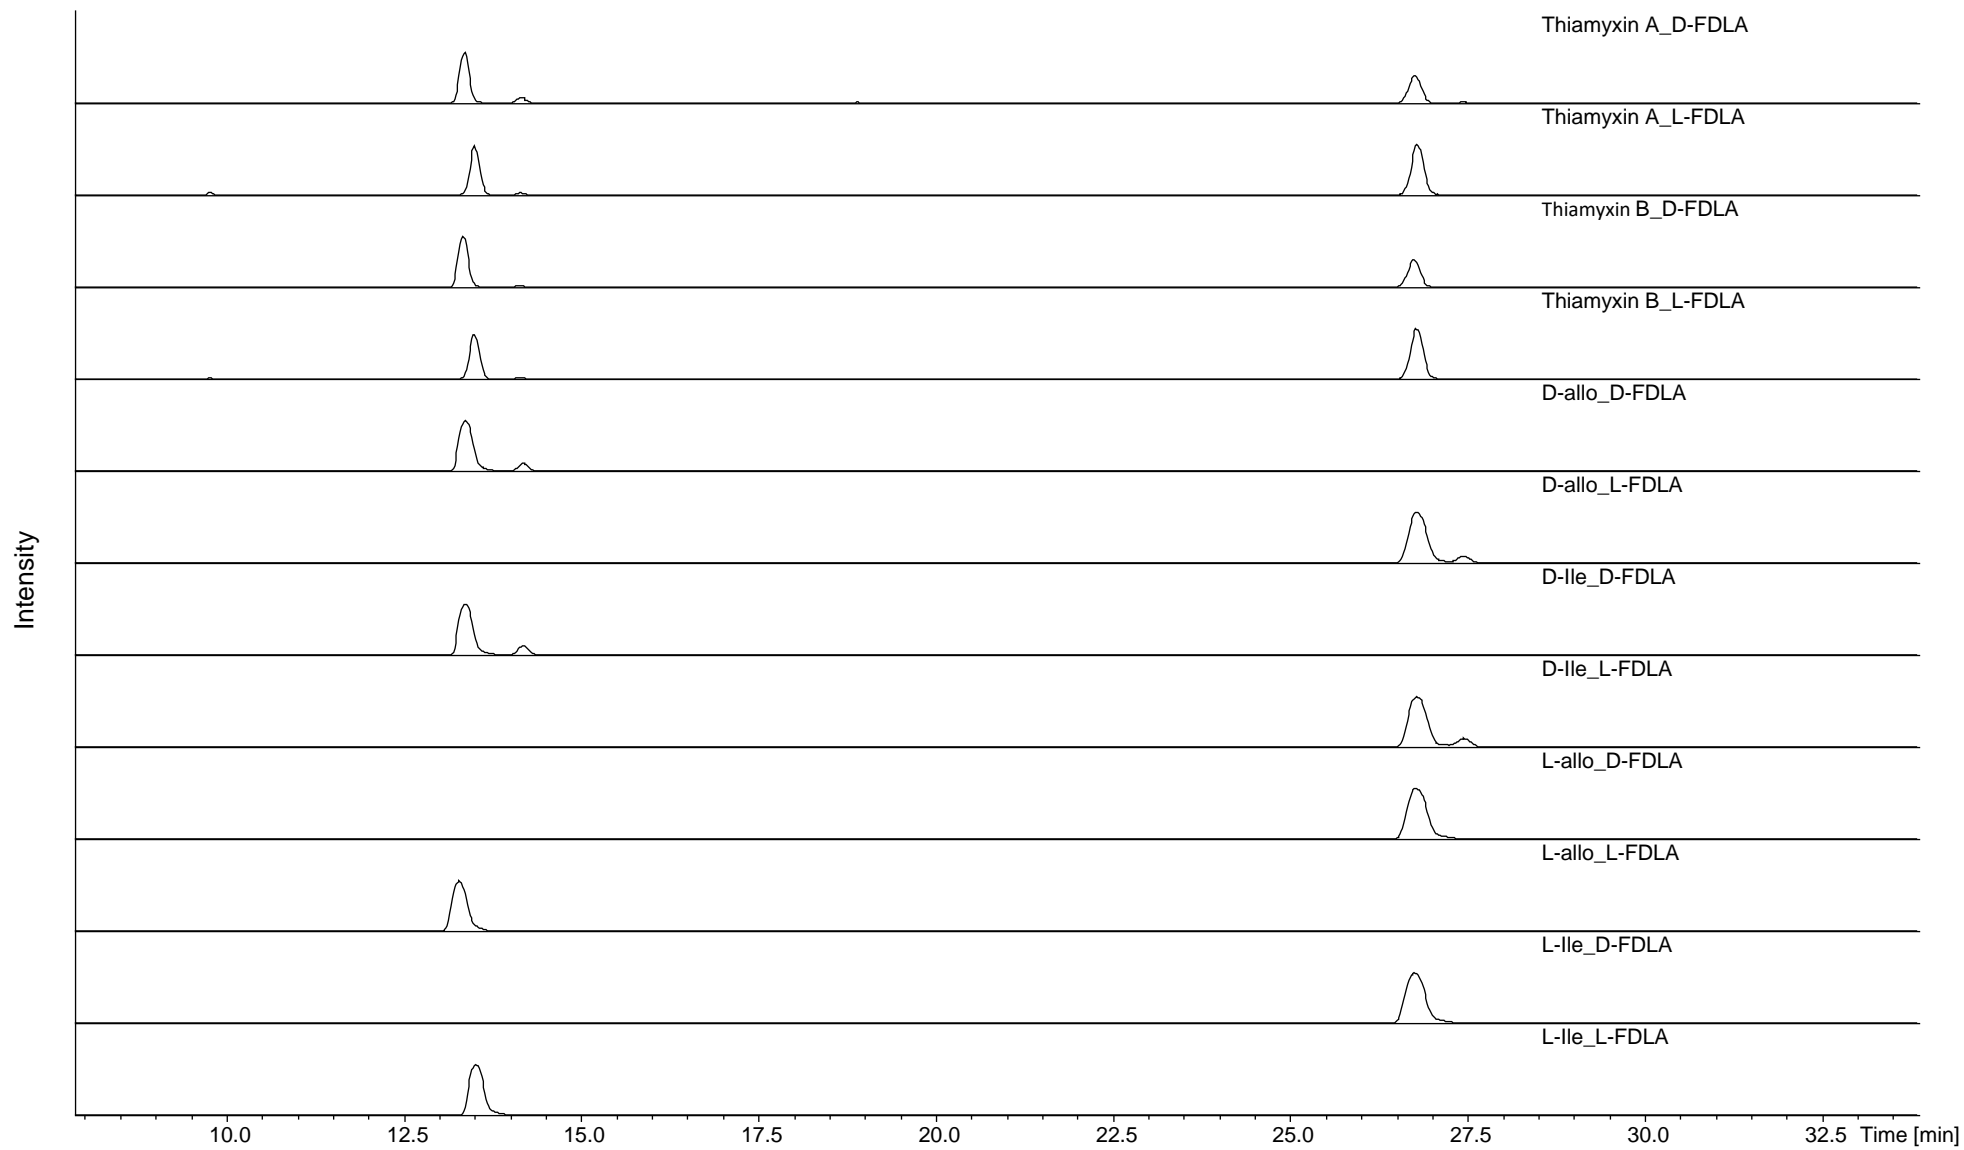

Figure 8 Extracted ion chromatograms for 426.198  $m/z$  for derivatized D-alloisoleucine, D-Isoleucine, L-alloisoleucine, L-isoleucine and thiamyxins A and B.

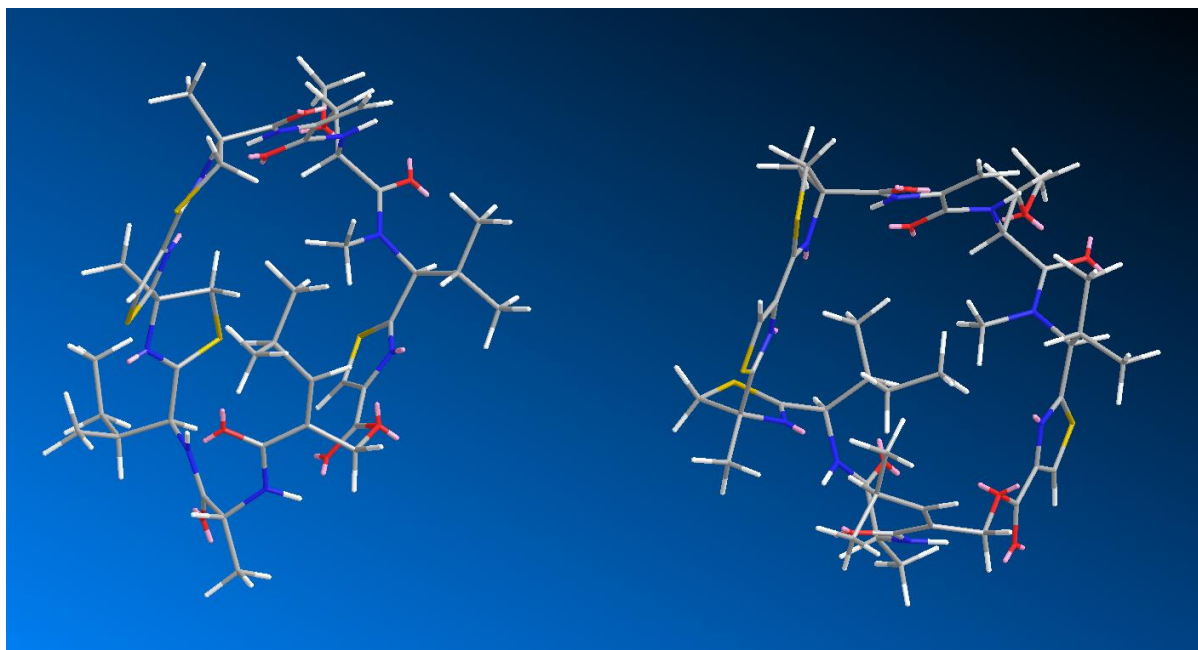

**Figure 9** Lowest energy conformation of thiamyxin A (left) and thiamyxin B (right) as simulated using Chem3D (20.1.1).

### 2.3.3 Thiazoline assignment

To assign the stereochemistry of the 4-methyl-thiazoline stereocenters, we decided to use hydrolyzed thiangazole A as a reference due to inaccessibility issues of 2-methyl-cysteine. The peaks for 430.139  $m/z$  of the hydrolyzed and derivatized samples of thiangazole A and thiamyxin D show identical retention times. As the stereocenters of the 4-methyl-thiazoline moieties in thiangazole A are all derived from *R*-configured 2-methylcysteine and there are no additional peaks with the relevant  $m/z$  in either sample we assign both 4-methyl-thiazoline stereocenters in the thiamyxins to be *R*-configured as well.

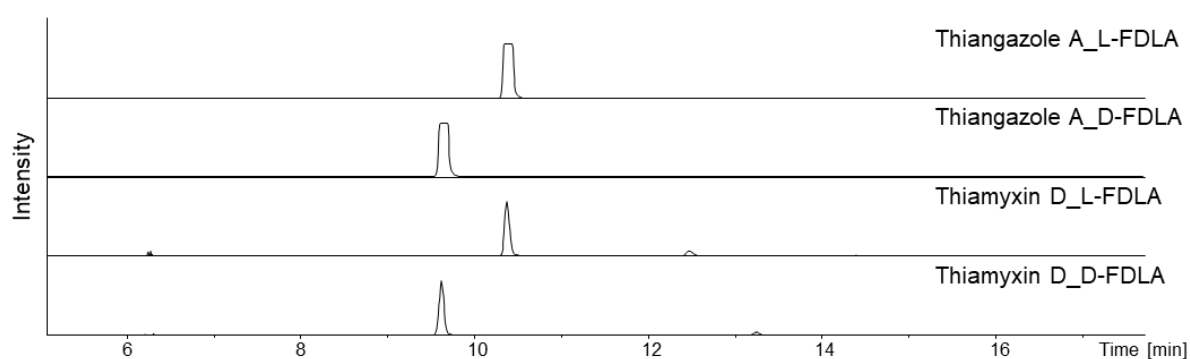

**Figure 10** Extracted ion chromatograms for 430.139  $m/z$  for derivatized thiangazole A and thiamyxin D.

### 2.3.4 Stability of thiamyxin A

To investigate if thiamyxin A can be converted to thiamyxin B, we treated thiamyxin A with pyridine, but could not detect any conversion. This finding supports our hypothesis that thiamyxin A indeed seems to be a side product of the assembly line rather than an artefact from the purification process.

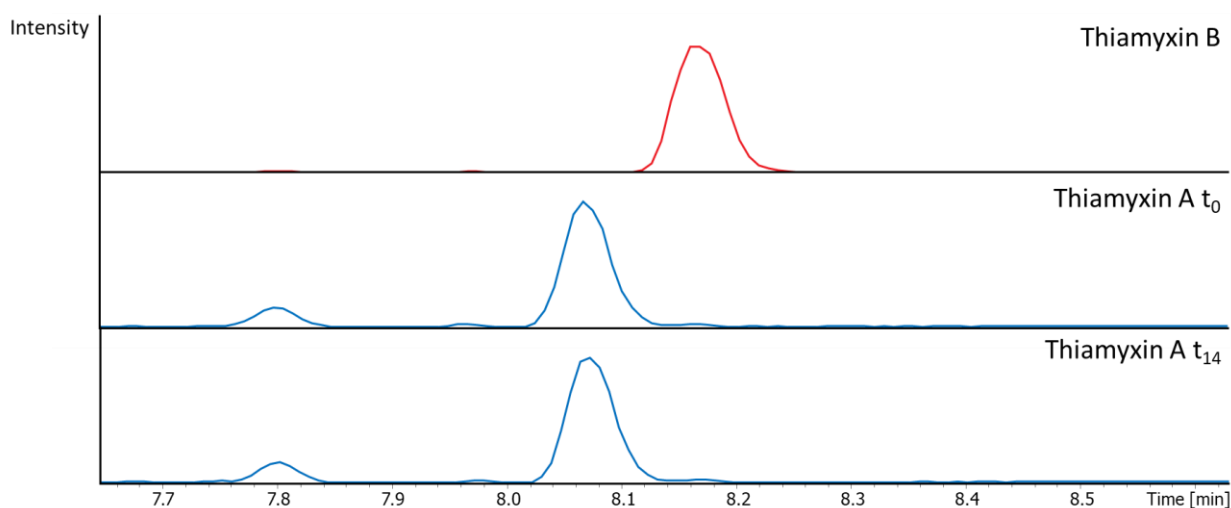

**Figure 11** BPC of thiamyxin A (blue) in aqueous solution before base treatment ( $t_0$ ) and after 14 h incubation at rt upon treatment with 5% pyridine. Thiamyxin B shown in red as a reference.

## 2.4 Gene cluster organization and proposed biosynthesis

Sequencing of the MCy9487 genome was performed as previously described for other myxobacteria.<sup>[2]</sup> The thiamyxin biosynthetic gene cluster was identified by submitting the MCy9487 genome to antiSMASH<sup>[7]</sup>, analyzing the biosynthetic logic of the clusters and matching them to the elucidated structure. The pinpointed genes and closest orthologues can be found in Table 3. The orthologues were identified by BLAST<sup>[8]</sup> search based on the amino acid sequence of the query and the results table sorted by E-value. The top hit was chosen as representative orthologue. Most domains required for the biosynthesis hypothesis were identified by antiSMASH, however the oxidation domains in modules M7 and M12 as well as the O-methyltransferase domain in module M10 and the dimerization domain in module M1 were identified by submitting the corresponding sequences to CDD/SPARCLE<sup>[9]</sup>. The biosynthetic gene cluster with the corresponding annotations can be found under GenBank tag Thiamyxin\_BGC\_MCy9487 under GenBank accession number OP494098.

**Table 3: Open reading frames in the thiamyxin biosynthetic gene cluster with proposed function and closest homologue.**

| Name         | Size [AA] | Proposed function / homologue                             | organism                         | Accession number of closest protein homologue | Sequence Identity [%] |
|--------------|-----------|-----------------------------------------------------------|----------------------------------|-----------------------------------------------|-----------------------|
| <b>Orf 1</b> | 117       | calmodulin                                                | <i>Myxococcus fulvus</i>         | WP_074958239.1                                | 89.66                 |
| <b>Orf 2</b> | 104       | hypothetical protein                                      | <i>Coralloccoccus terminator</i> | WP_147449015.1                                | 62.14                 |
| <b>ThiA</b>  | 3022      | polyketide synthase domain-containing protein dehydratase | <i>Coralloccoccus terminator</i> | WP_120539938.1                                | 82.22                 |

|              |      |                                                    |                                       |                |       |
|--------------|------|----------------------------------------------------|---------------------------------------|----------------|-------|
| <b>ThiB</b>  | 3114 | amino acid adenylation domain-containing protein   | <i>Corallocooccus terminator</i>      | WP_120539939.1 | 84.04 |
| <b>ThiC</b>  | 2025 | AMP-binding protein                                | <i>Corallocooccus terminator</i>      | WP_147448653.1 | 84.85 |
| <b>ThiD</b>  | 1393 | amino acid adenylation domain-containing protein   | <i>Hapalosiphon sp. MRB220</i>        | WP_053457693.1 | 51.31 |
| <b>Orf 3</b> | 107  | hypothetical protein                               | <i>Corallocooccus terminator</i>      | WP_120544219.1 | 61.95 |
| <b>Orf 4</b> | 396  | TRC40/GET3/ArsA family transport-energizing ATPase | <i>Corallocooccus terminator</i>      | WP_120544218.1 | 96.97 |
| <b>ThiI</b>  | 413  | cytochrome P450                                    | <i>Corallocooccus terminator</i>      | RKG77511.1     | 87.89 |
| <b>ThiJ</b>  | 319  | alpha/beta fold hydrolase                          | <i>Corallocooccus terminator</i>      | WP_158625188.1 | 84.64 |
| <b>ThiE</b>  | 1555 | amino acid adenylation domain-containing protein   | <i>Corallocooccus terminator</i>      | WP_120544215.1 | 88.24 |
| <b>ThiF</b>  | 2499 | amino acid adenylation domain-containing protein   | <i>Archangium primigenium</i>         | WP_204490555.1 | 49.15 |
| <b>ThiG</b>  | 2055 | amino acid adenylation domain-containing protein   | <i>Corallocooccus terminator</i>      | WP_120544021.1 | 85.29 |
| <b>ThiH</b>  | 742  | amino acid adenylation domain-containing protein   | <i>Corallocooccus terminator</i>      | WP_120544021.1 | 83.11 |
| <b>Orf 5</b> | 940  | type I polyketide synthase                         | <i>Corallocooccus terminator</i>      | WP_120544022.1 | 81.06 |
| <b>Orf 6</b> | 336  | patatin-like phospholipase family protein          | <i>Corallocooccus terminator</i>      | WP_120544023.1 | 87.99 |
| <b>Orf 7</b> | 333  | radical SAM protein                                | <i>Corallocooccus terminator</i>      | WP_120543822.1 | 94.89 |
| <b>Orf 8</b> | 182  | NUDIX domain-containing protein                    | <i>Corallocooccus sp. ZKHcc1 1396</i> | WP_193348944.1 | 87.43 |
| <b>Orf 9</b> | 296  | hypothetical protein                               | <i>Corallocooccus terminator</i>      | WP_120543827.1 | 87.50 |

### 2.4.1 Active site residues of module 5 (*thiC*)

Module 5 consists of a condensation and peptidyl carrier protein (PCP) domain. As there is no biosynthetic step assigned to this module, yet it the C domain contains an intact active site, we propose that its function is assisting the loading the nascent molecule onto the PCP-domain of the next module.

Feature 1

|              |      |                    |     |              |     |          |     |                |     |          |     |       |      |
|--------------|------|--------------------|-----|--------------|-----|----------|-----|----------------|-----|----------|-----|-------|------|
| query        | 9    | IYPLSPSQGMLYESLA.  | [5] | .IHVEQLVWRM. | [1] | .GPLDEA. | [1] | .LERAWQQVDRH.  | [1] | .VLRTCF. | [4] | .QSEP | 75   |
| NP_624809    | 1194 | ILPLTPLQEGLYFHSVY. | [6] | .SYVEQQLTL.  | [1] | .GEVDPG. | [1] | .LAAAATRLLTLH. | [1] | .NLAARF. | [4] | .DGRV | 1261 |
| NP_251114    | 3250 | VYPLTPMQEGLLHTLL.  | [5] | .IYYMQDRYRI. | [1] | .SPLDPE. | [1] | .FAAAWQAVVARH. | [1] | .ALRAS.  | [4] | .GETM | 3316 |
| Q939Z0       | 3022 | IWPLSPLQEGLLFHAAD. | [5] | .VYASMRTLAI. | [1] | .GPLDVA. | [1] | .FRASWTVLLDRH. | [1] | .ALRAS.  | [4] | .SGEA | 3088 |
| WP_012266627 | 15   | IYPLSPMQEGMLFHSLY. | [5] | .IYCSQTLITL. | [1] | .GEINLA. | [1] | .FRQAWKVVVERH. | [1] | .VLRTLF. | [4] | .REKP | 81   |
| WP_012267918 | 17   | IYPLSPMQGMLFHSLY.  | [5] | .TYLSQIQITL. | [1] | .GNLDIN. | [1] | .FQQAWKVVDRH.  | [1] | .ILRTCF. | [4] | .TKQP | 83   |
| O68008       | 5091 | IYPLANMQGMLFHALE.  | [5] | .AYFEQMAINM. | [1] | .GLIDER. | [1] | .FAETFNDIMERH. | [1] | .ILRASI. | [4] | .TDEP | 5157 |
| Q70LM6       | 2584 | VYTLTPLQEGMLFHSLY. | [5] | .DYVVQLALKL. | [1] | .HVNVEA  |     | .FSAAWKVVVERH. | [1] | .ILRTSF. | [4] | .LEKP | 2649 |
| Q04747       | 9    | VYALTPMQEGMLYHAML. | [5] | .SYFTQLELGI. | [1] | .GAFDLE. | [1] | .FEKSVNELIRSY. | [1] | .ILRTVF. | [4] | .LQKP | 75   |

  

Feature 1

|              |      |        |     |              |      |          |     |            |     |              |     |                  |      |
|--------------|------|--------|-----|--------------|------|----------|-----|------------|-----|--------------|-----|------------------|------|
| query        | 76   | VQVVL. | [2] | .VSVTLRSHDL. | [11] | .LEAELE. | [1] | .DRLRGFKP. | [2] | .APLMKLSLFR. | [4] | .EARLVWTFHLLLDG  | 149  |
| NP_624809    | 1262 | VSVLE. | [2] | .REAPFTVLDL. | [7]  | .IRAHAE. | [1] | .DRRAGFDL. | [2] | .GPPMRYTLIR. | [4] | .RHVLVQTVHHIVADG | 1331 |
| NP_251114    | 3317 | LQVIH. | [2] | .GRTRIEFLDW. | [11] | .LQALHK. | [1] | .EREAGFDL. | [2] | .QPPFHLRLIR. | [4] | .RYWFMMSNHHILIDA | 3390 |
| Q939Z0       | 3089 | VQVIA. | [2] | .VPPDWRETDL. | [11] | .FDRLAA. | [1] | .MHAERFDL. | [2] | .APQLRLHLVR. | [4] | .RYRLIFTSHHIVADG | 3162 |
| WP_012266627 | 82   | LQIVR. | [2] | .VDLPWDYQDW. | [11] | .LDLLE.  | [1] | .ERQQGFEL. | [2] | .APLMRCLMIQ. | [4] | .TYKFLCNHHIILDG  | 155  |
| WP_012267918 | 84   | LQVVR. | [2] | .VTLPWFNQDW. | [11] | .FQELLT. | [1] | .DKEQYFEL. | [2] | .VPLIRCHLIR. | [4] | .KYEFIHTGHHIILDG | 157  |
| O68008       | 5158 | RNVII. | [2] | .RKINLDYHDL. | [11] | .IQAYRK. | [1] | .DREKGFRL. | [2] | .EPLIRAALMR. | [4] | .SYTFIWTNHHIILDG | 5231 |
| Q70LM6       | 2650 | HQVVH. | [2] | .VKTFVERLDW. | [11] | .LQTYLE. | [1] | .DRKRGFDL. | [2] | .PPLMRWTLIR. | [4] | .TFQFVWSFHHMLLDG | 2723 |
| Q04747       | 76   | RQVVL. | [2] | .RKTKVHYEDI. | [11] | .IERYKQ. | [1] | .VQRQGFNL. | [2] | .DILFKVAVFR. | [4] | .QLYLWVSNHHIMDG  | 149  |

  

Feature 1

|              |      |                  |      |                  |     |                  |     |         |     |         |      |         |      |    |      |
|--------------|------|------------------|------|------------------|-----|------------------|-----|---------|-----|---------|------|---------|------|----|------|
| query        | 150  | WCLPLLLQEVLSY.   | [13] | .SRPFRDYVWLKR.   | [2] | .PEAARTFWAERLRA. | [3] | .PTPLG. | [4] | .QGEPG. | [1]  | .G      | 224  |    |      |
| NP_624809    | 1332 | WSVPPMLRLLAEY.   | [8]  | .LGGFPEHVRRLLAA. | [2] | .GAASDRVWDEQLAD  |     | .LPGPS  |     | .LIAEG  |      | .H      | 1393 |    |      |
| NP_251114    | 3391 | WCRGLLMNDFFFEIY. | [13] | .PPRYRDYIAWLQR.  | [2] | .LEQSRRWSES      |     | .LRG    |     | .RPTLV. | [10] | .AGESG. | [1]  | .M | 3470 |
| Q939Z0       | 3163 | WSLPLILVDVLTAY.  | [11] | .ATSYRDFLAWDR.   | [2] | .KGAAGQAWRTEL    |     | .LAG    |     | .EATHV. | [3]  | .GSIIT. | [1]  | .L | 3233 |
| WP_012266627 | 156  | WSMPIIYQEVLFY.   | [13] | .PRPYQDYIVWLQQ.  | [2] | .PSIAESFWQRTLEG. | [3] | .PTPLR. | [6] | .MKSEG. | [1]  | .P      | 232  |    |      |
| WP_012267918 | 158  | WATAILLKEVDFY.   | [13] | .PRPYQDYINWLQQ.  | [2] | .QTEAERFWRKNLQ.  | [3] | .PTPLV. | [6] | .PLVTQ. | [1]  | .K      | 234  |    |      |
| O68008       | 5232 | WSRGIIIMGELFHY.  | [13] | .ARPYSDYIGWLQQ.  | [2] | .KEAAKAYWRNYLSG. | [3] | .KSPIS. | [4] | .SSGHA. | [1]  | .Y      | 5306 |    |      |
| Q70LM6       | 2724 | WSTPIVFDWQAFY.   | [13] | .IPPFSAYIAWLKR.  | [2] | .LEEAQQYWRDYLQ.  | [3] | .PTPLG. | [5] | .GSAGQ. | [1]  | .K      | 2799 |    |      |
| Q04747       | 150  | WSMGVLMKSLFQNY.  | [13] | .GKPYSDYIKWLGK.  | [2] | .NEEAESYWSERLAG. | [3] | .PSVLP. | [3] | .PVKKD. | [1]  | .Y      | 223  |    |      |

**Figure 12** Alignment of the C domain of module 5 (*thiC*) amino acid sequence (query) with reference sequences from CDD/SPARCLE database. The active site histidines and aspartic acid of the characteristic HHxxxD motif are highlighted in yellow.

### 2.4.2 Active site residues of orf 5

Orf 5 is located downstream of *thiH* of the thiamyxin gene cluster. It contains a ketosynthase (KS) and PCP domain. The KS domain is missing the first active site histidine (Figure 13). We were not able to assign a biosynthetic function to these domains and therefore presume them to be inactive.

```

Feature 1
query      158 GPSLGVQTA#STSLVAVHLACQSLLSG. [2].DMALAGAVSM. [5].RGLHEEGSSLS. [4].CRAFDDARANGTFFGSG 233
AAC38075   174 GPAMTVTTACSSSLVAMHLACRALQAG. [2].DMALAGGVNL. [5].LTIYMSQIRAIRS. [4].CRVFDAAADGIVRGE 249
AAB08104   177 GPSVLVDTACSGGLTALHLACQSLLVG. [2].RQALAAGSSL. [5].MMVTMSMMKFLS. [4].CYAFDERANGYAR 252
AAB53258   174 GPSYTVDSACSSSLYALEHAFRAIRDG. [2].DAAVVGGSNL. [5].VSLQFSRLGVLS. [4].CKSFNDSANGYAR 249
CAB06094   175 GPSIAVQTACSSSLVAVHLACLSSLG. [2].DMALAGGSSL. [5].VGYFTSPGSMVS. [4].CRPFVVRADGTV 250
AAP42872   206 GPTATLDTACSGSLVALHLACQSLRGG. [2].SMALAGGVTV. [5].TFIGTGRGIGLP. [4].CRSFADGAE 281
CAD19086   194 GPSIVVDTACSSSLVAVHLACQSLRSK. [2].DLAIAGGANL. [5].WSVAISKLQALA. [4].CKTFDARAD 269
CAE14178   201 GPSLQIDTACSSGLTALTQAVNSLRSG. [2].QQAIVGVSNL. [5].NMAAYYRAGMLS. [4].CRVFDADANG 276
AAF00958   197 GPCLSIDTACASSLVAVHQGIRSLRNR. [2].ELALVGGVNL. [5].ITISLSQSGMMS. [4].CKTFDASANG 272
BAB12210  2281 GPSMTIDTACSSSLVAIHLYNALNNG. [2].DLALAGGVNI. [5].ISLIESRAHMLA. [4].CKTFDESANG 2356

Feature 1
query      234 LGVVILKRLSEA. [6].IHAIKGSALNNDGALKVGY. [4].GDSQARVIREALA. [7].SISYVEAN#GTGTPLGDTIEL 315
AAC38075   250 CGVTVLKRLADA. [6].IQAVIRGSAINQDGASAGQT. [3].ANAQAAVISQALK. [7].DIDYVEAN#GTGTPLGDPIEL 330
AAB08104   253 VAVLLKLEDA. [6].IRAVIRGTGCNQDGTPTGIT. [3].SVSQEALIRSVYK. [7].DTTYVECH#GTGTQAGDTTEA 333
AAB53258   250 IVVCFLOKAKDS. [2].VYAQLLHAKTNCDCYKEQGI. [4].GHIQKLLREFYE. [7].ELEFVEAN#GTGTRVGDPEEL 327
CAB06094   251 VGLVVLKPLAAA. [6].IHAVIRGSAINNDGSAKMGY. [4].PAAQADVIAEAHA. [7].TVSYVECH#GTGTPLGDPIEI 332
AAP42872   282 AGVVLLERLSTA. [6].VLAVVRGSAIGQEGTNNQVS. [3].GPAQQRRLIRQALA. [7].EIDAVEGQ#GTGGLLSDAVEA 362
CAD19086   270 CGTIVLKRLSDA. [6].IRALIRGSATNQDGHSSQGLT. [3].GLTQALLRQALQ. [7].QVSYIET#GTGTILGDPIEV 350
CAE14178   277 AICLFLKTQKQA. [6].IYGYVRASAVNHGGRANSLT. [3].PEQQIALVKDCLL. [7].QISYLEAN#GTGSLGDPIEF 357
AAF00958   273 CGVLILKTLSEA. [6].ILALLRGSAVNHGAAAGLT. [3].GPAQQLLRQALA. [7].DVSYIEAN#GTGSLGDPIEL 353
BAB12210  2357 CGIVLKRLSQA. [6].ILAKIYGTAVNHDPSSGLT. [3].GQAQEKLLHQALK. [7].QIDYIEAN#GTGTALGDPIEL 2437

Feature 1
query      316 SALNRAF. [10].ALGSVKTNVG#LSVASGMAGLIKTVLAL. [1].QQLPASLNF. [17].TGLKGWP. [5].RRAGVS 406
AAC38075   331 SLDLDAF. [ 7].WVGSVKANMGHLDAAAGMASVIKTMVVK. [1].AEVPAQLHL. [17].TAIESLP. [3].RLAGIS 416
AAB08104   334 SALSKEV. [ 8].LIGSVKTNIG#LEGASGLAGVKSILMLE. [1].GVLPNRNF. [16].PTTLECW. [5].RRVSVIN 421
AAB53258   328 LAIDEIF. [ 8].LLGSIKSNLGHSEPASGLCSIAKMCIAYT. [1].GYIPPNLNY. [14].MNVITDK. [5].GMSGIN 413
CAB06094   333 QGLRAAF. [11].VLGSVKSNI#GLEVAAGIAGLIKTILCLK. [1].KALPATLHY. [17].SKYGPWE. [4].RRAGVS 423
AAP42872   363 QALASVY. [10].LLGAVKSNLGH#TQASGVAGVIKTVQAMR. [1].GVLPRTLHT. [17].TAATPWP. [5].LRSGVS 453
CAD19086   351 SALSEVY. [10].ILGSVKTNVG#LEAAAGIAGLLKVVLALE. [1].GAVPKQLHF. [17].TEMSWP. [5].RMGAVS 441
CAE14178   358 NALNEVF. [12].YIGSVKANIG#LEGAAGLAGIVKVLMLQ. [1].KSIVPAAAF. [17].TEENSWR. [6].RFAGLS 451
AAF00958   354 NAIASVY. [ 7].YVASVKTNI#GLEAAAGMAGIIKTILILQ. [1].GEIPLPHLF. [17].TQNIWP. [5].PIAGVS 441
BAB12210  2438 ESMSAVF. [ 9].IIGSVKTNL#GLEGAAGIAGLIKTVLALQ. [1].HKIPPHLHF. [17].VQKPWD. [5].RIAGVS 2527

```

**Figure 13** Alignment of the orf 5 KS Domain amino acid sequence (query) with reference sequences from CDD/SPARCLE database. The active site cysteine and histidines are highlighted in yellow.

### 2.4.3 Dimerization domain in thiA

A dimerization domain (red) commonly found within methyltransferase domains was identified upstream of the GNAT domain in module M1 of the thiamyxin gene cluster by submitting the amino acid sequence of thiA to CD-search (Figure 14).

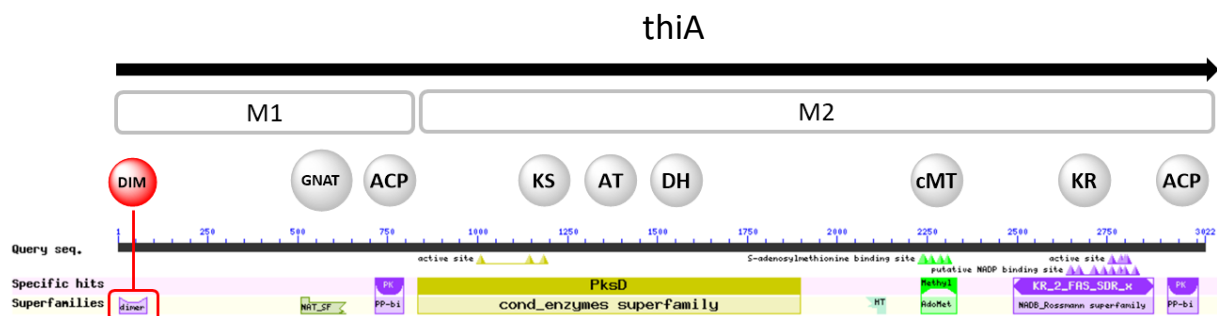

**Figure 14** Output of the CDD/SPARCLE conserved domain search of *thiA*. The dimerization domain is marked in red, other domains in grey.

## 2.4.4 Alignment of GNAT Domains

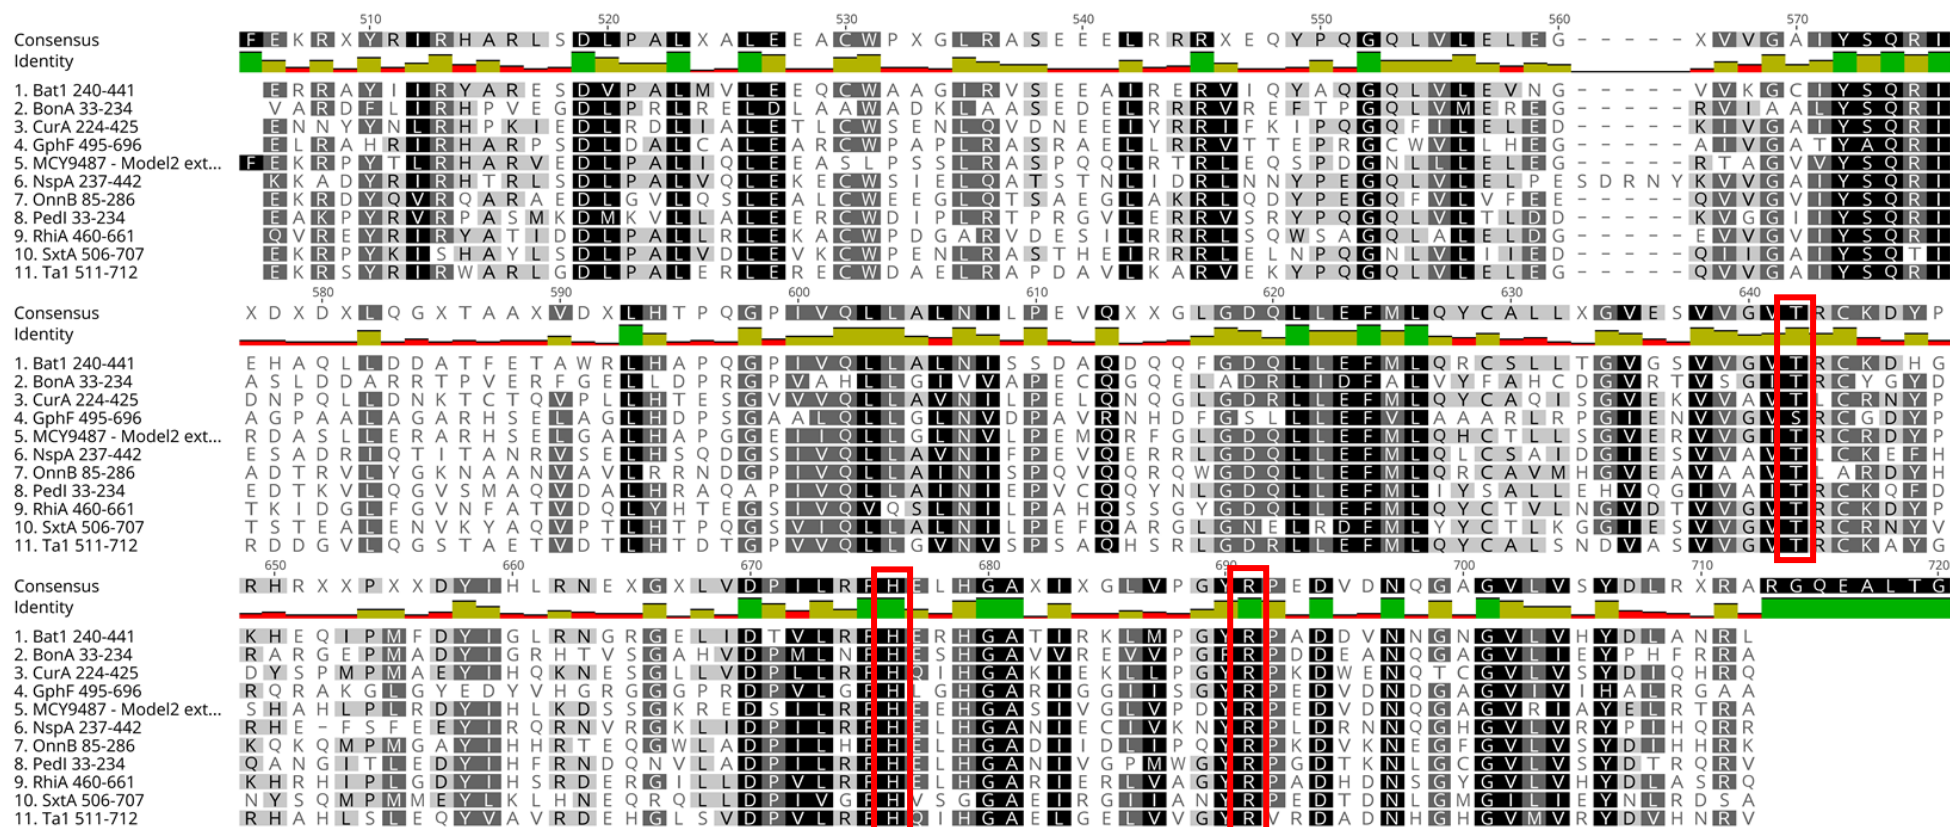

**Figure 15** Alignment of GNAT domains from the thiamyxin (MCY9487 – Model 2), Gephyronic acid (GphF), Curacin A (CurA), Batumin (Bat1), Bongkreic acid (BonA), Nosperin (NspA), Onnamide (OnnB), Pederin (Pedl), Rhizoxin (RhiA), Saxitoxin (SxtA) and Myxovirescin A (Ta1) gene cluster, as performed by Skiba *et al.*<sup>[10]</sup> The conserved histidine, arginine and threonine required for decarboxylation are marked in red.



## 2.4.5 Phylogenetic analysis of C domains

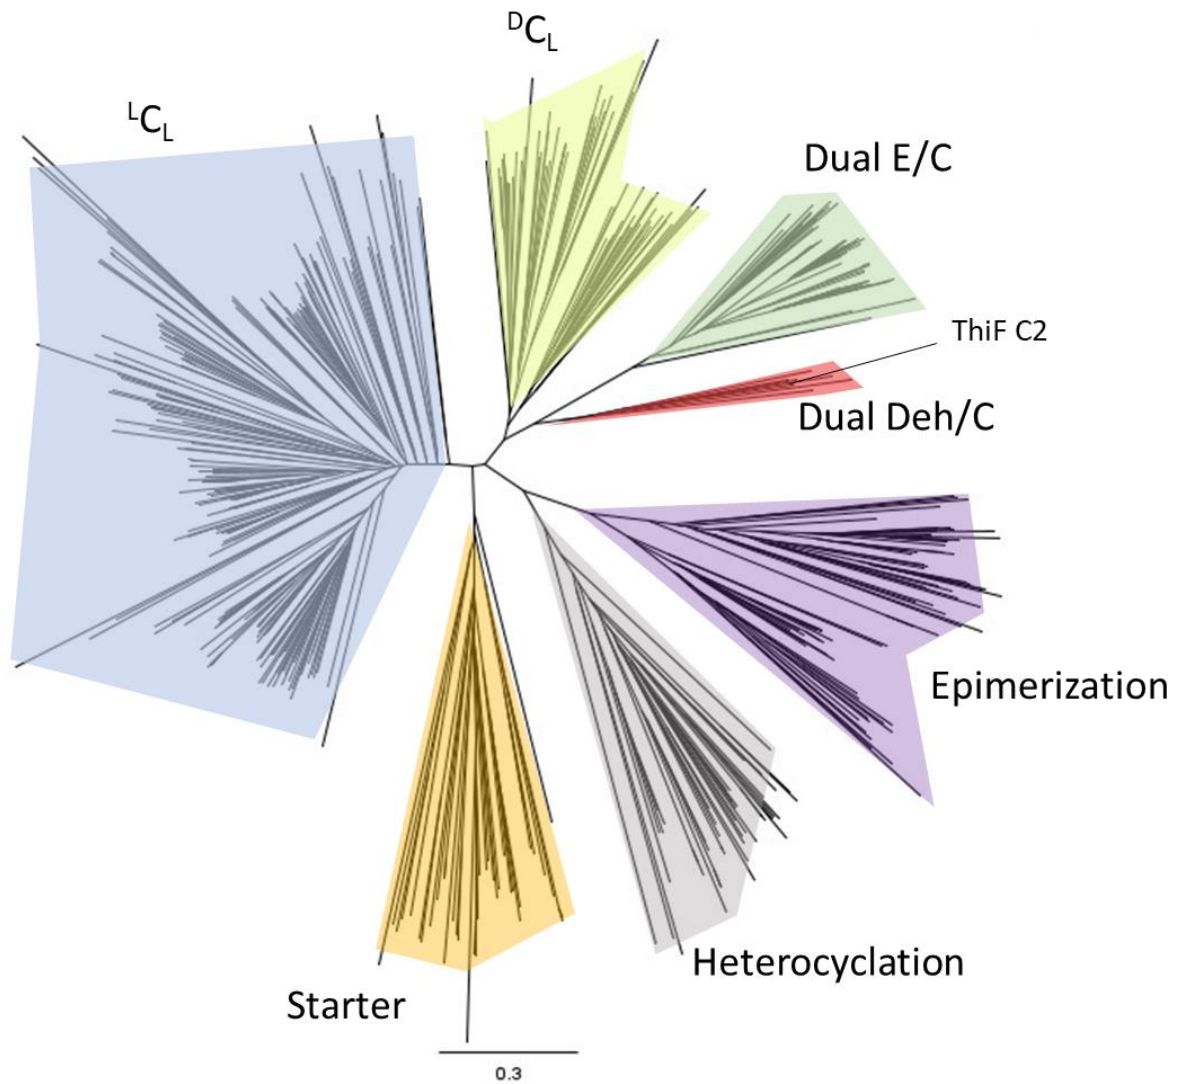

**Figure 16** Phylogenetic tree of different C domain subtypes as previously described by Pogorevc et al.<sup>[11]</sup> Phylogenetic tree of all known C domain subtypes (LCL, DCL, Starter, Dual E/C, Epimerization and Heterocyclization domains), with the new Dual Deh/C subtype highlighted in red. The phylogeny was reconstructed using phymI, employing the JTT model of amino acid substitution and a gamma-distributed rate variation with four categories. The support values are based on 100-fold bootstrapping. The C domain list includes 525 domains from phylogenetic study by Rausch et. al.,<sup>[12]</sup> 10 C domains from the thiamyxin biosynthesis, as well as selected C domain examples from  $\alpha,\beta$ -dehydro amino acid forming pathways: bleomycin (blmVI; Q9FB23), burriogladin (BgdA; MH170348), haerogladin (HgdA, MH170356), nocardicin (NocB; Q5J1Q6), hassallidin (HasO; K7VZQ9), syringomycin (SyrE; O85168), stenothricin (StenS; EFE73312.1). The C domain of module 10 of the thiamyxin biosynthesis encoded on *thiF*, belongs to the clade of dehydrating C domains.

## 2.5 Feeding Experiments

The isotopic patterns of the thiamyxins for the serine- $d_3$  supplemented cultures show intensified peaks at +2 Da, +3 Da, +4 Da and +5 Da compared to the monoisotopic peak, indicating 2 deuterium-labelled serine incorporations, one of which is reduced to dehydroalanine. The isotopic pattern of the thiamyxins for the Valine- $d_8$  supplemented culture show intensified peaks at +7 Da, +8 Da and +9 Da compared to the monoisotopic peak, indicating a deuterium-labelled valine incorporation. The alpha deuterium is acidic and exchanges with hydrogen in aqueous conditions which causes the +7 Da signal.



The isotopic patterns for the methionine-(methyl-<sup>13</sup>C) supplemented cultures show intensified peaks at +1 - +9 Da, indicating up to 7 methylations (see Figure 17).

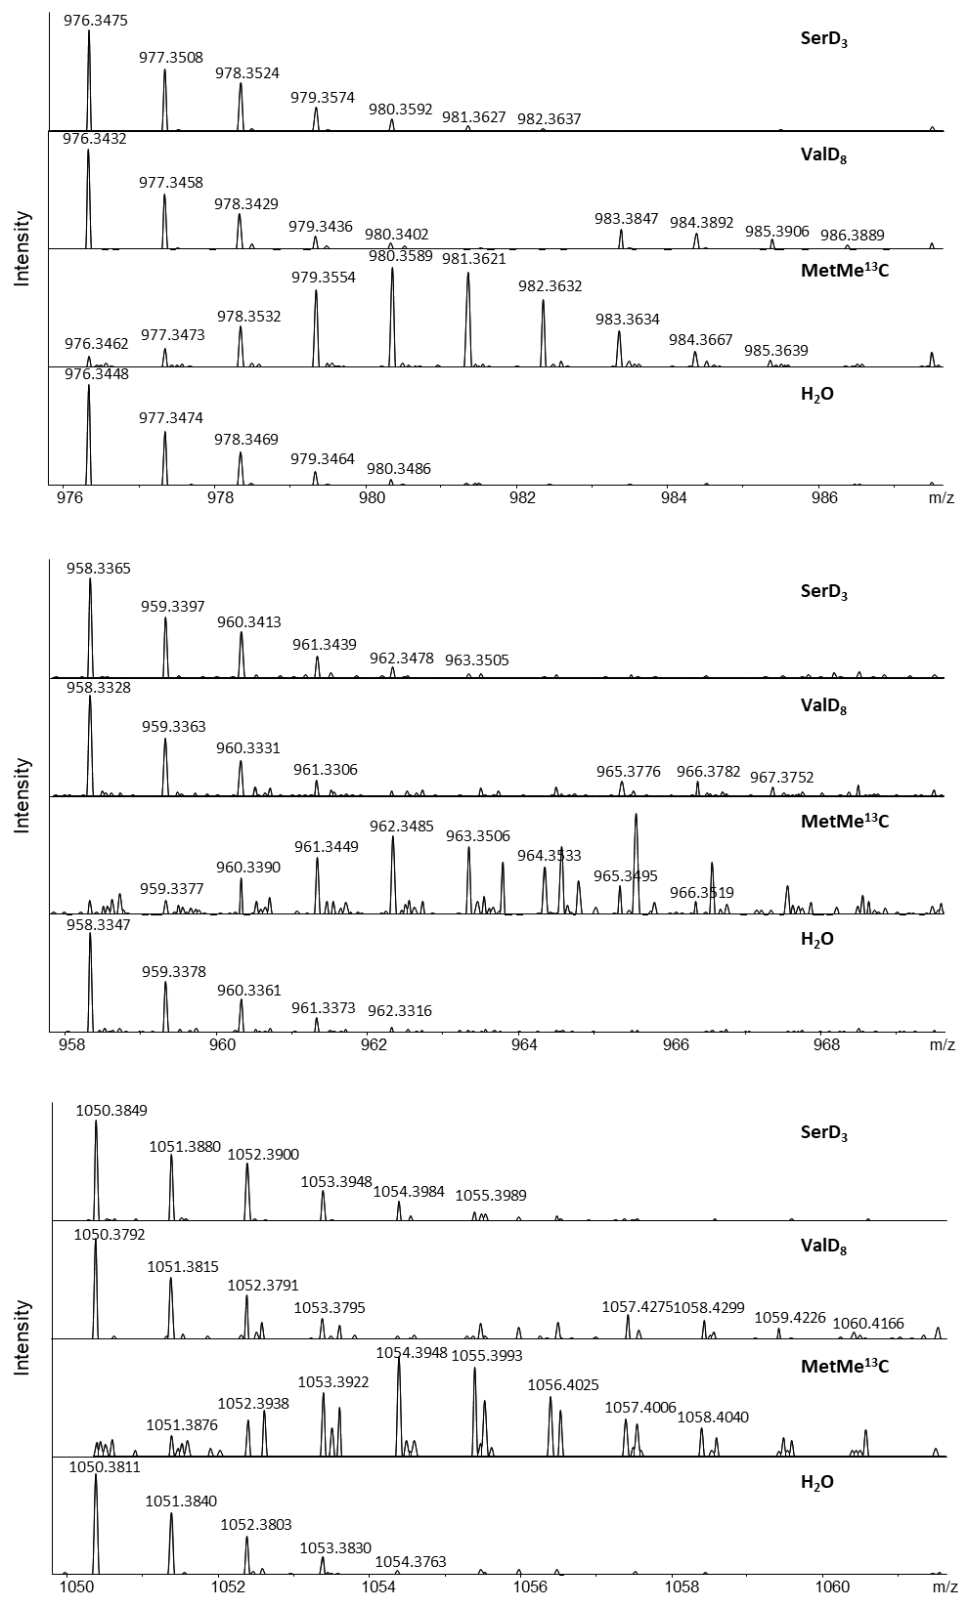

**Figure 17** Zoomed in mass spectra for thiamyxin C (top), thiamyxin A/B (middle) and thiamyxin D (bottom) with L-serine-2,3,3-d<sub>3</sub>, L-valine-d<sub>8</sub>, and L-methionine-(methyl-<sup>13</sup>C) feeding and control.

## 2.6 Antimicrobial activities

All thiamyxins except congener A, which was only produced in low amounts, were tested against two Gram-positive and two fungal pathogens. They were only found to have weak effects on our test panel with MIC values higher than 32  $\mu\text{g}/\text{mL}$  (see Table 4).

**Table 4** Antimicrobial activities of the thiamyxins.

| Test organism                      | MIC [ $\mu\text{g}/\text{mL}$ ] |             |             |             |
|------------------------------------|---------------------------------|-------------|-------------|-------------|
|                                    | thiamyxin A                     | thiamyxin B | thiamyxin C | thiamyxin D |
| <i>Bacillus subtilis</i> DSM-10    | nd                              | > 64        | 64          | > 64        |
| <i>Mucor hiemalis</i> DSM-2656     | nd                              | > 64        | 64          | > 64        |
| <i>Candida. albicans</i> DSM-1665  | nd                              | 64          | > 64        | > 64        |
| <i>Micrococcus luteus</i> DSM-1790 | nd                              | > 64        | 32          | > 64        |

## 2.7 Antiviral activities

Half maximal inhibitory concentrations ( $\text{IC}_{50}$ ) values presented in the main text were calculated based on the following curves determined for the inhibition of the respective virus (Figure 18-25). Half maximal cytotoxic concentration ( $\text{CC}_{50}$ ) values presented here were determined simultaneously in the infected cell lines to see if the observed antiviral effects are overlapping with effects on the cell lines.  $\text{IC}_{50}$  values shown in the manuscript were determined in an independent experiment to circumvent effects of the viral infections on the cell lines.

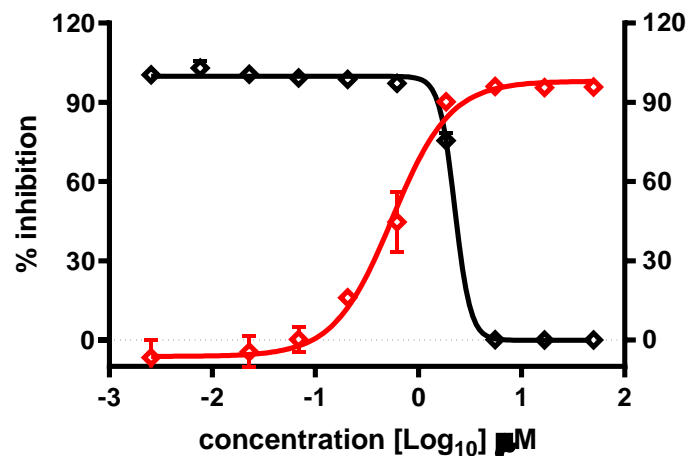

**Figure 18** Inhibition of DENV-R2A (red,  $\text{IC}_{50} = 0.56 \mu\text{M}$ ) and effects on cell viability (black,  $\text{CC}_{50} = 2.25 \mu\text{M}$ ) of thiamyxin B.

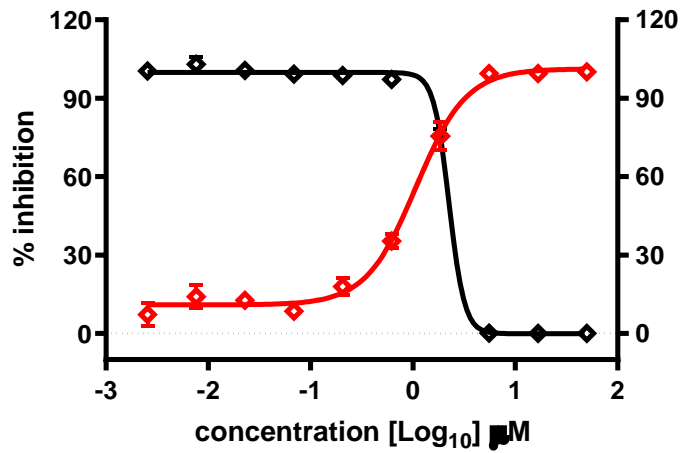

Figure 19 Inhibition of ZIKV-R2A (red,  $IC_{50} = 1.07 \mu M$ ) and effects on cell viability (black,  $CC_{50} = 2.25 \mu M$ ) of thiamyxin B.

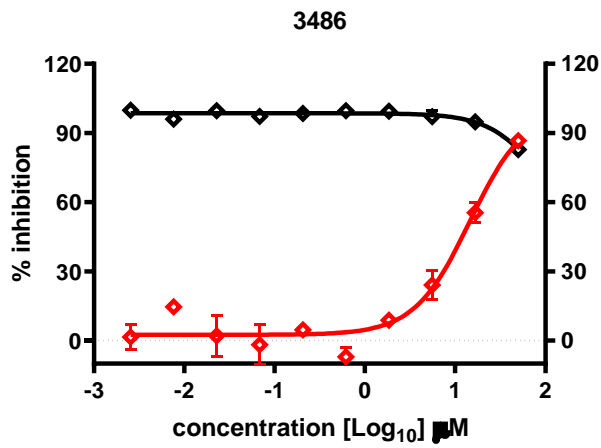

Figure 20 Inhibition of DENV-R2A (red,  $IC_{50} = 14.56 \mu M$ ) and effects on cell viability (black,  $CC_{50} = >50 \mu M$ ) of thiamyxin C.

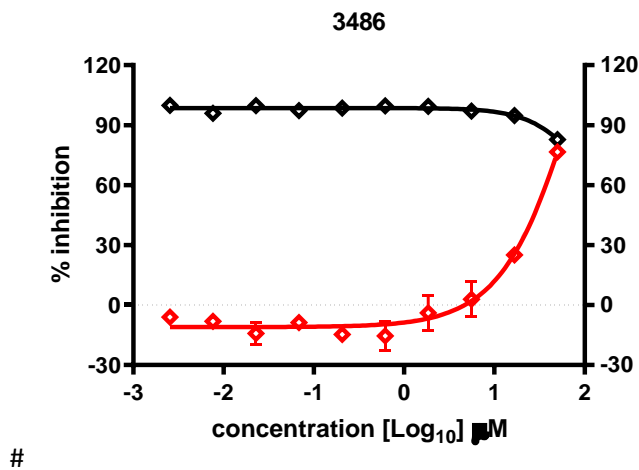

Figure 21 Inhibition of ZIKV-R2A (red,  $IC_{50} >15 \mu M$ ) and effects on cell viability (black,  $CC_{50} >50 \mu M$ ) of thiamyxin C.

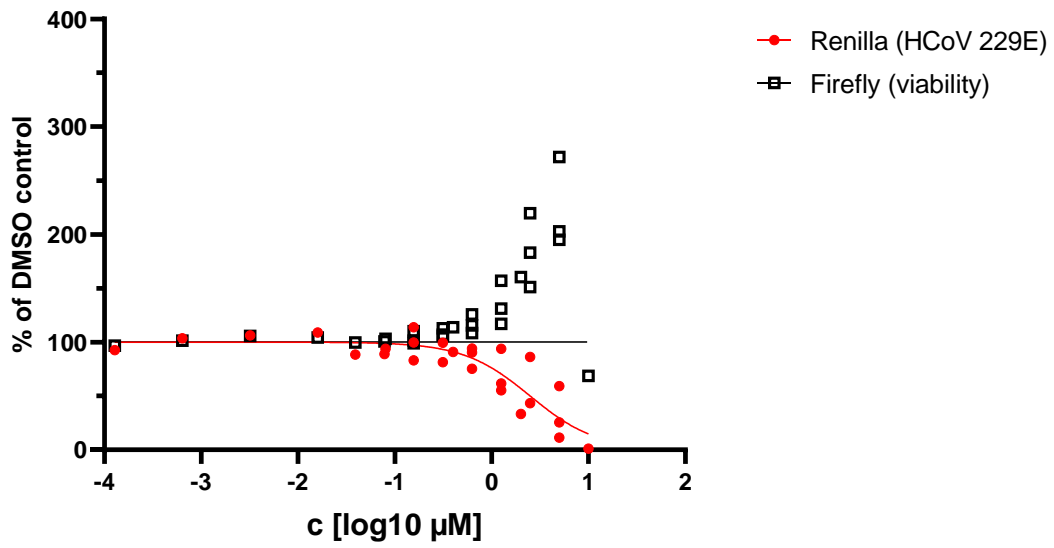

Figure 22 Inhibition of hCoV-229E-luc (red, IC<sub>50</sub> = 2.47 μM) and effects on cell viability (black, CC<sub>50</sub> >10 μM) of thiamyxin A.

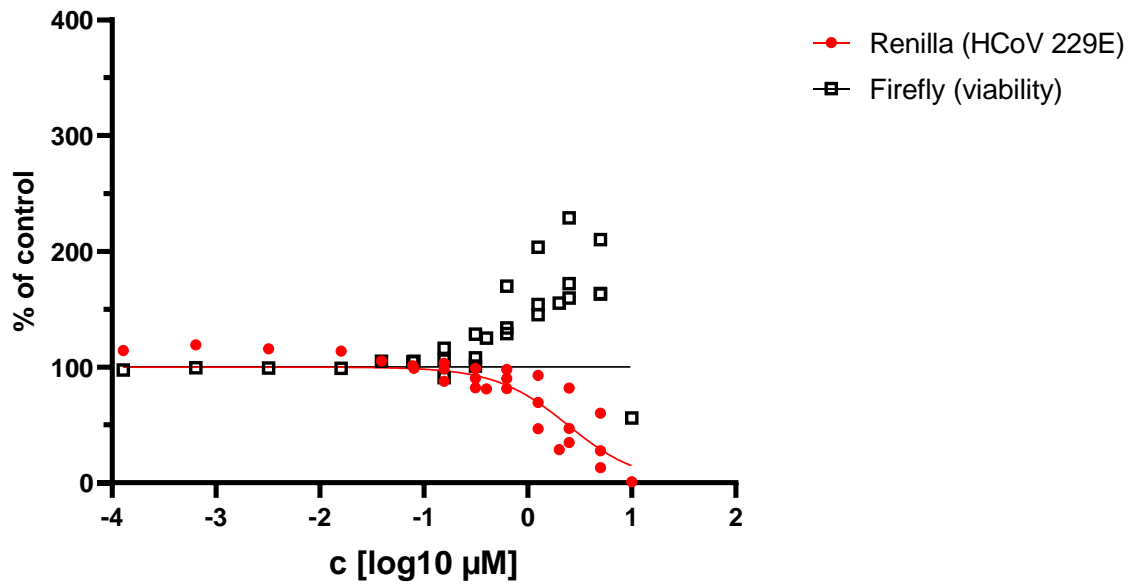

Figure 23 Inhibition of hCoV-229E-luc (red, IC<sub>50</sub> = 2.39 μM) and effects on cell viability (black, CC<sub>50</sub> >10 μM) of thiamyxin B.

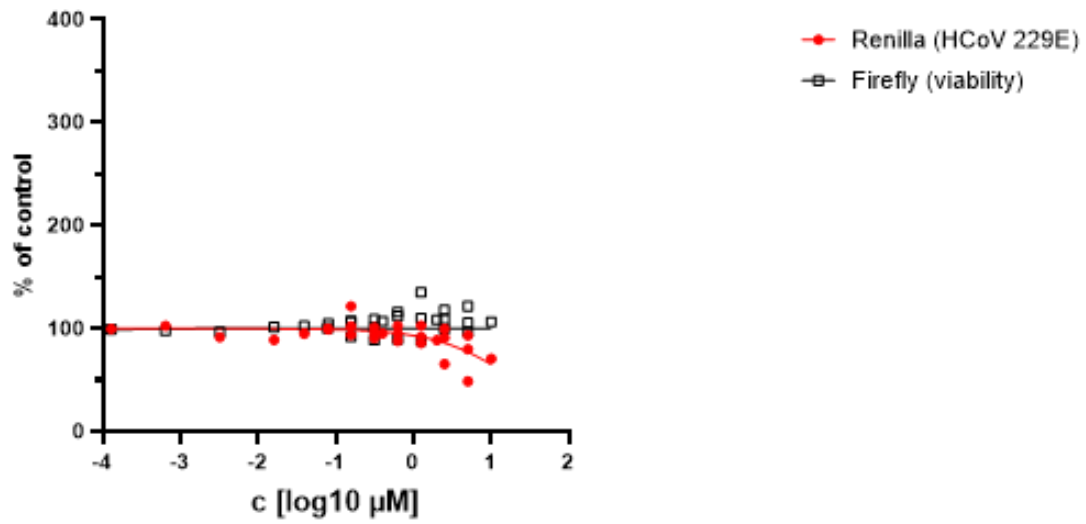

**Figure 24** Inhibition of hCoV-229E-luc (red,  $IC_{50} \sim 20.52 \mu\text{M}$ ) and effects on cell viability (black,  $CC_{50} > 10 \mu\text{M}$ ) of thiamyxin C.

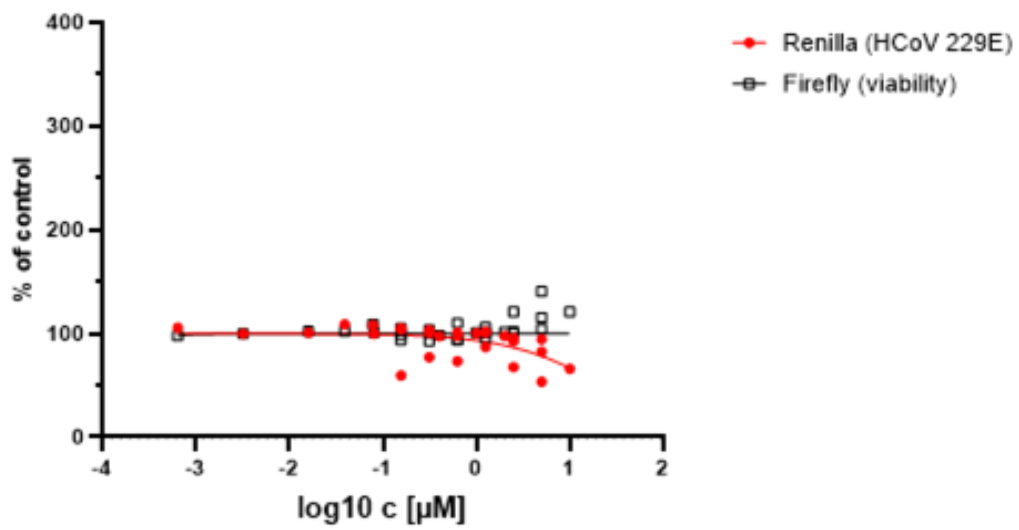

**Figure 25** Inhibition of hCoV-229E-luc (red,  $IC_{50} \sim 23.06 \mu\text{M}$ ) and effects on cell viability (black,  $CC_{50} > 10 \mu\text{M}$ ) of thiamyxin D.

## 2.8 NMR data

### 2.8.1 Thiamyxin B

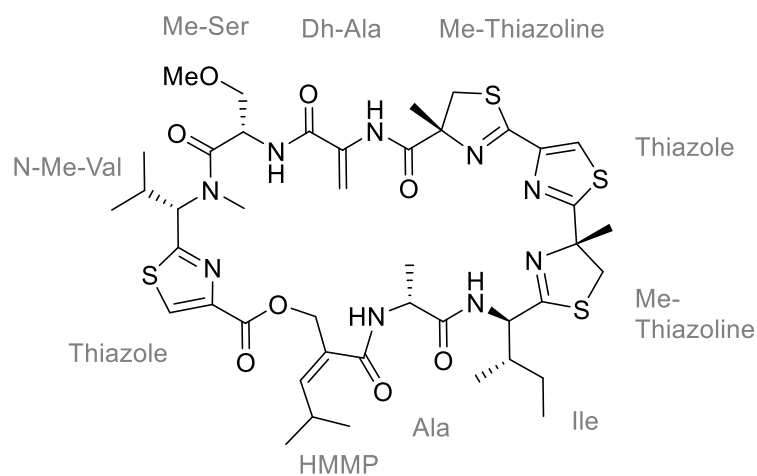

**Table 5** NMR spectroscopic data of thiamyxin B in DMSO- $d_6$  at 700/175 MHz.

| position    | NMR data in DMSO- $d_6$ |                         |                   |                             |
|-------------|-------------------------|-------------------------|-------------------|-----------------------------|
|             | $\delta_C$              | $\delta_H$ ( $J$ in Hz) | COSY correlations | HMBC correlations           |
| <i>HMMP</i> |                         |                         |                   |                             |
| 1           | 165.8                   | -                       | -                 | -                           |
| 2           | 129.2                   | -                       | -                 | -                           |
| 2'          | 67.0                    | 4.90, 4.86, d (12.1)    | 3                 | 1, 2, 3, <i>Thiazole</i> -1 |
| 3           | 146.6                   | 5.83, s                 | 2', 4             | 1, 2, 2', 4, 4', 5          |
| 4           | 27.8                    | 2.83, dq (16.4, 6.7)    | 3, 4', 5          | 2, 3, 4', 5                 |
| 4'          | 22.2                    | 0.96, d (6.6)           | 4, 5              | 3, 4, 5                     |
| 5           | 22.2                    | 0.96, d (6.6)           | 4, 4'             | 3, 4, 4'                    |
| <i>Ala</i>  |                         |                         |                   |                             |
| 1           | 171.6                   | -                       | -                 | -                           |
| 2           | 47.6                    | 4.61, quin (7.0)        | 3, NH             | 1, 3, <i>HMMP</i> -1        |
| 3           | 19.4                    | 1.36, m*                | 2                 | 1, 2                        |
| NH          | -                       | 7.51, bd (7.7)          | 2                 | -                           |
| <i>Ile</i>  |                         |                         |                   |                             |

|                            |       |                       |          |                               |
|----------------------------|-------|-----------------------|----------|-------------------------------|
| 1                          | 173.1 | -                     | -        | -                             |
| 2                          | 53.6  | 4.78, dd (9.4, 4.7)   | 3, NH    | 1, 3, 3', 4, <i>Ala</i> -1    |
| 3                          | 37.5  | 1.91, m               | 2, 3', 4 | 1, 2, 3', 4, 5                |
| 3'                         | 14.2  | 0.93, dd (10.5, 6.8)  | 3        | 2, 3, 4, 5                    |
| 4                          | 25.9  | 1.36, 1.21, m*        | 3, 5     | 3', 3, 5                      |
| 5                          | 11.4  | 0.87, t (7.4)         | 4        | 3, 4                          |
| NH                         | -     | 8.30, m*              | 2        | 2, <i>Ala</i> -1              |
| <hr/> <i>Me-thiazoline</i> |       |                       |          |                               |
| 1                          | 176.5 | -                     | -        | -                             |
| 2                          | 83.3  | -                     | -        | -                             |
| 3                          | 43.3  | 3.74, dd (11.8, 39.7) | -        | 1, 2, Me, <i>Ile</i> -1       |
| Me                         | 28.3  | 1.65, s               | -        | 1, 2, 3                       |
| <hr/> <i>Thiazole</i>      |       |                       |          |                               |
| 1                          | 163.8 | -                     | -        | -                             |
| 2                          | 147.5 | -                     | -        | -                             |
| 3                          | 122.5 | 8.30, s*              | -        | 1, 2, <i>Me-thiazoline</i> -1 |
| <hr/> <i>Me-thiazoline</i> |       |                       |          |                               |
| 1                          | 172.9 | -                     | -        | -                             |
| 2                          | 84.9  | -                     | -        | -                             |
| 3                          | 40.7  | 3.38, 3.81, d (11.7)  | -        | 1, 2, Me, <i>Thiazole</i> -1  |
| Me                         | 25.5  | 1.59, s               | -        | 1, 2, 3                       |
| <hr/> <i>Dh-Ala</i>        |       |                       |          |                               |
| 1                          | 163.1 | -                     | -        | -                             |
| 2                          | 132.7 | -                     | -        | -                             |
| 3                          | 102.6 | 6.37 s, 5.81 s        | NH       | 1, 2                          |
| NH                         | -     | 9.36, s               | 3        | 1, 3, <i>Me-Thiazoline</i> -1 |

| <i>Me-Ser</i>   |       |                |          |                          |
|-----------------|-------|----------------|----------|--------------------------|
| 1               | 170.6 | -              | -        | -                        |
| 2               | 49.5  | 4.89, m*       | 3, NH    | 1, 3, <i>Dh-Ala</i> -1   |
| 3               | 71.0  | 3.59, m        | 2        | 1, 3, OMe                |
| OMe             | 58.4  | 3.19, s        | -        | 3                        |
| NH              | -     | 8.97           | 2        | 2, 3, <i>Dh-Ala</i> -1   |
| <i>N-Me-Val</i> |       |                |          |                          |
| 1               | 168.3 | -              | -        | -                        |
| 2               | 59.7  | 5.31, bd (8.6) | 3        | nd                       |
| 3               | 27.8  | 2.36, m        | 2, 3', 4 | 4, nd                    |
| 3'              | 18.3  | 0.38, d (6.4)  | 4        | 2, 3, 4                  |
| 4               | 20.1  | 0.71, d (6.4)  | 3'       | 2, 3, 3'                 |
| NMe             | 30.2  | 2.90, s        | -        | 2, <i>Me-Ser</i> -1      |
| <i>Thiazole</i> |       |                |          |                          |
| 1               | 160.5 | -              | -        | -                        |
| 2               | 145.2 | -              | -        | -                        |
| 3               | 130.6 | 8.57, s        | -        | 1, 2, <i>N-Me-Val</i> -1 |

\* overlapping signals circumvent exact assignment

nd = not detectable



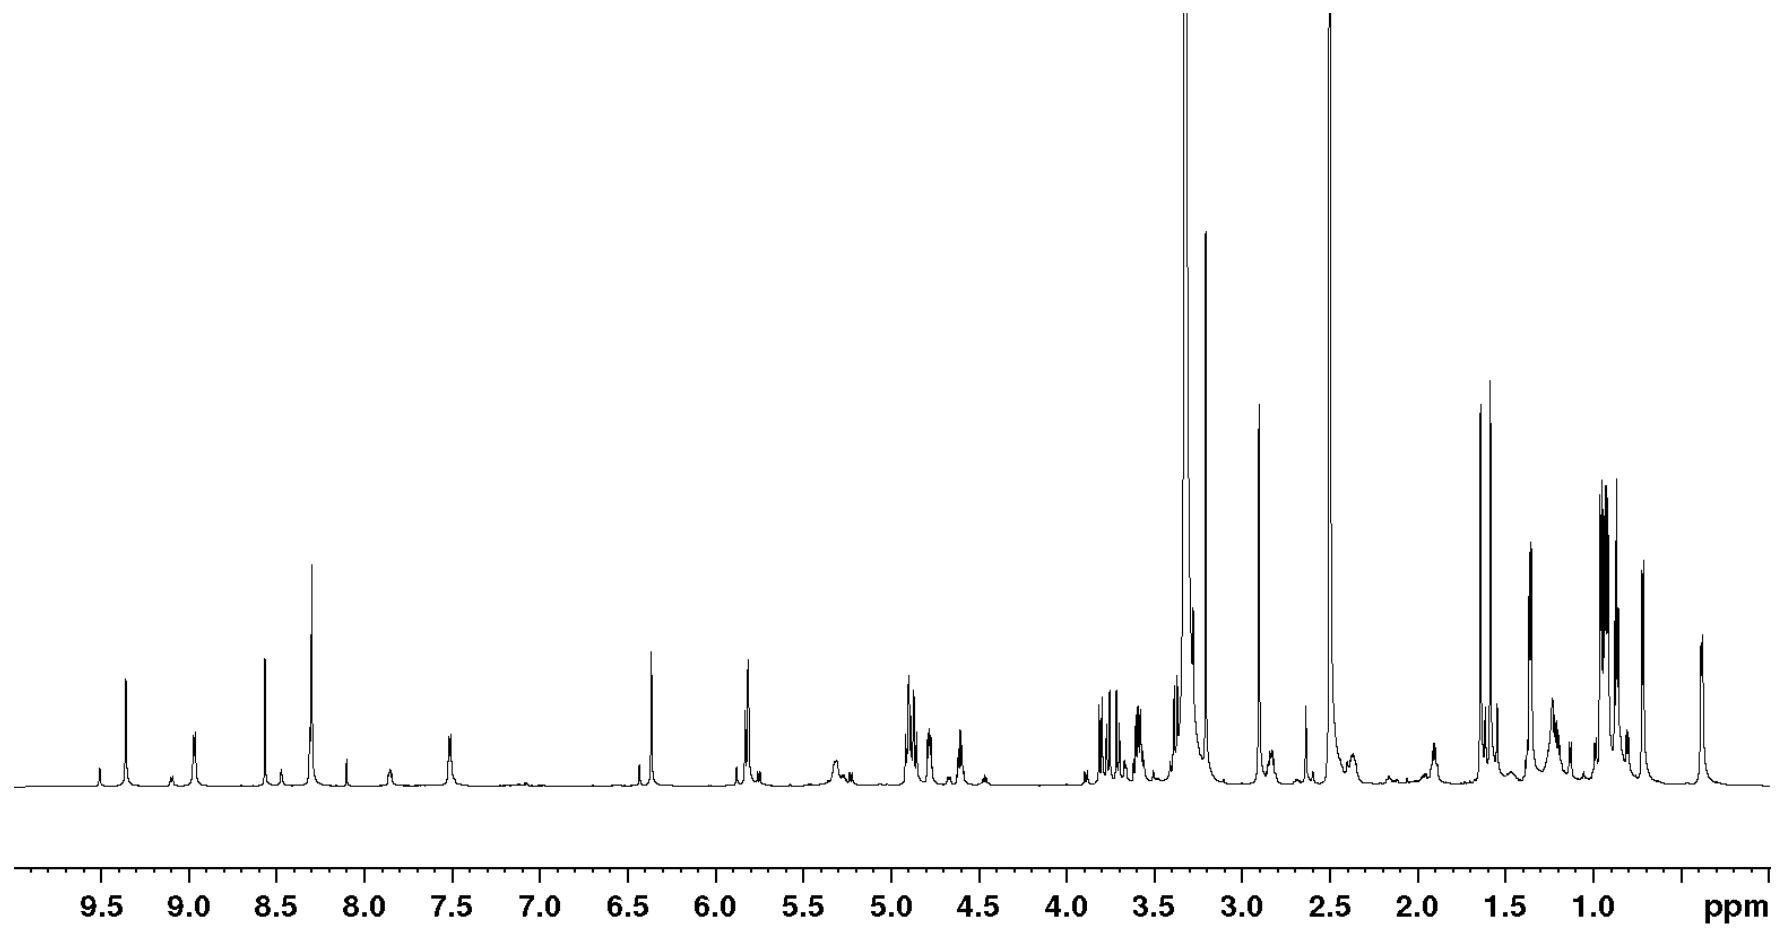

Figure 26  $^1\text{H}$  spectrum of thiamyxin B in  $\text{DMSO-}d_6$  at 700 MHz.

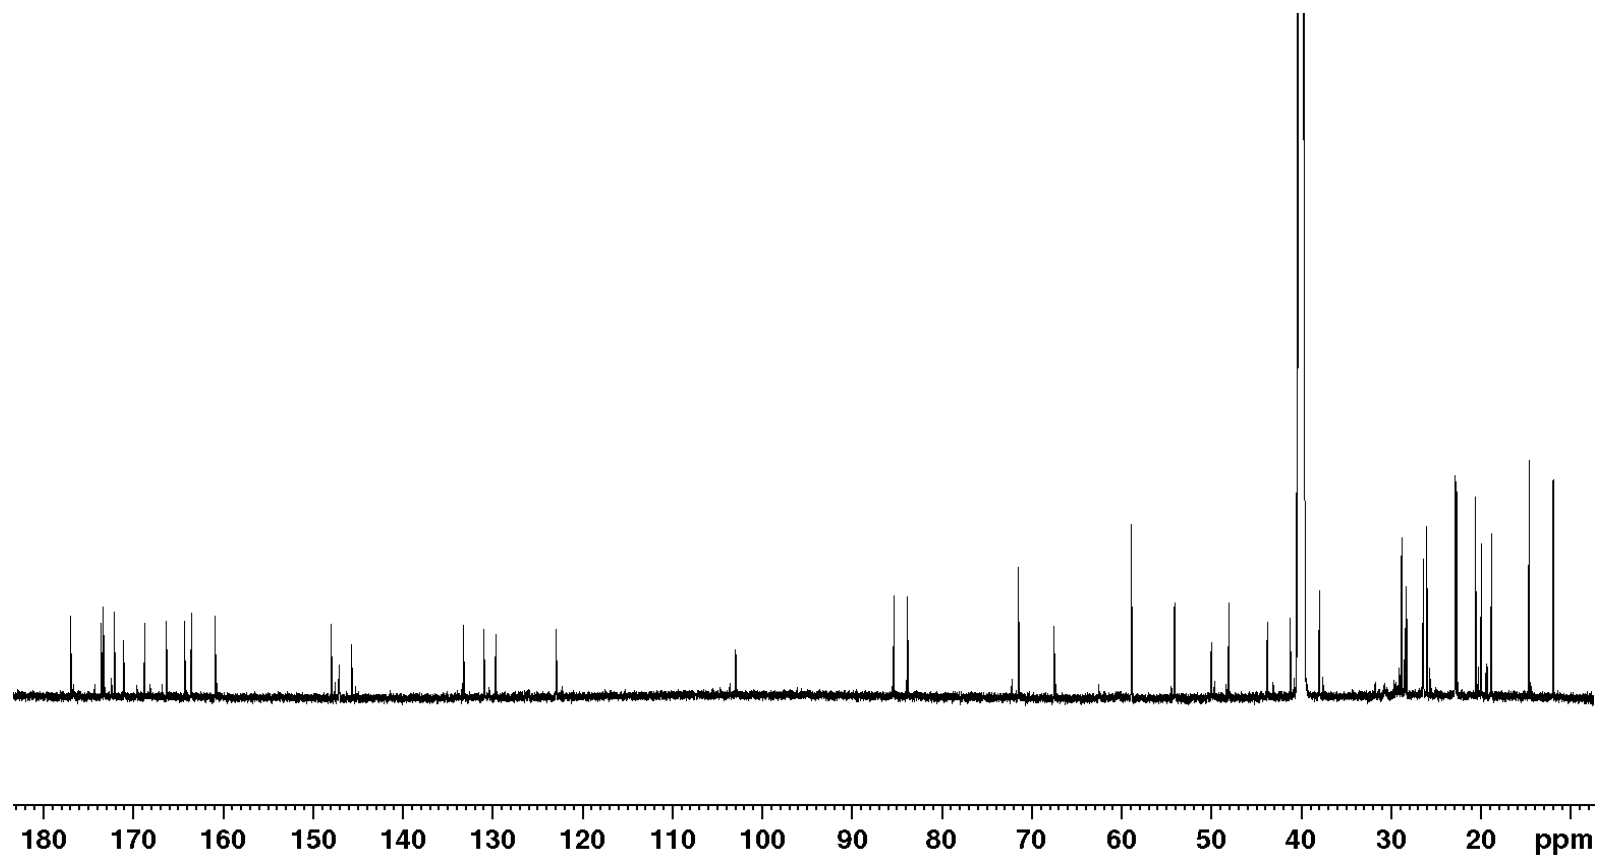

Figure 27  $^{13}\text{C}$  spectrum of thiamyxin B in  $\text{DMSO-}d_6$  at 175 MHz.

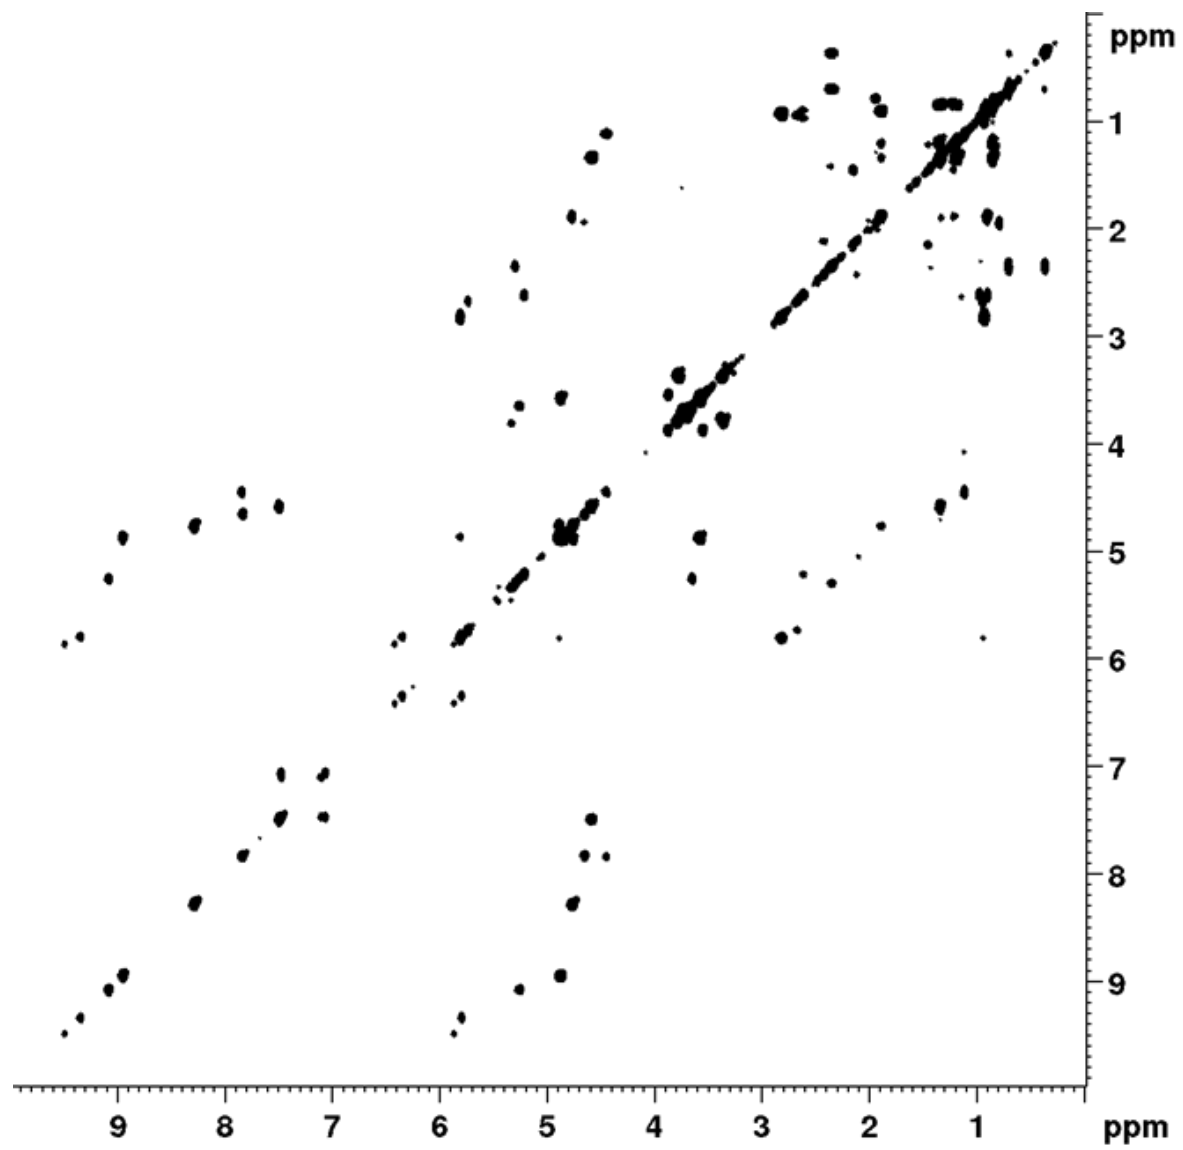

Figure 28 COSY spectrum of thiamyxin B in DMSO-*d*<sub>6</sub> at 700 MHz.

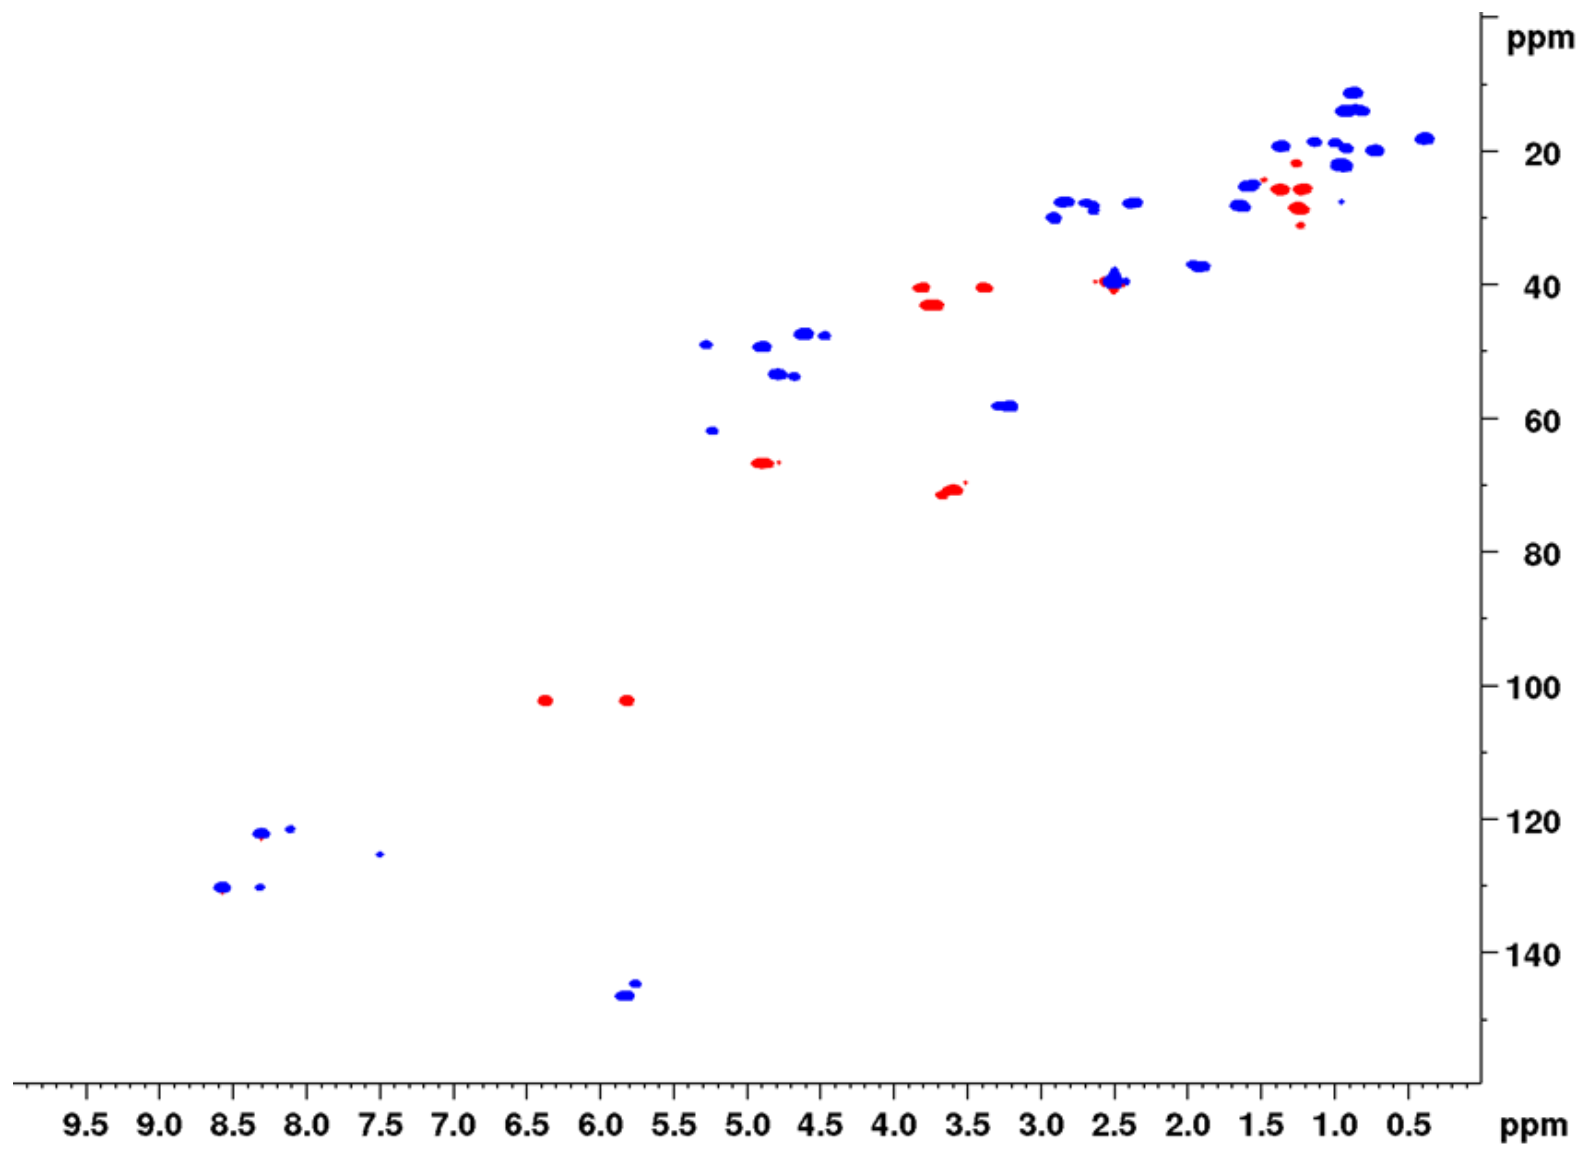

Figure 29 HSQC spectrum of thiamyxin B in DMSO-*d*<sub>6</sub> at 700/175 MHz.

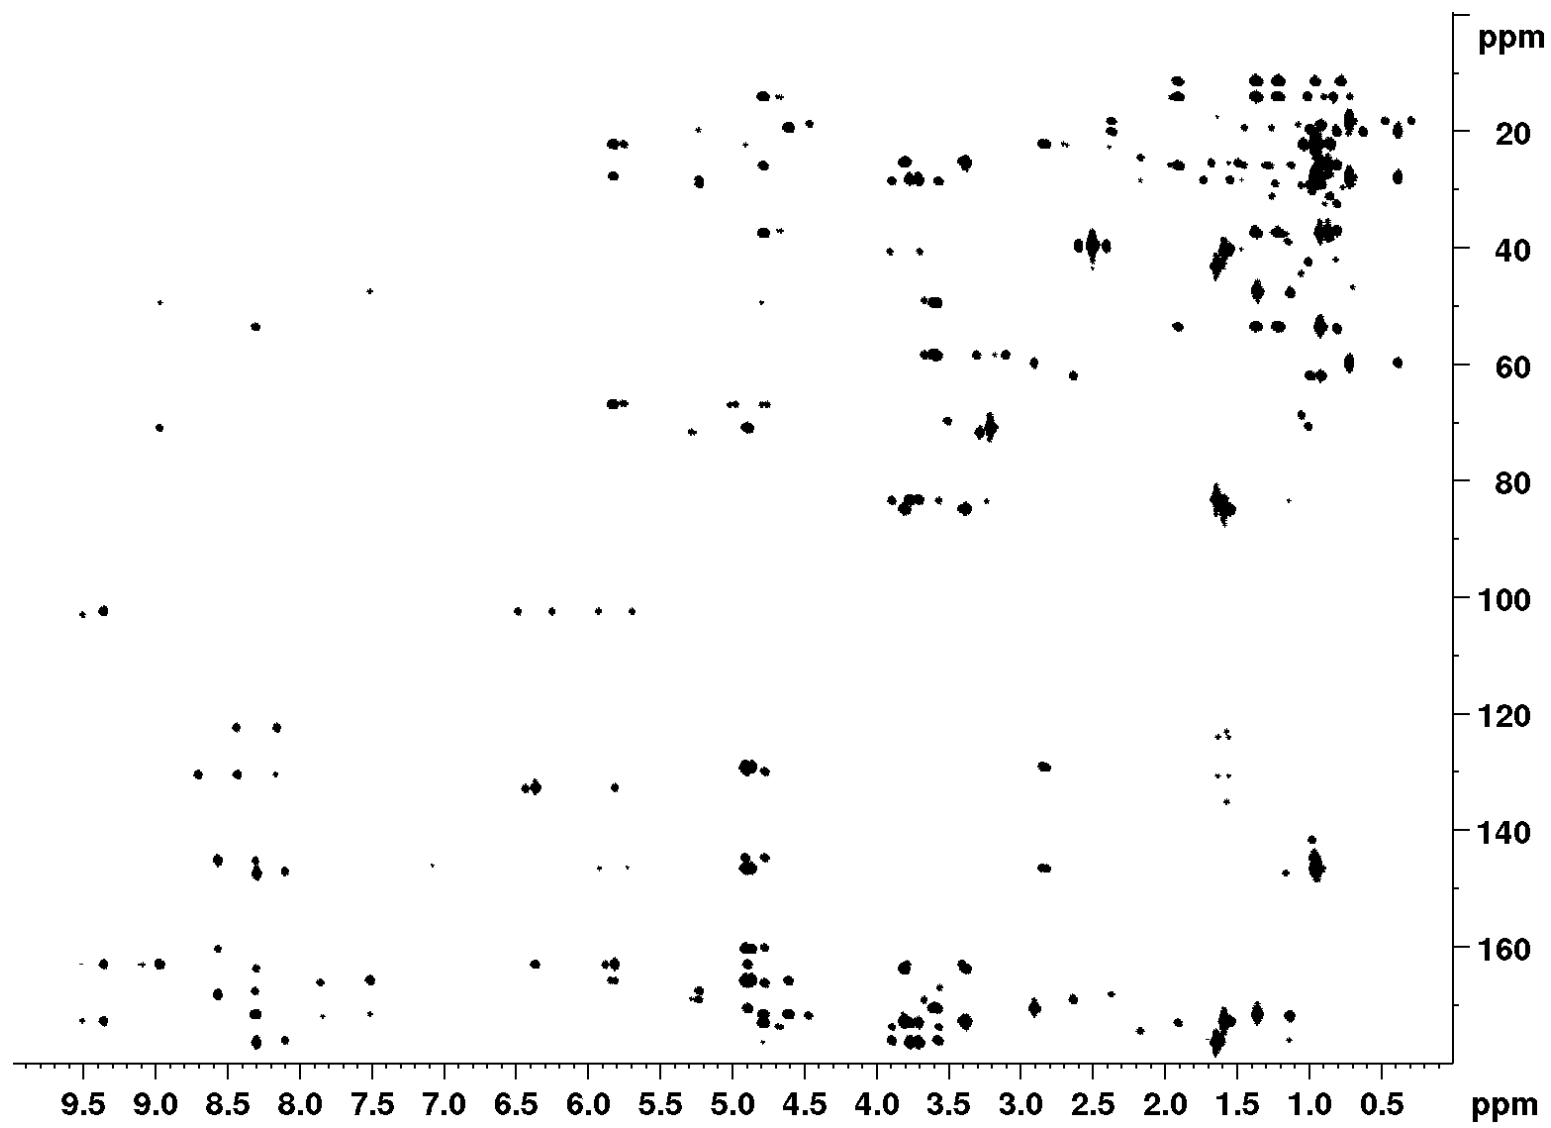

Figure 30 HMBC spectrum of thiamyxin B in DMSO-*d*<sub>6</sub> at 700/175 MHz.

## 2.8.2 Thiamyxin A

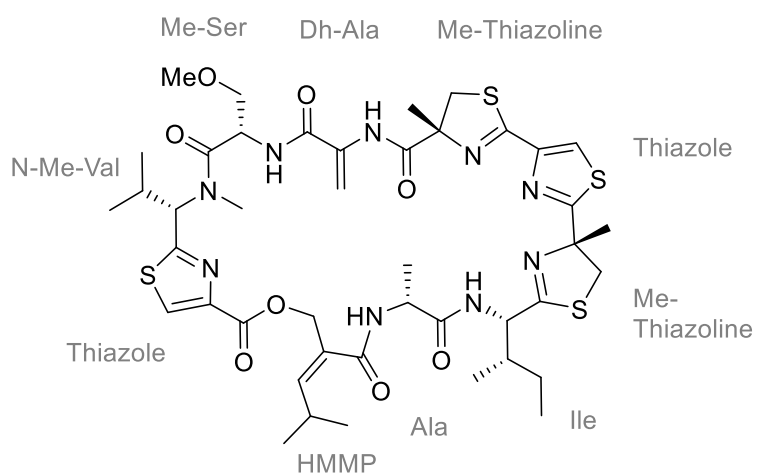

**Table 6** NMR spectroscopic data of thiamyxin A in DMSO- $d_6$  at 500/125 MHz.

| position    | NMR data in DMSO- $d_6$ |                         |                   |                             |
|-------------|-------------------------|-------------------------|-------------------|-----------------------------|
|             | $\delta_C$              | $\delta_H$ ( $J$ in Hz) | COSY correlations | HMBC correlations           |
| <i>HMMP</i> |                         |                         |                   |                             |
| 1           | 165.6                   | -                       | -                 | -                           |
| 2           | 129.8                   | -                       | -                 | -                           |
| 2'          | 65.9                    | 4.81, 4.92, d (12.8)    | 3                 | 1, 2, 3, <i>Thiazole</i> -1 |
| 3           | 142.6                   | 5.76, d (10.0)          | 2', 4             | 1, 2, 2', 4, 4', 5          |
| 4           | 27.6                    | 2.70, m                 | 3, 4', 5          | 2, 3, 4', 5                 |
| 4'          | 22.4                    | 0.92, m*                | 4, 5              | 3, 4, 5                     |
| 5           | 22.4                    | 0.92, m*                | 4, 4'             | 3, 4, 4'                    |
| <i>Ala</i>  |                         |                         |                   |                             |
| 1           | 171.6                   | -                       | -                 | -                           |
| 2           | 48.4                    | 4.42, quin (6.8)        | 3, NH             | 1, 3, <i>HMMP</i> -1        |
| 3           | 19.0                    | 1.20, bd (7.0)          | 2                 | 1, 2                        |
| NH          | -                       | 7.83, d (8.0)           | 2                 | -                           |
| <i>Ile</i>  |                         |                         |                   |                             |
| 1           | 174.6                   | -                       | -                 | -                           |

|                            |       |                      |          |                       |
|----------------------------|-------|----------------------|----------|-----------------------|
| 2                          | 55.8  | 4.64, dd (8.8, 8.8)  | 3, NH    | 1, 3, 3', 4, Ala-1    |
| 3                          | 37.0  | 1.82, m              | 2, 3', 4 | 1, 2, 3', 4, 5        |
| 3'                         | 15.1  | 0.91, dd (10.5, 6.8) | 3        | 2, 3, 4, 5            |
| 4                          | 24.3  | 1.49, 1.19, m*       | 3, 5     | 3', 3, 5              |
| 5                          | 10.4  | 0.85, t (7.4)        | 4        | 3, 4                  |
| NH                         | -     | 8.26, d (8.8)        | 2        | 2, Ala-1              |
| <hr/> <i>Me-thiazoline</i> |       |                      |          |                       |
| 1                          | 176.1 | -                    | -        | -                     |
| 2                          | 82.8  | -                    | -        | -                     |
| 3                          | 43.4  | 3.63, 3.50, m*       | -        | 1, 2, Me, Ile-1       |
| Me                         | 27.2  | 1.67, s              | -        | 1, 2, 3               |
| <hr/> <i>Thiazole</i>      |       |                      |          |                       |
| 1                          | 163.7 | -                    | -        | -                     |
| 2                          | 147.9 | -                    | -        | -                     |
| 3                          | 121.9 | 8.26, s*             | -        | 1, 2, Me-thiazoline-1 |
| <hr/> <i>Me-thiazoline</i> |       |                      |          |                       |
| 1                          | 172.8 | -                    | -        | -                     |
| 2                          | 84.8  | -                    | -        | -                     |
| 3                          | 40.6  | 3.37, 3.78, d (11.6) | -        | 1, 2, Me, Thiazole-1  |
| Me                         | 25.2  | 1.56, s              | -        | 1, 2, 3               |
| <hr/> <i>Dh-Ala</i>        |       |                      |          |                       |
| 1                          | 162.9 | -                    | -        | -                     |
| 2                          | 132.9 | -                    | -        | -                     |
| 3                          | 102.5 | 6.38, 5.79, s        | NH       | 1, 2                  |
| NH                         | -     | 9.28, s              | 3        | 1, 3, Me-Thiazoline-1 |
| <hr/> <i>Me-Ser</i>        |       |                      |          |                       |

|                 |       |                 |          |                          |
|-----------------|-------|-----------------|----------|--------------------------|
| 1               | 170.6 | -               | -        | -                        |
| 2               | 49.4  | 4.88, m*        | 3, NH    | 1, 3, <i>Dh-Ala</i> -1   |
| 3               | 70.8  | 3.58, m         | 2        | 1, 3, OMe                |
| OMe             | 58.3  | 3.20, s         | -        | 3                        |
| NH              | -     | 8.93            | 2        | 2, 3, <i>Dh-Ala</i> -1   |
| <hr/>           |       |                 |          |                          |
| <i>N-Me-Val</i> |       |                 |          |                          |
| 1               | 168.1 | -               | -        | -                        |
| 2               | 61.7  | 5.05, bd (10.6) | 3        | 1, 3, 3', 4              |
| 3               | 27.8  | 2.31, m         | 2, 3', 4 | 1, 3', 4                 |
| 3'              | 18.3  | 0.54, d (6.6)   | 4        | 2, 3, 4                  |
| 4               | 19.7  | 0.74, d (6.4)   | 3'       | 2, 3, 3'                 |
| NMe             | 30.0  | 2.82, s         | -        | 2, <i>Me-Ser</i> -1      |
| <hr/>           |       |                 |          |                          |
| <i>Thiazole</i> |       |                 |          |                          |
| 1               | 160.4 | -               | -        | -                        |
| 2               | 144.9 | -               | -        | -                        |
| 3               | 130.3 | 8.54, s         | -        | 1, 2, <i>N-Me-Val</i> -1 |

\* overlapping signals circumvent exact assignment

nd = not detectable



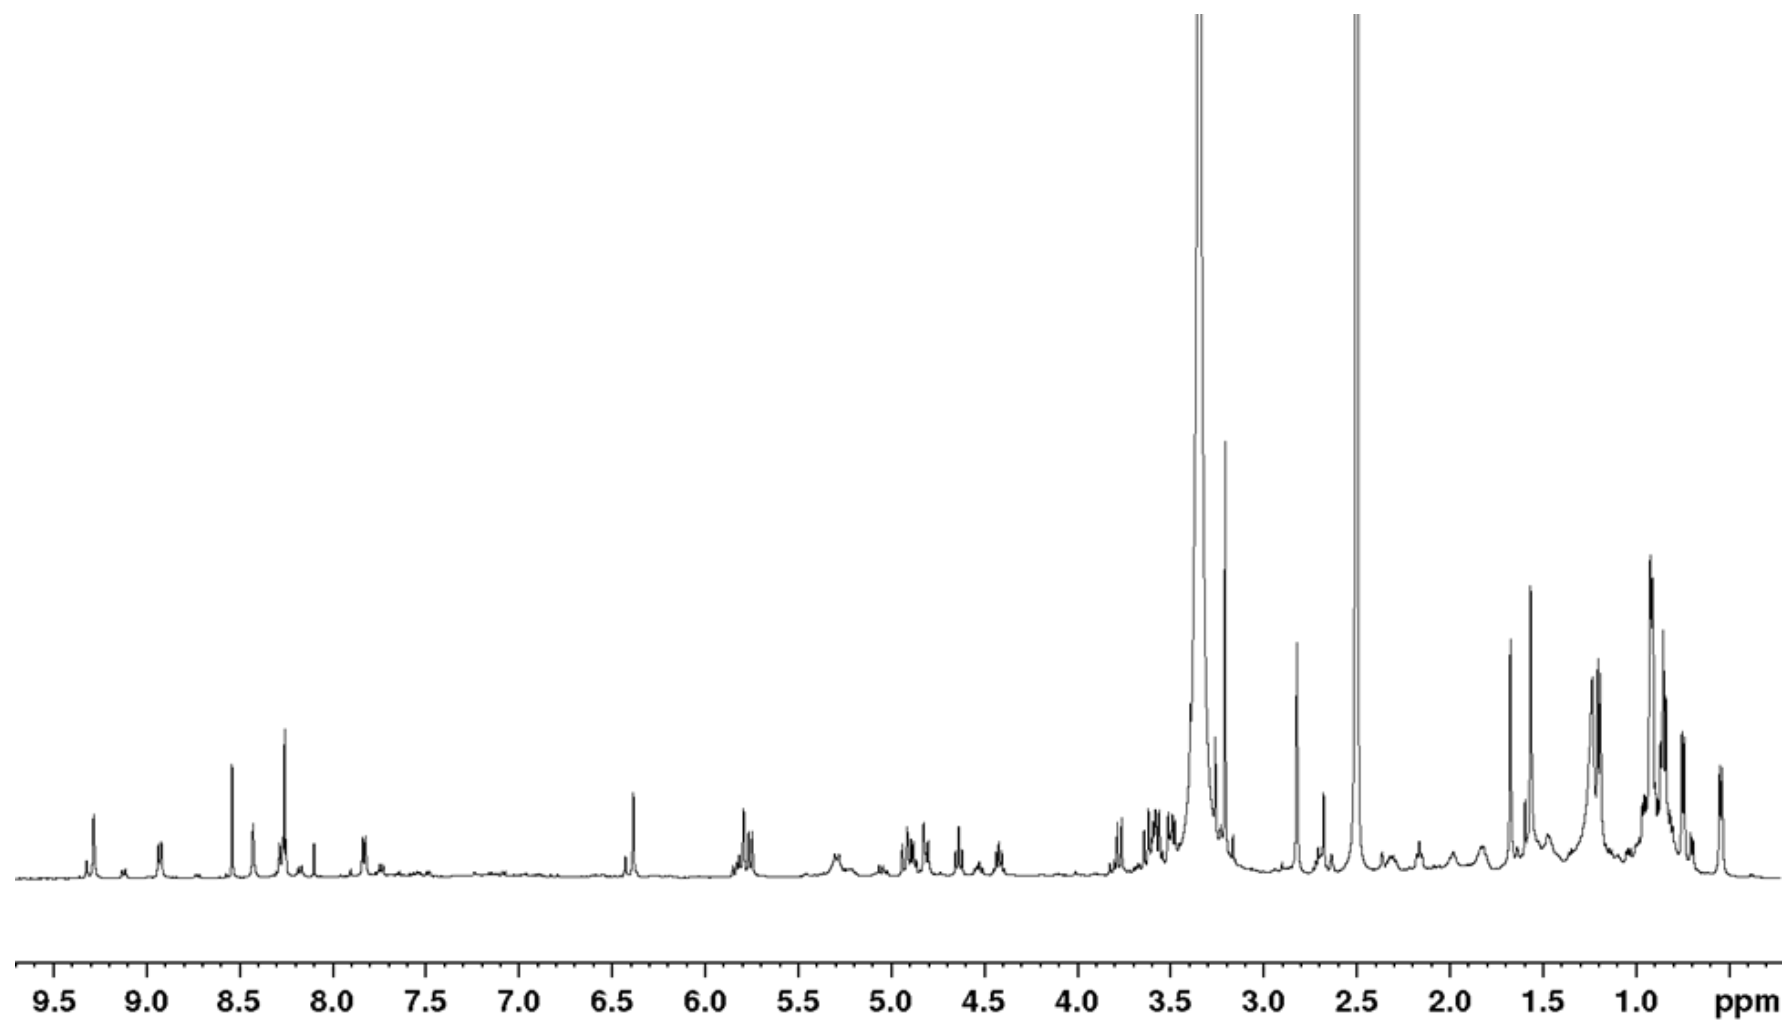

Figure 31  $^1\text{H}$  spectrum of thiamyxin A in  $\text{DMSO-}d_6$  at 500 MHz.

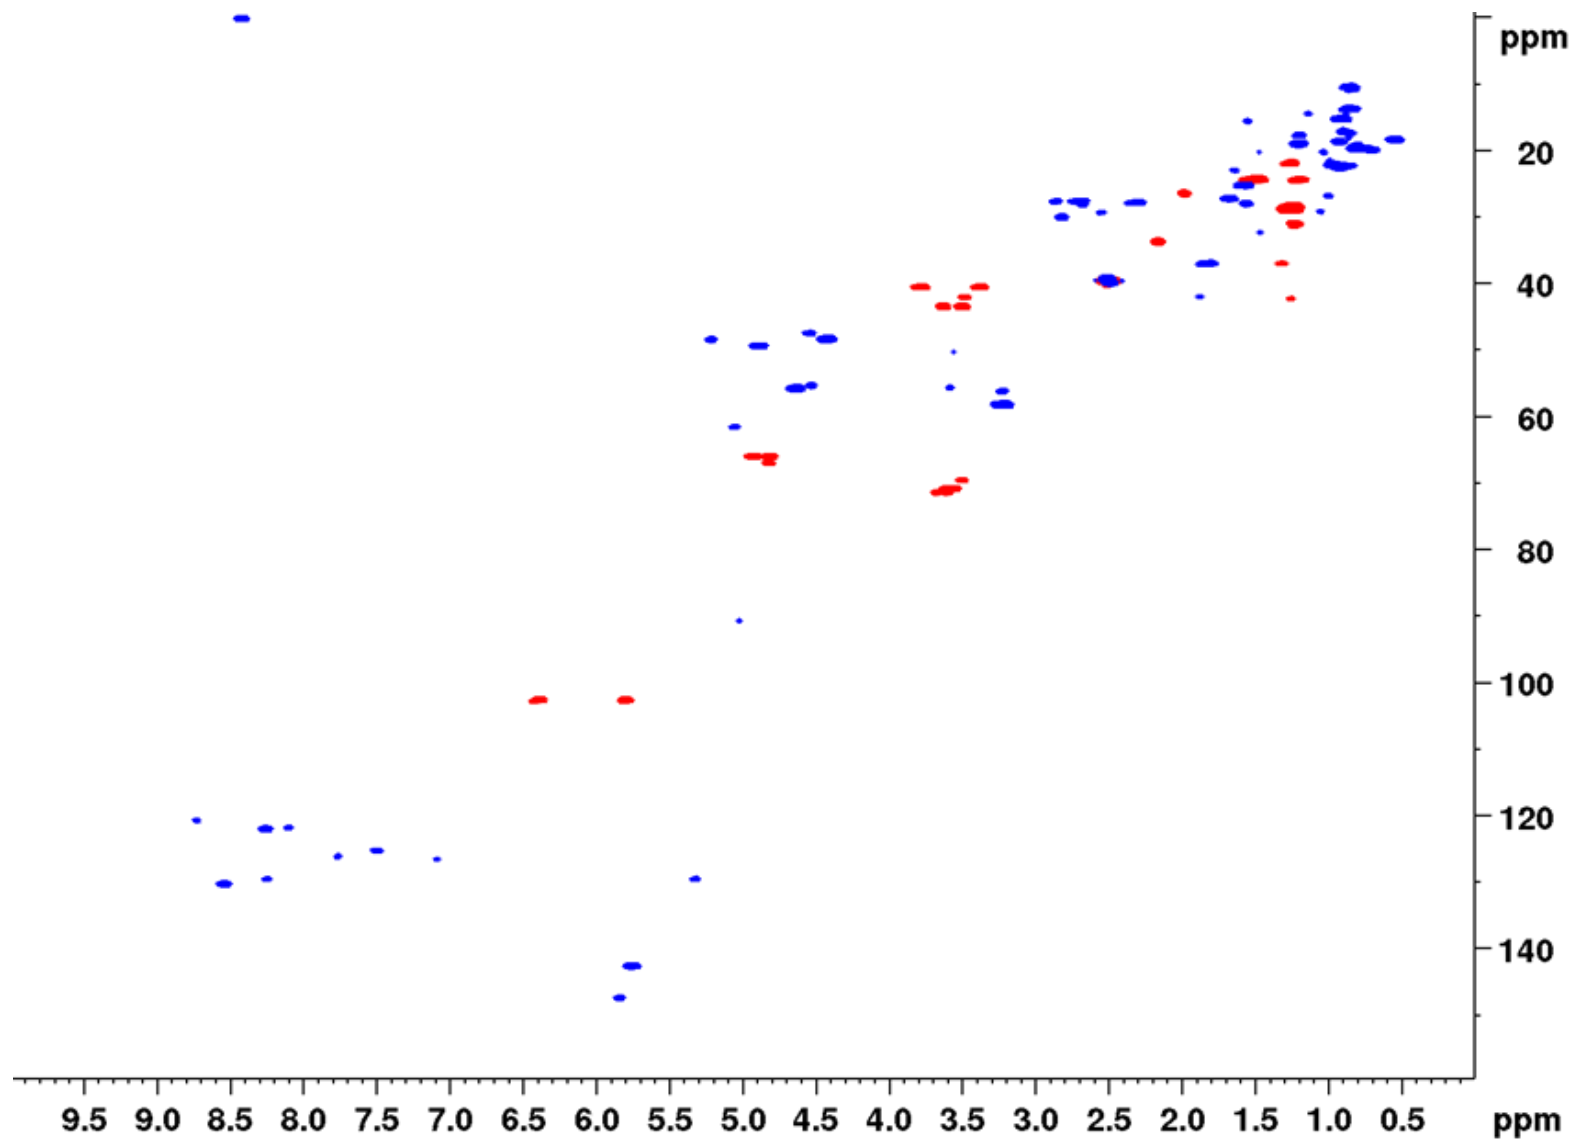

Figure 32 HSQC spectrum of thiamyxin A in DMSO-*d*<sub>6</sub> at 500/125 MHz.

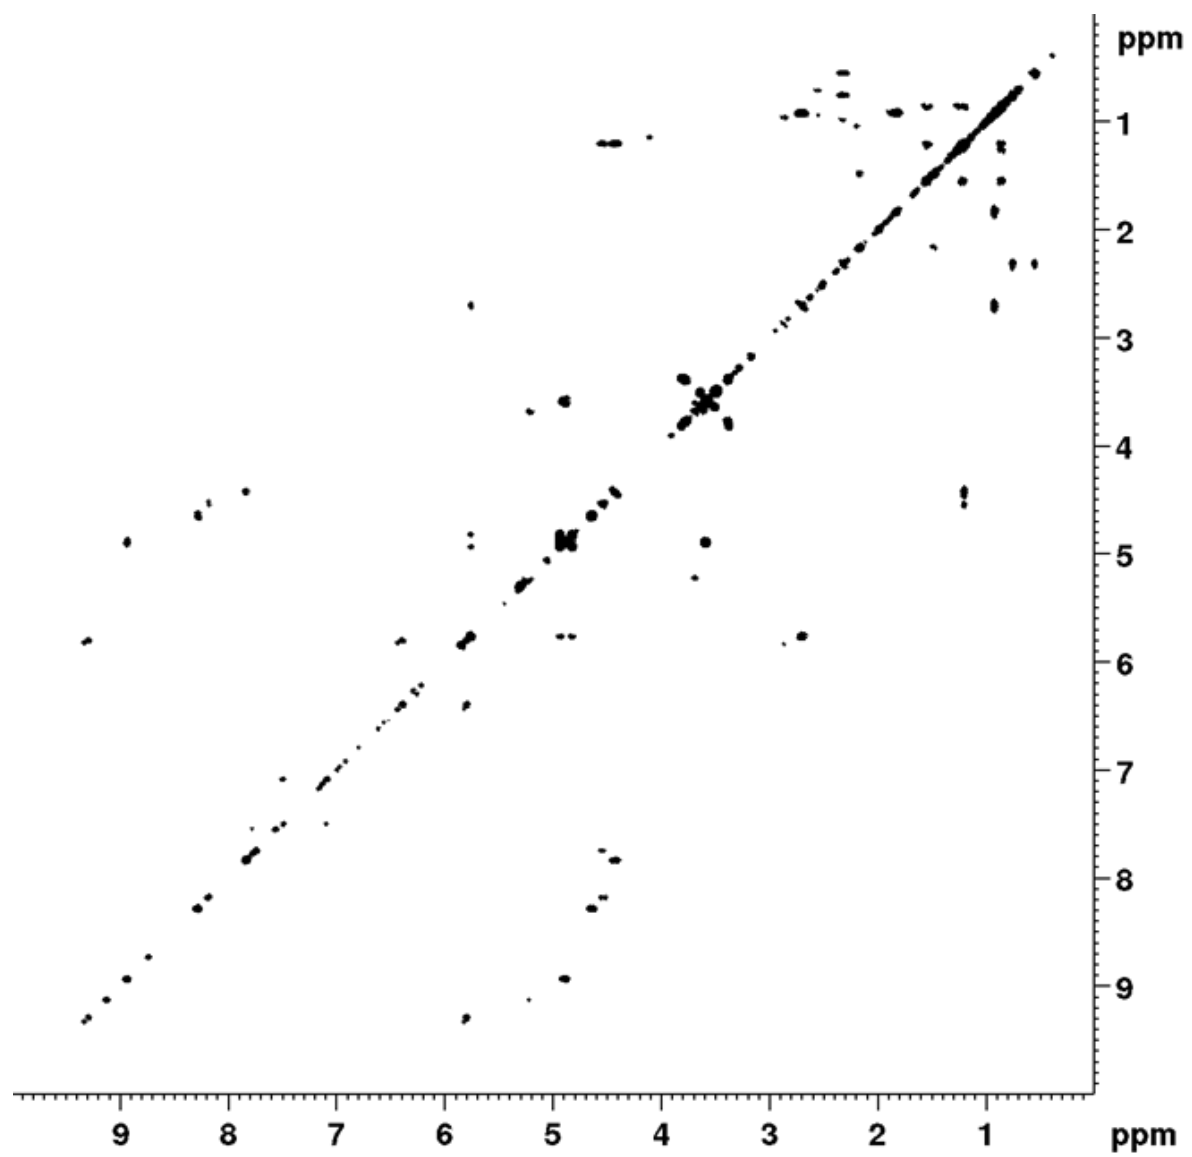

Figure 33 COSY spectrum of thiamyxin A in DMSO- $d_6$  at 500 MHz.

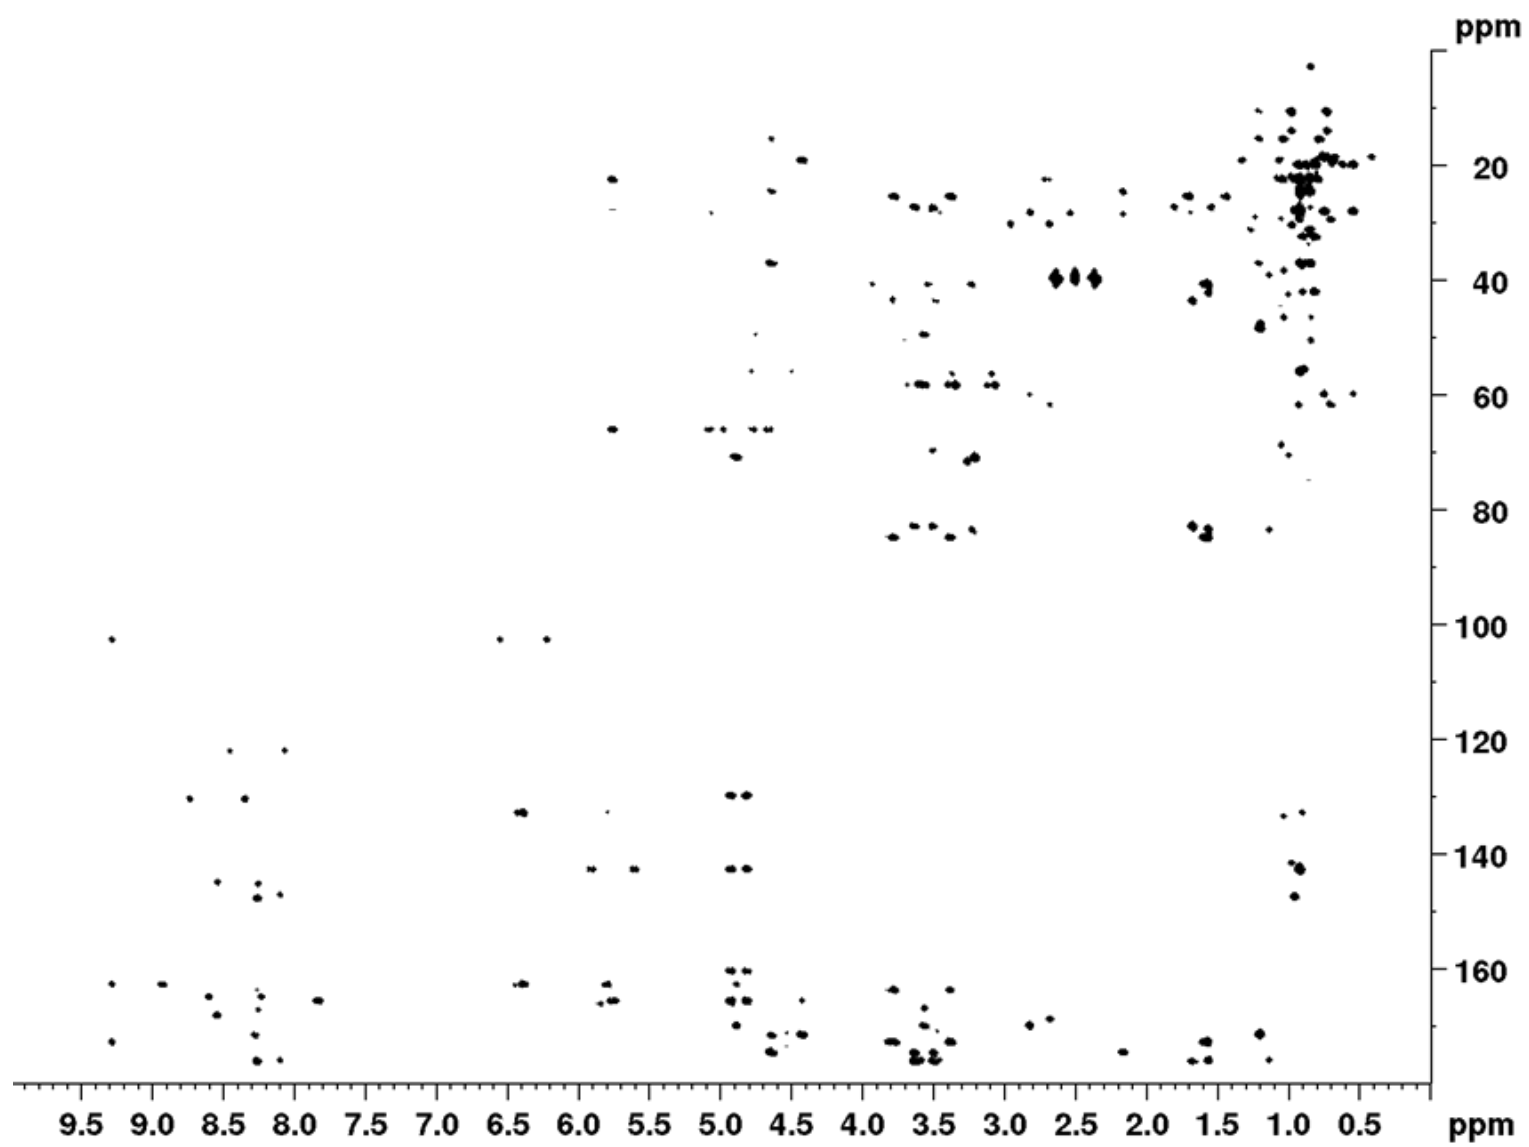

Figure 34 HMBC spectrum of thiamyxin A in DMSO-*d*<sub>6</sub> at 500/125 MHz.

### 2.8.3 Thiamyxin C

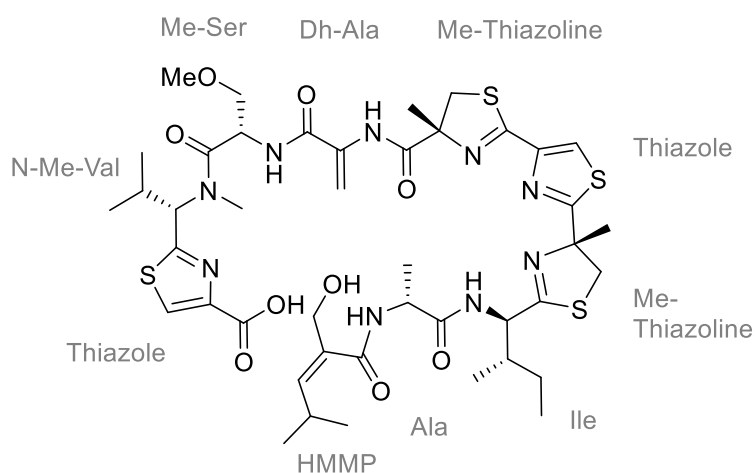

**Table 7** NMR spectroscopic data of thiamyxin C in DMSO- $d_6$  at 700/175 MHz.

| position    | NMR data in DMSO- $d_6^{xx}$ |                         |                   |                      |
|-------------|------------------------------|-------------------------|-------------------|----------------------|
|             | $\delta_C$                   | $\delta_H$ ( $J$ in Hz) | COSY correlations | HMBC correlations    |
| <i>HMMP</i> |                              |                         |                   |                      |
| 1           | 167.6                        | -                       | -                 | -                    |
| 2           | 134.6                        | -                       | -                 | -                    |
| 2'          | 63.1                         | 4.00, m                 | 3                 | 1, 2, 3              |
| 3           | 139.8                        | 5.43, bd (9.8)          | 2', 4             | 1, 2, 2', 4, 4', 5   |
| 4           | 27.3                         | 2.81, m                 | 3, 4', 5          | 2, 3, 4', 5          |
| 4'          | 22.7                         | 0.90, m*                | 4, 5              | 3, 4, 5              |
| 5           | 22.7                         | 0.90, m*                | 4, 4'             | 3, 4, 4'             |
| <i>Ala</i>  |                              |                         |                   |                      |
| 1           | 172.8                        | -                       | -                 | -                    |
| 2           | 47.9                         | 4.52, quin (7.3)        | 3, NH             | 1, 3, <i>HMMP</i> -1 |
| 3           | 18.4                         | 1.30, q (7.4)           | 2                 | 1, 2                 |
| NH          | -                            | 7.98, bs                | 2                 | -                    |
| <i>Ile</i>  |                              |                         |                   |                      |
| 1           | 175.5                        | -                       | -                 | -                    |

|                            |       |                     |          |                               |
|----------------------------|-------|---------------------|----------|-------------------------------|
| 2                          | 54.2  | 4.77, dd (8.9, 4.9) | 3, NH    | 1, 3, 3', 4, <i>Ala</i> -1    |
| 3                          | 37.7  | 2.01, m             | 2, 3', 4 | 2, 3', 4, 5                   |
| 3'                         | 14.4  | 0.92, m*            | 3        | 2, 3, 4, 5                    |
| 4                          | 25.7  | 1.38, 1.20, m*      | 3, 5     | 3', 3, 5                      |
| 5                          | 11.4  | 0.85, t (7.8)       | 4        | 3, 4                          |
| NH                         | -     | 8.27, bd (8.8)      | 2        | <i>Ala</i> -1                 |
| <hr/> <i>Me-thiazoline</i> |       |                     |          |                               |
| 1                          | 176.7 | -                   | -        | -                             |
| 2                          | 83.7  | -                   | -        | -                             |
| 3                          | 43.1  | 3.62, 3.51, m*      | -        | 1, 2, Me, <i>Ile</i> -1       |
| Me                         | 27.4  | 1.64, s             | -        | 1, 2, 3                       |
| <hr/> <i>Thiazole</i>      |       |                     |          |                               |
| 1                          | 163.1 | -                   | -        | -                             |
| 2                          | 147.7 | -                   | -        | -                             |
| 3                          | 122.2 | 8.21, s*            | -        | 2, <i>Me-thiazoline</i> -1    |
| <hr/> <i>Me-thiazoline</i> |       |                     |          |                               |
| 1                          | 172.8 | -                   | -        | -                             |
| 2                          | 85.0  | -                   | -        | -                             |
| 3                          | 40.4  | 3.39, 3.76, m*      | -        | 1, 2, Me, <i>Thiazole</i> -1  |
| Me                         | 25.9  | 1.54, s             | -        | 1, 2, 3                       |
| <hr/> <i>Dh-Ala</i>        |       |                     |          |                               |
| 1                          | 163.1 | -                   | -        | -                             |
| 2                          | 133.2 | -                   | -        | -                             |
| 3                          | 103.0 | 6.37, 5.79, s       | NH       | 1, 2                          |
| NH                         | -     | 9.30, s             | 3        | 1, 3, <i>Me-Thiazoline</i> -1 |
| <hr/> <i>Me-Ser</i>        |       |                     |          |                               |

|                       |       |                 |          |                       |
|-----------------------|-------|-----------------|----------|-----------------------|
| 1                     | 170.0 | -               | -        | -                     |
| 2                     | 50.0  | 4.89, m*        | 3, NH    | 1, 3, <i>Dh-Ala-1</i> |
| 3                     | 70.8  | 3.56, m         | 2        | 1, 3, OMe             |
| OMe                   | 58.3  | 3.19, s         | -        | 3                     |
| NH                    | -     | 8.85, t (7.8)   | 2        | 3, <i>Dh-Ala-1</i>    |
| <hr/> <i>N-Me-Val</i> |       |                 |          |                       |
| 1                     | 172.2 | -               | -        | -                     |
| 2                     | 59.8  | 5.36, bd (10.6) | 3        | n.d.                  |
| 3                     | 27.9  | 2.46, m         | 2, 3', 4 | n.d.                  |
| 3'                    | 18.9  | 0.72, t (7.8)   | 4        | 2, 3, 4               |
| 4                     | 20.0  | 0.82, m*        | 3'       | 2, 3, 3'              |
| NMe                   | 29.8  | 2.92, s         | -        | 2, <i>Me-Ser-1</i>    |
| <hr/> <i>Thiazole</i> |       |                 |          |                       |
| 1                     | 176.4 | -               | -        | -                     |
| 2                     | 147.7 | -               | -        | -                     |
| 3                     | 122.3 | 8.19, s         | -        | 1, 2                  |

<sup>xx</sup> main diastereoisomer (*D-allo-Ile* carrying derivative) was analyzed

\* overlapping signals circumvent exact assignment

n.d. = not detectable

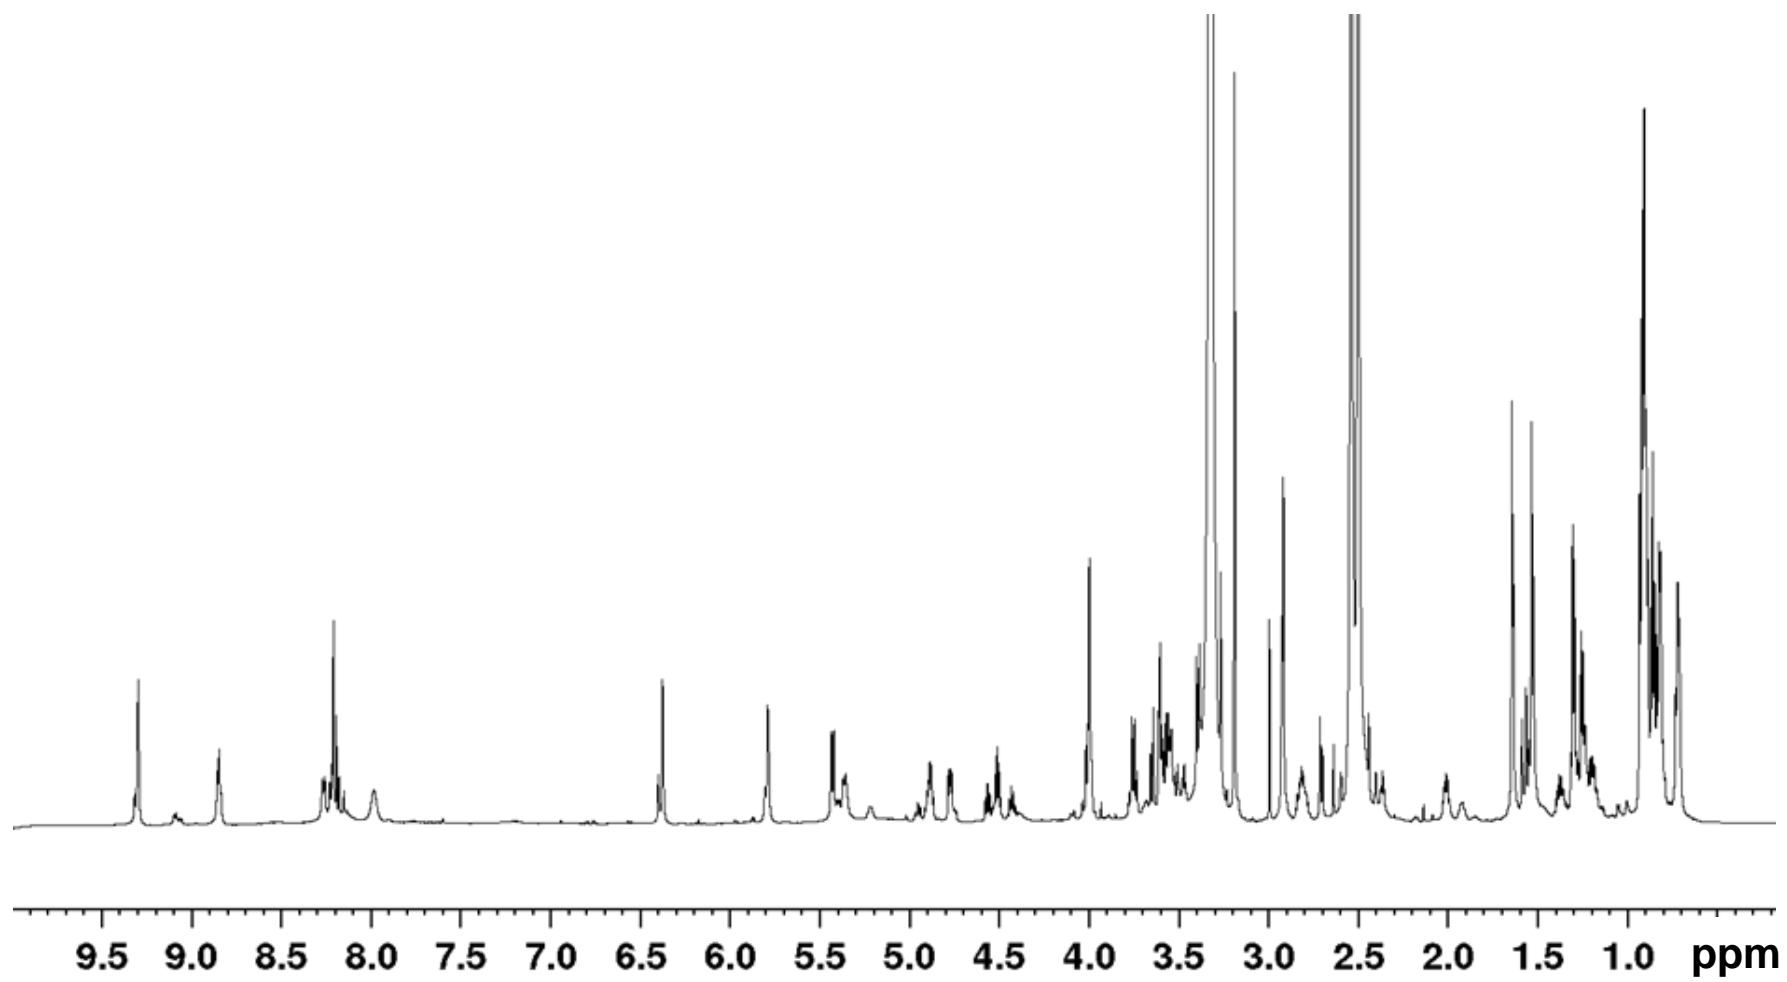

Figure 35  $^1\text{H}$  spectrum of thiamyxin C in  $\text{DMSO-}d_6$  at 700 MHz.



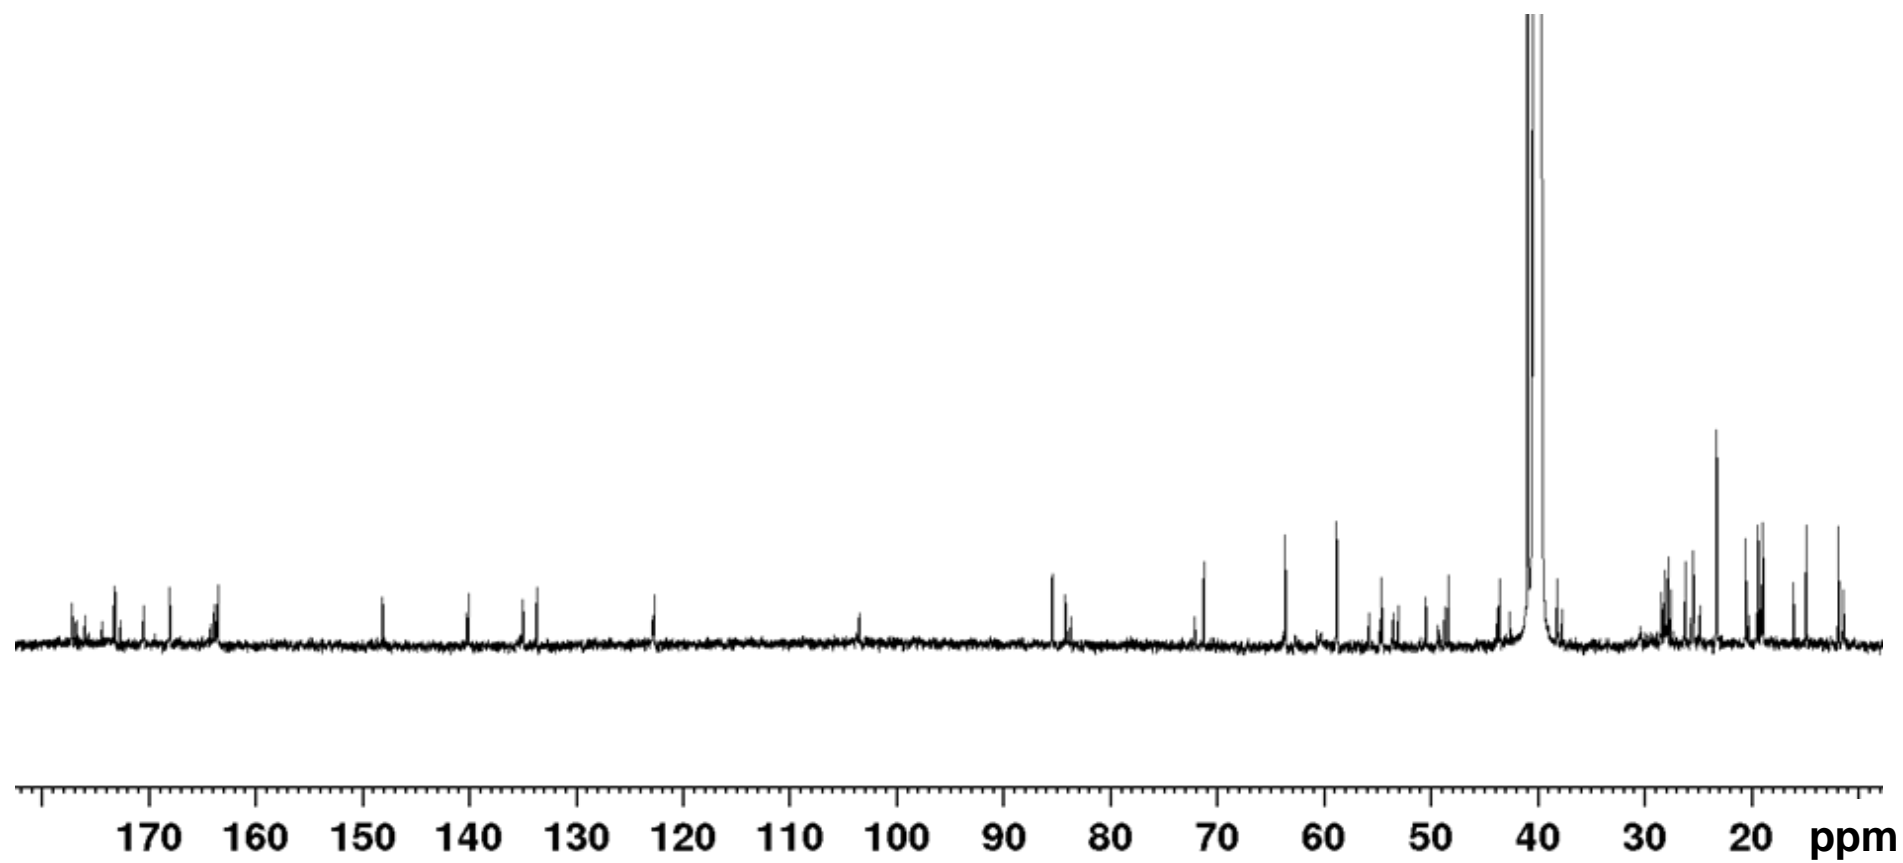

Figure 36  $^{13}\text{C}$  spectrum of thiamyxin C in  $\text{DMSO-}d_6$  at 175 MHz.

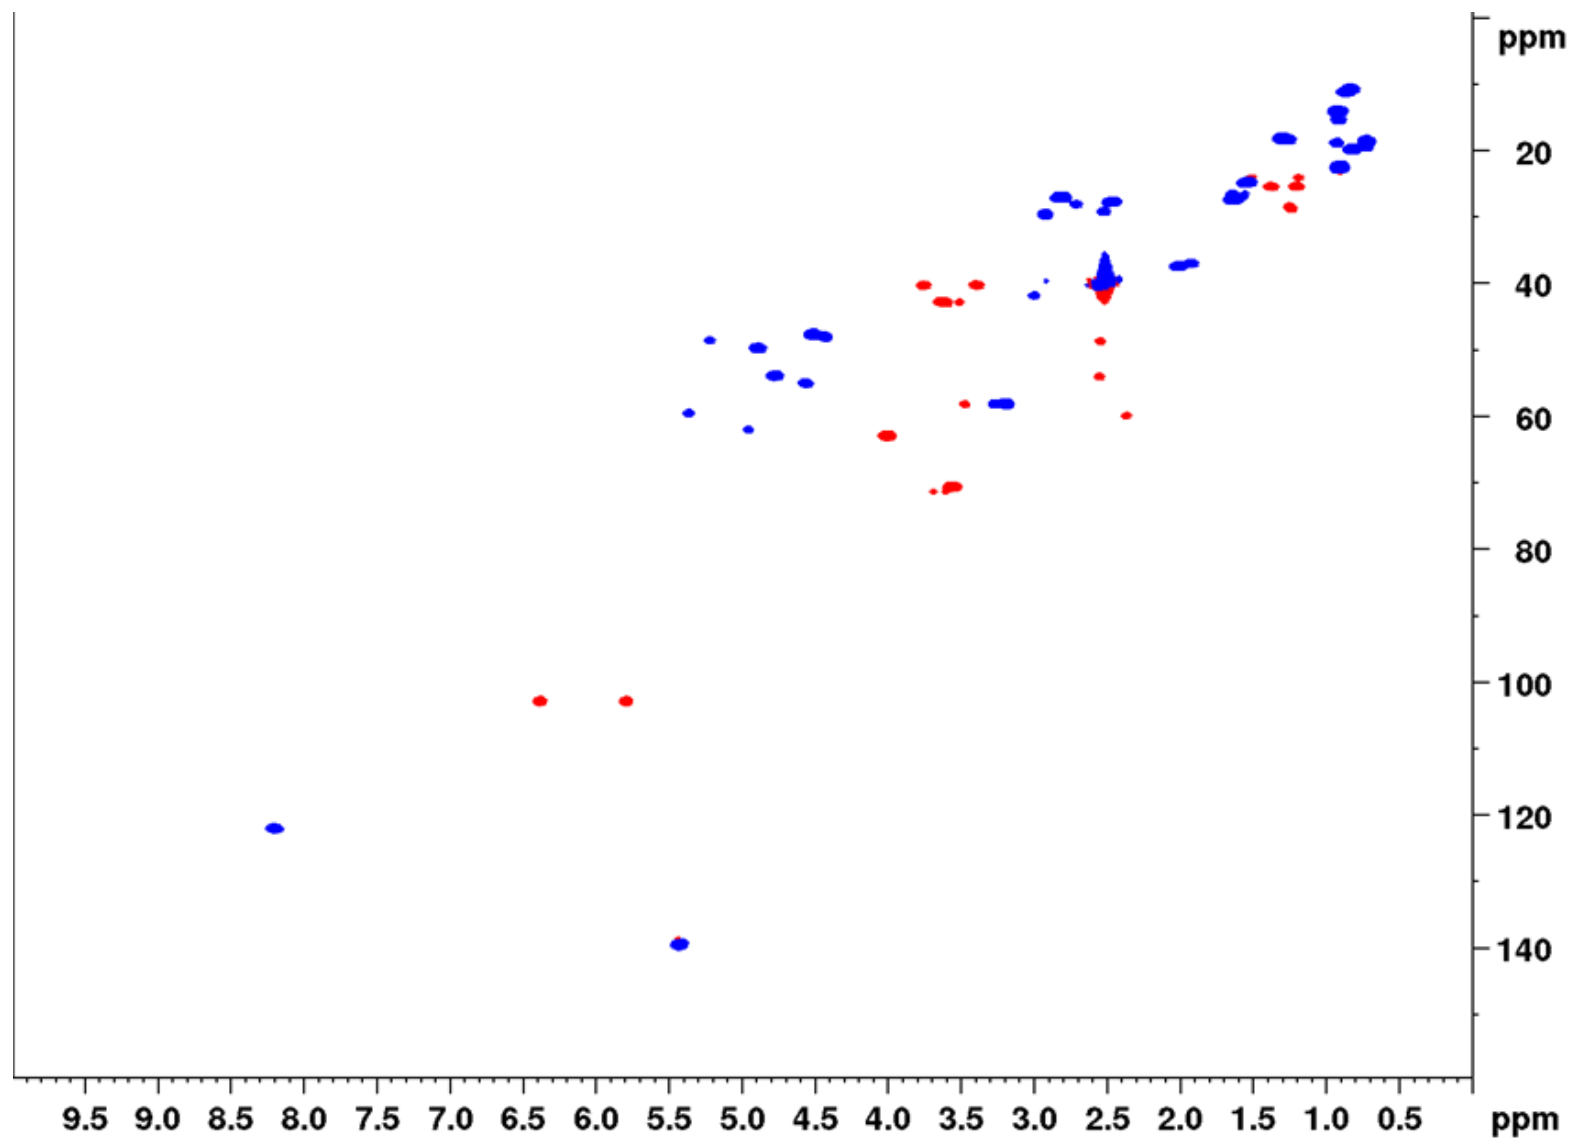

Figure 37 HSQC spectrum of thiamyxin C in DMSO-*d*<sub>6</sub> at 700/175 MHz.

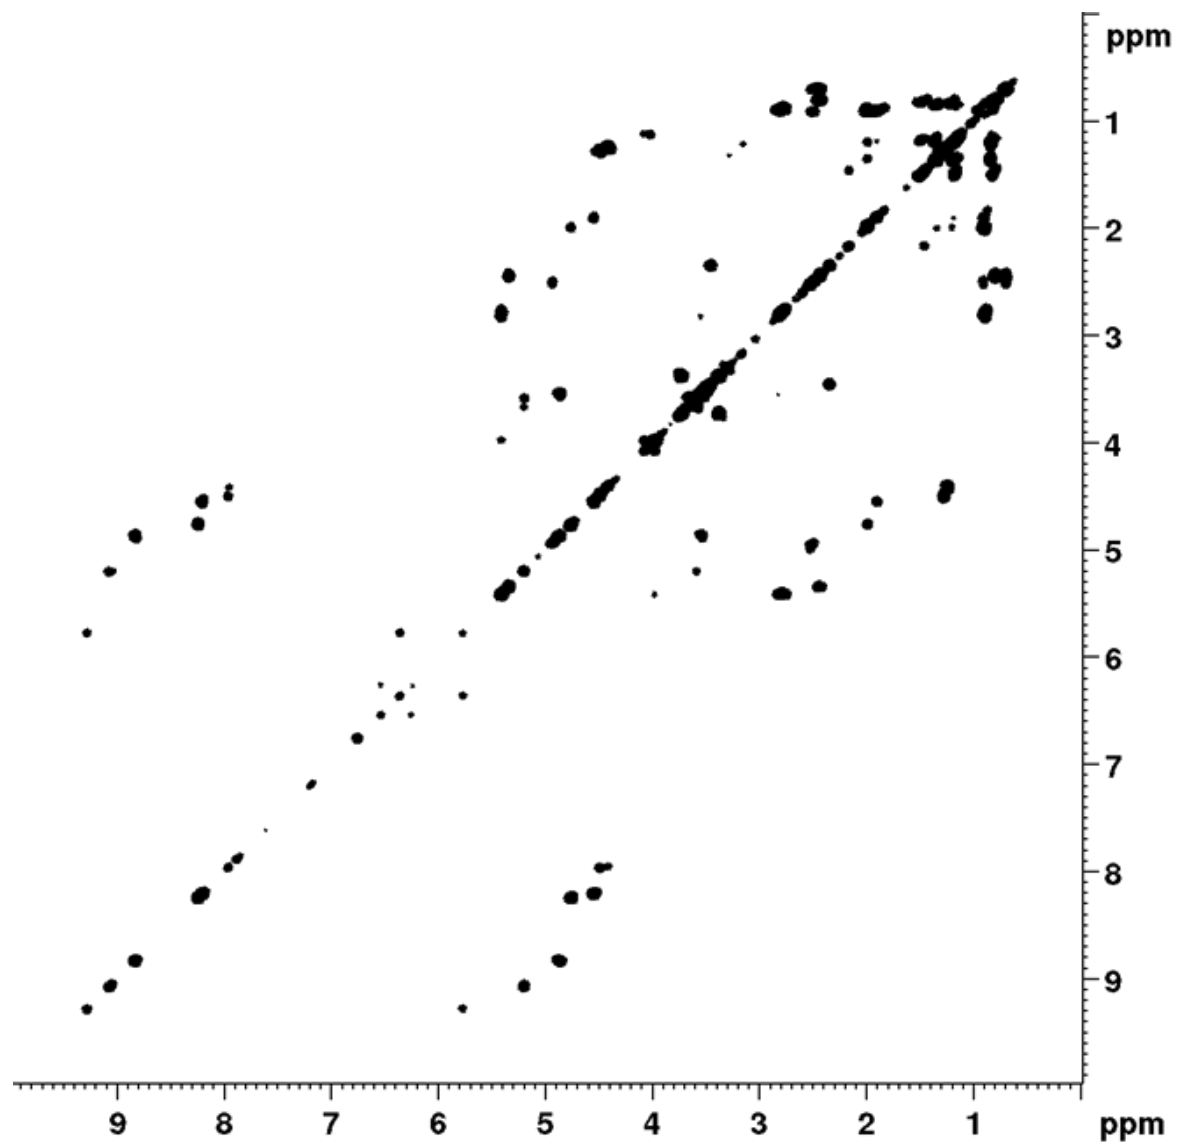

Figure 38 COSY spectrum of thiamyxin C in DMSO- $d_6$  at 700 MHz.

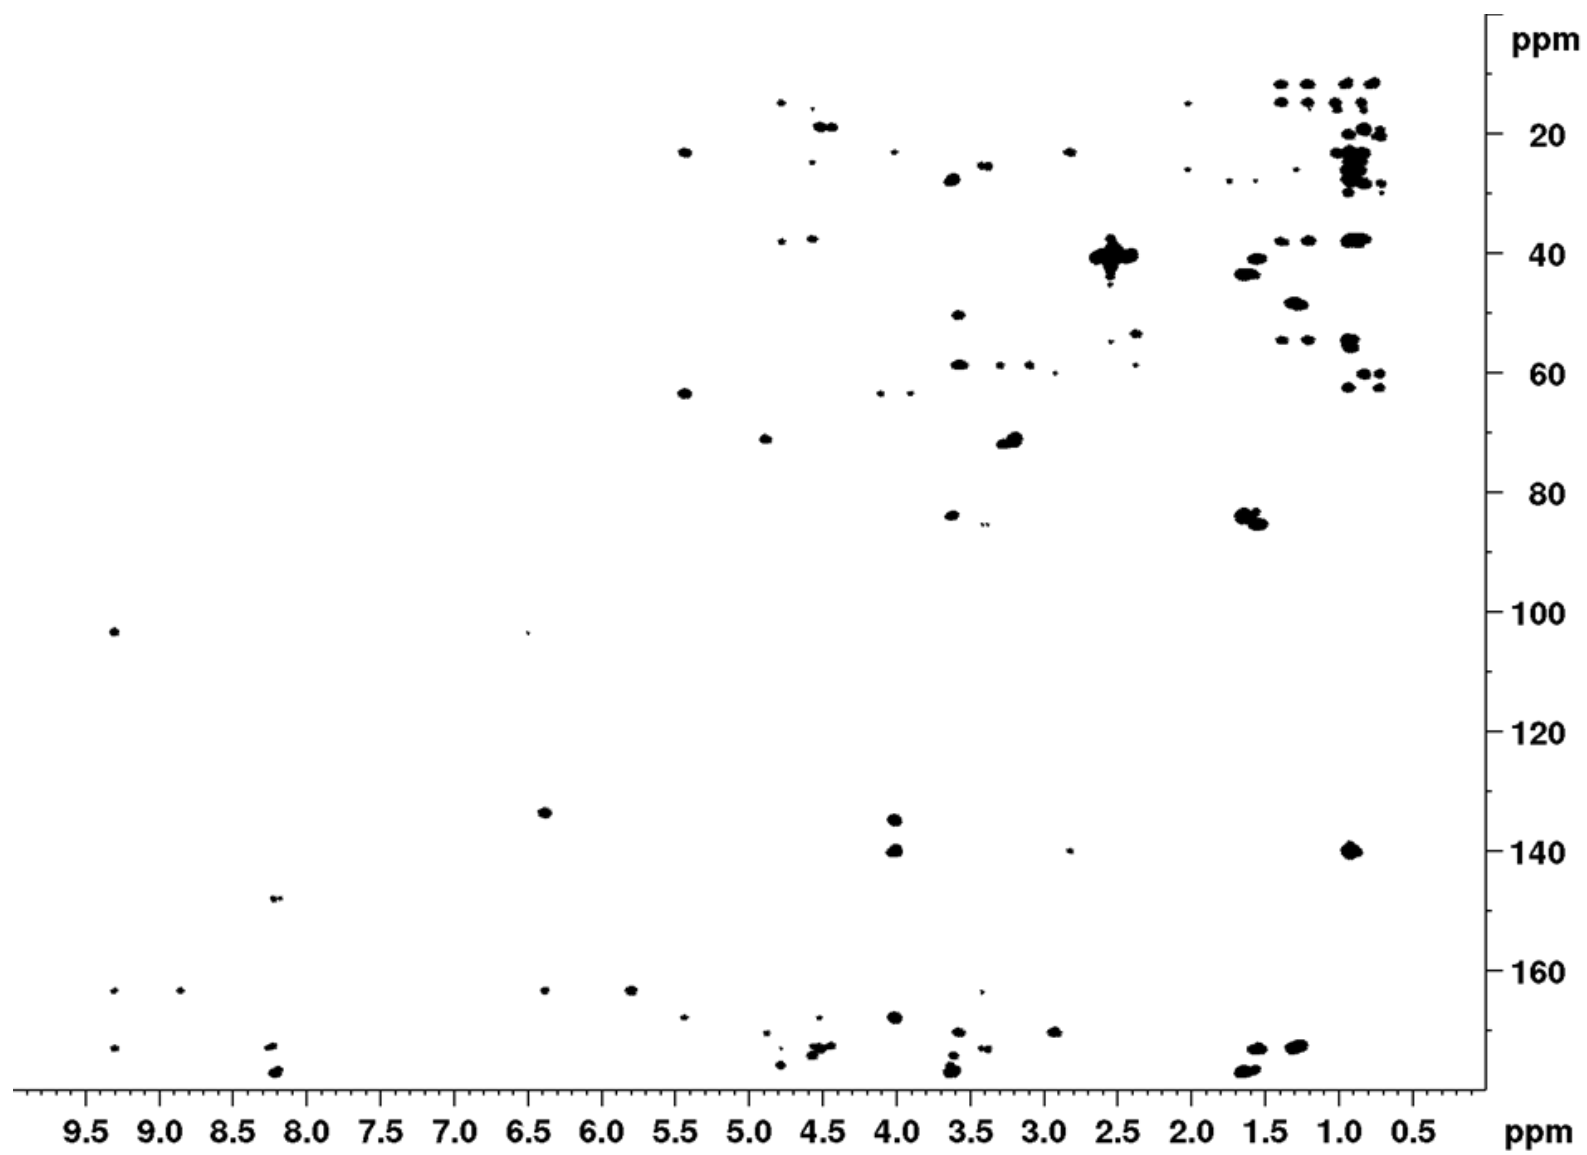

Figure 39 HMBC spectrum of thiamyxin C in DMSO-*d*<sub>6</sub> at 700/175 MHz.

### 2.8.4 Thiamyxin D

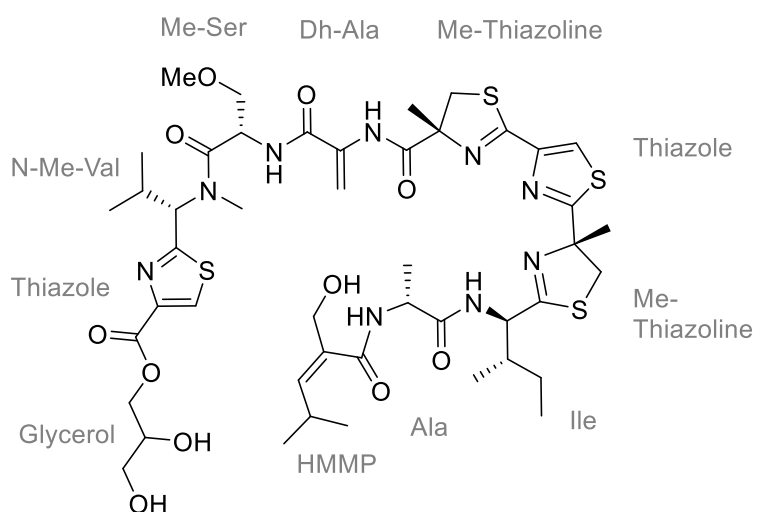

**Table 8** NMR spectroscopic data of thiamyxin D in DMSO-*d*<sub>6</sub> at 700/175 MHz.

| position    | NMR data in DMSO- <i>d</i> <sub>6</sub> |                              |                   |                      |
|-------------|-----------------------------------------|------------------------------|-------------------|----------------------|
|             | $\delta_C$                              | $\delta_H$ ( <i>J</i> in Hz) | COSY correlations | HMBC correlations    |
| <i>HMMP</i> |                                         |                              |                   |                      |
| 1           | 167.2                                   | -                            | -                 | -                    |
| 2           | 134.2                                   | -                            | -                 | -                    |
| 2'          | 63.0                                    | 4.00, s                      | 3                 | 1, 2, 3              |
| 3           | 139.5                                   | 5.45, bd (9.7)               | 2', 4             | 1, 2, 2', 4, 4', 5   |
| 4           | 27.0                                    | 2.83, m                      | 3, 4', 5          | 2, 3, 4', 5          |
| 4'          | 22.4                                    | 0.91, m*                     | 4, 5              | 3, 4, 5              |
| 5           | 22.4                                    | 0.91, m*                     | 4, 4'             | 3, 4, 4'             |
| <i>Ala</i>  |                                         |                              |                   |                      |
| 1           | 172.6                                   | -                            | -                 | -                    |
| 2           | 47.6                                    | 4.51, quin (7.3)             | 3, NH             | 1, 3, <i>HMMP</i> -1 |
| 3           | 18.0                                    | 1.29, m*                     | 2                 | 1, 2                 |
| NH          | -                                       | 7.85, bd (7.4)               | 2                 | -                    |
| <i>Ile</i>  |                                         |                              |                   |                      |
| 1           | 175.0                                   | -                            | -                 | -                    |

|    |      |                |          |                    |
|----|------|----------------|----------|--------------------|
| 2  | 53.8 | 4.76, m*       | 3, NH    | 1, 3, 3', 4, Ala-1 |
| 3  | 37.4 | 2.00, m        | 2, 3', 4 | 2, 3', 4, 5        |
| 3' | 16.4 | 0.90, m*       | 3        | 2, 3, 4, 5         |
| 4  | 25.4 | 1.37, 1.21, m* | 3, 5     | 3', 3, 5           |
| 5  | 11.0 | 0.89, m*       | 4        | 3, 4               |
| NH | -    | 8.21, m*       | 2        | Ala-1              |

---

*Me-thiazoline*

|    |       |                |   |                 |
|----|-------|----------------|---|-----------------|
| 1  | 176.6 | -              | - | -               |
| 2  | 89.8  | -              | - | -               |
| 3  | 42.8  | 3.62, 3.51, m* | - | 1, 2, Me, Ile-1 |
| Me | 22.1  | 1.14, s        | - | 1, 2, 3         |

---

*Thiazole*

|   |       |          |   |                    |
|---|-------|----------|---|--------------------|
| 1 | 163.1 | -        | - | -                  |
| 2 | 147.3 | -        | - | -                  |
| 3 | 121.9 | 8.19, s* | - | 2, Me-thiazoline-1 |

---

*Me-thiazoline*

|    |       |                |   |                      |
|----|-------|----------------|---|----------------------|
| 1  | 172.6 | -              | - | -                    |
| 2  | 84.8  | -              | - | -                    |
| 3  | 40.4  | 3.40, 3.75, m* | - | 1, 2, Me, Thiazole-1 |
| Me | 24.7  | 1.07, s        | - | 1, 2, 3              |

---

*Dh-Ala*

|    |       |               |    |                       |
|----|-------|---------------|----|-----------------------|
| 1  | 162.7 | -             | -  | -                     |
| 2  | 132.9 | -             | -  | -                     |
| 3  | 102.8 | 6.38, 5.78, s | NH | 1, 2                  |
| NH | -     | 9.30, s       | 3  | 1, 3, Me-Thiazoline-1 |

---

*Me-Ser*

|                 |       |                 |          |                                   |
|-----------------|-------|-----------------|----------|-----------------------------------|
| 1               | 169.8 | -               | -        | -                                 |
| 2               | 49.7  | 4.88, m*        | 3, NH    | 1, 3, <i>Dh-Ala-1</i>             |
| 3               | 70.7  | 3.49, 3.65, m   | 2        | 1, 3, OMe                         |
| OMe             | 58.0  | 3.19, s         | -        | 3                                 |
| NH              | -     | 8.84, t (7.8)   | 2        | 3, <i>Dh-Ala-1</i>                |
| <hr/>           |       |                 |          |                                   |
| <i>N-Me-Val</i> |       |                 |          |                                   |
| 1               | 168.0 | -               | -        | -                                 |
| 2               | 59.5  | 5.41, bd (10.8) | 3        | 1, 3, 3', 4, NMe, <i>Me-Ser-1</i> |
| 3               | 27.7  | 2.47, m*        | 2, 3', 4 | 1, 2, 3', 4                       |
| 3'              | 18.7  | 0.76, s         | 4        | 2, 3, 4                           |
| 4               | 19.8  | 0.86, m*        | 3'       | 2, 3, 3'                          |
| NMe             | 29.8  | 2.94, s         | -        | 1, 2, <i>Me-Ser-1</i>             |
| <hr/>           |       |                 |          |                                   |
| <i>Thiazole</i> |       |                 |          |                                   |
| 1               | 160.4 | -               | -        | -                                 |
| 2               | 145.1 | -               | -        | -                                 |
| 3               | 129.8 | 8.52, s         | -        | 1, 2, <i>N-Me-Val-1</i>           |
| <hr/>           |       |                 |          |                                   |
| <i>Glycerol</i> |       |                 |          |                                   |
| 1               | 66.1  | 4.16, 4.28      | 2        | 2, 3, <i>Thiazole-1</i>           |
| 2               | 69.2  | 3.76            | 1, 3     | 1, 3                              |
| 3               | 62.3  | 3.41            | 2        | 1, 2                              |

\* overlapping signals circumvent exact assignment

n.d. = not detectable

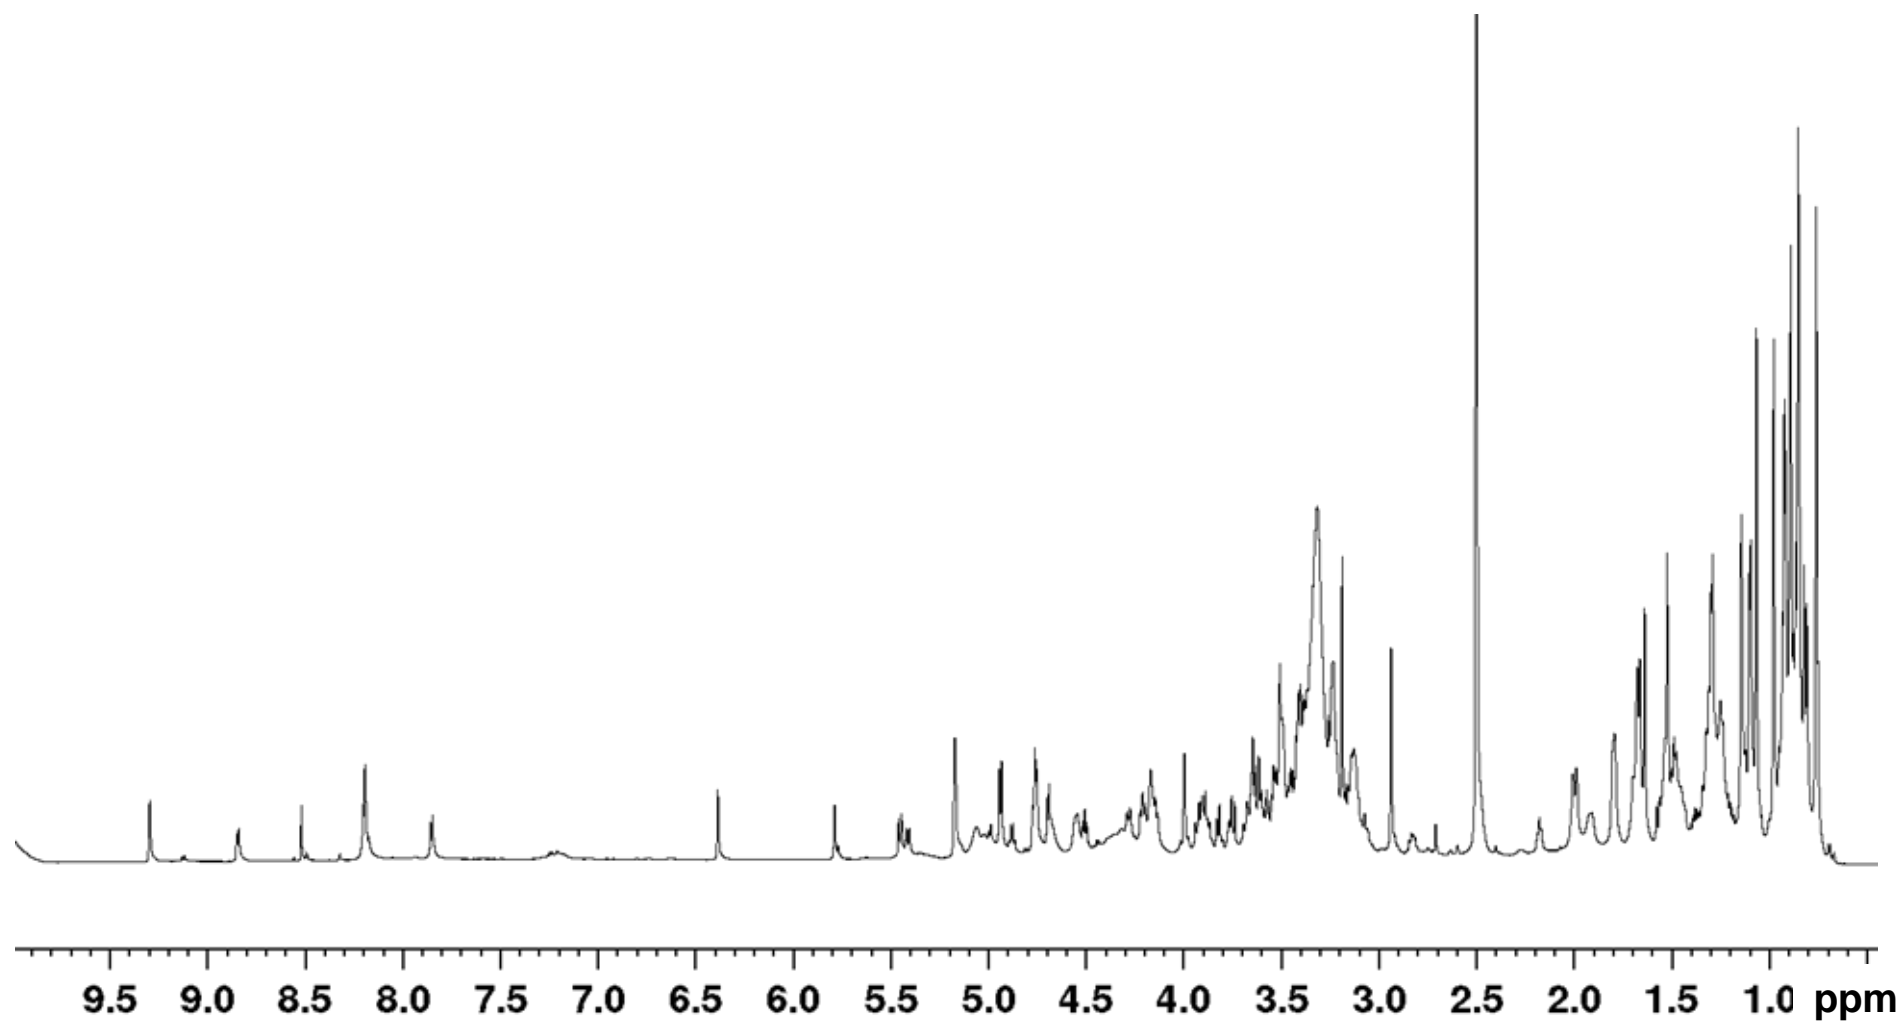

Figure 40  $^1\text{H}$  spectrum of thiamyxin D in  $\text{DMSO-}d_6$  at 700 MHz.



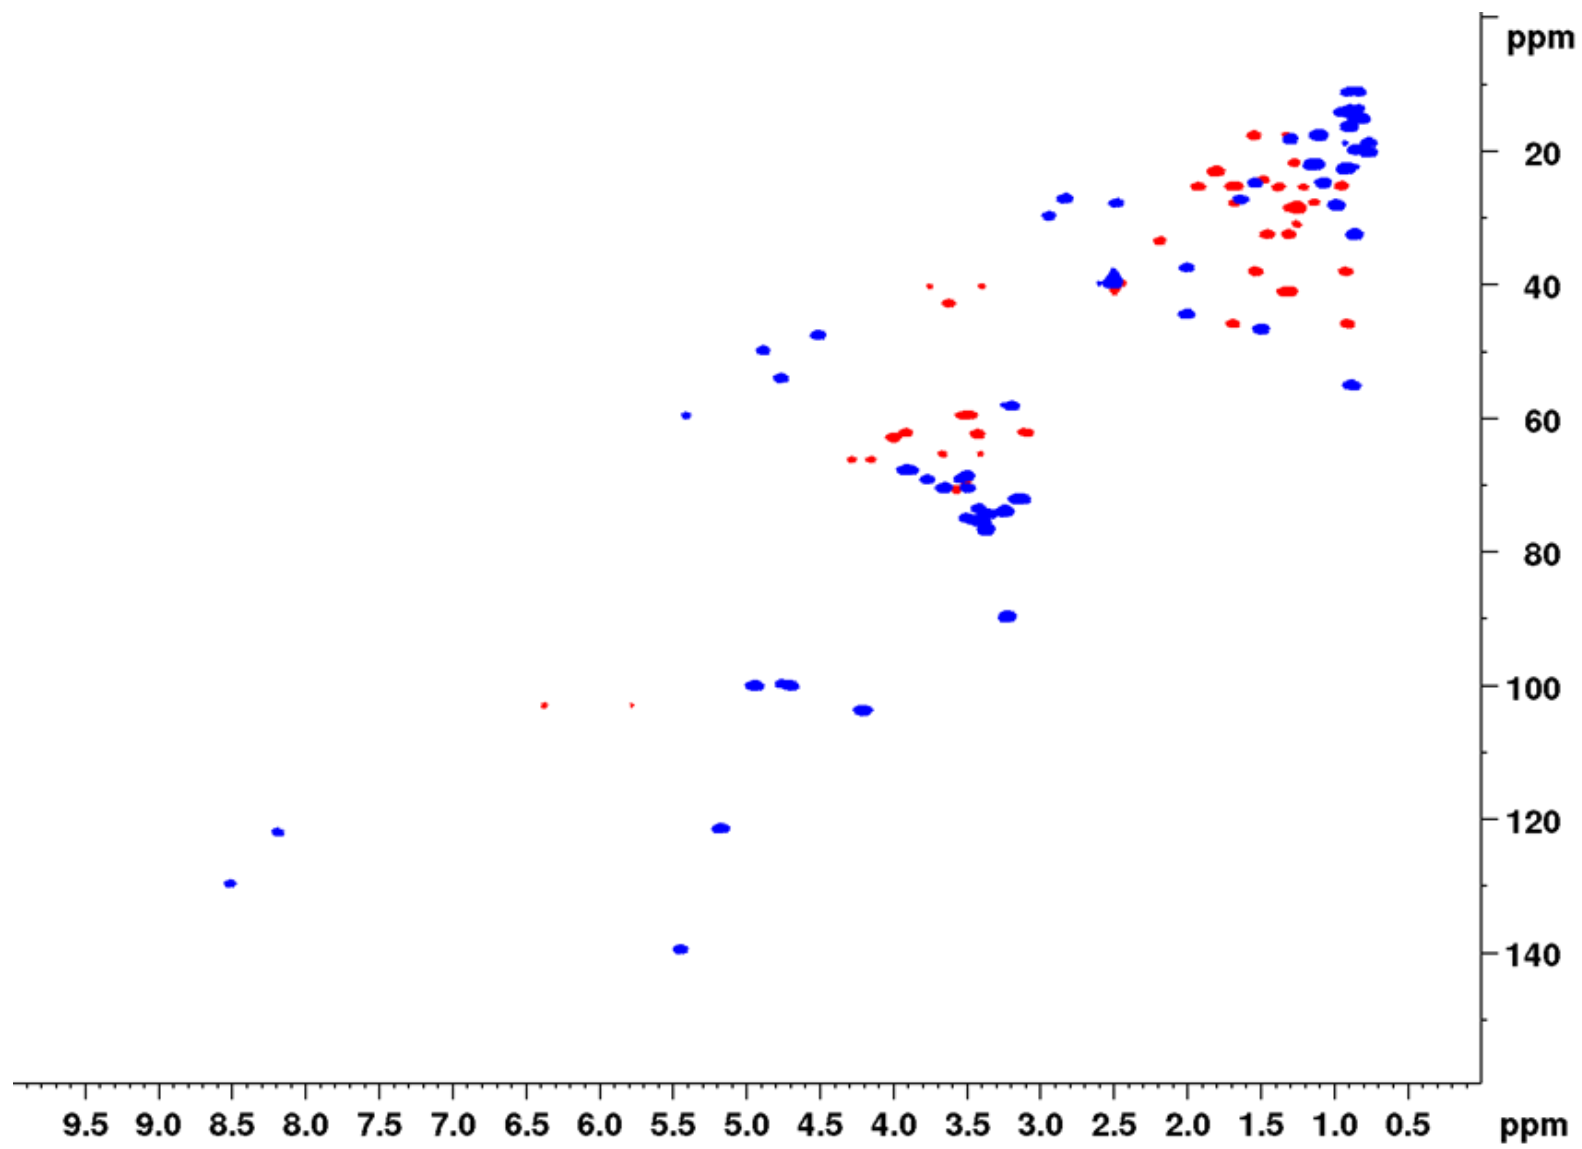

Figure 41 HSQC spectrum of thiamyxin D in DMSO-*d*<sub>6</sub> at 700/175 MHz.

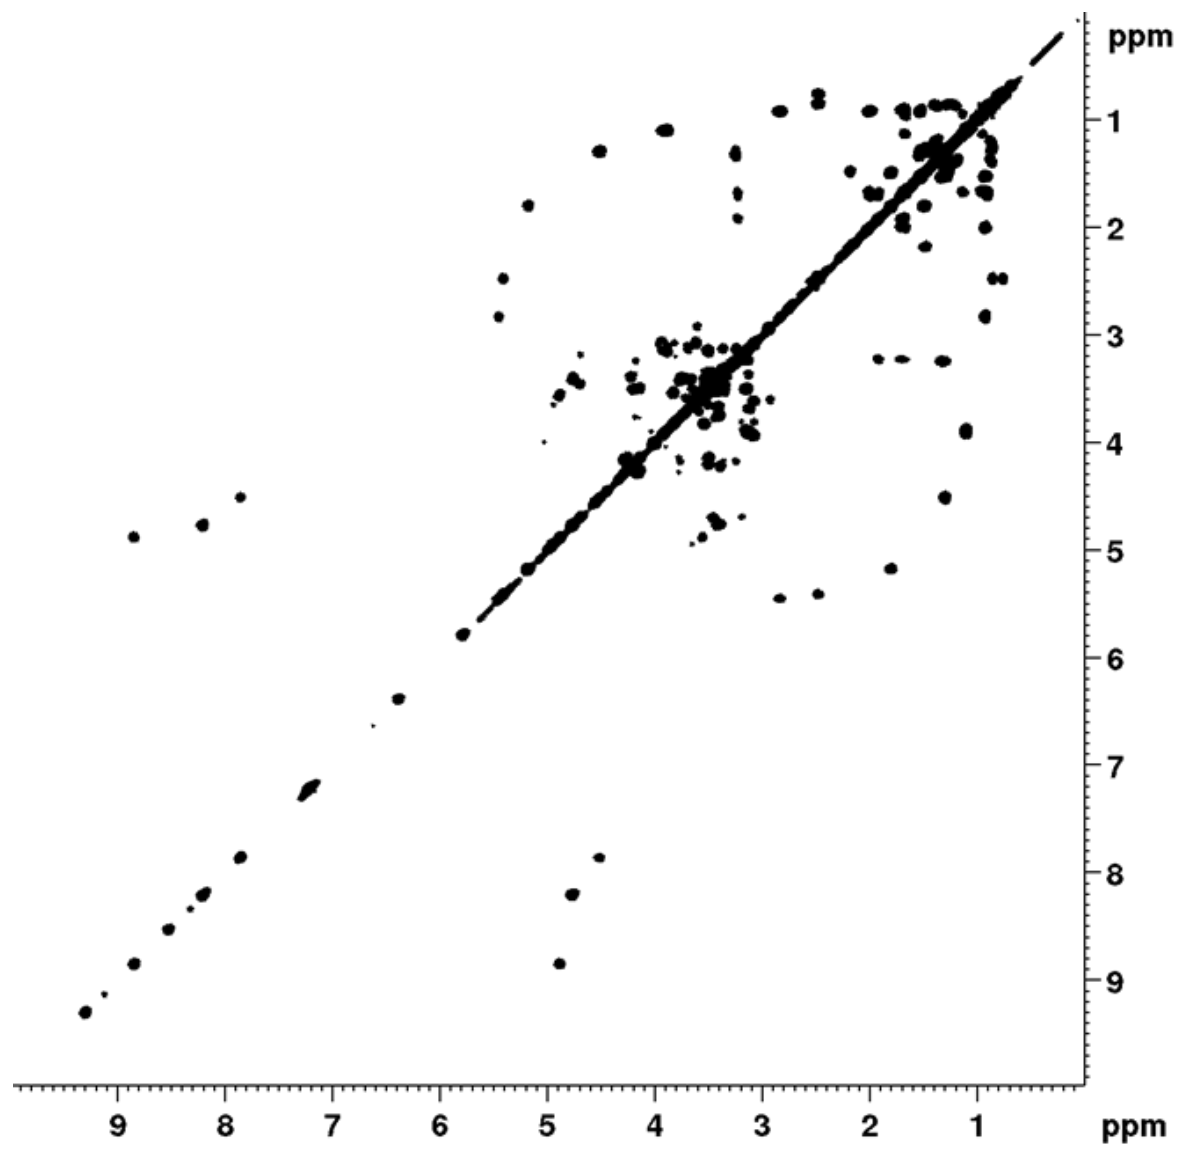

Figure 42 COSY spectrum of thiamyxin D in DMSO- $d_6$  at 700 MHz.

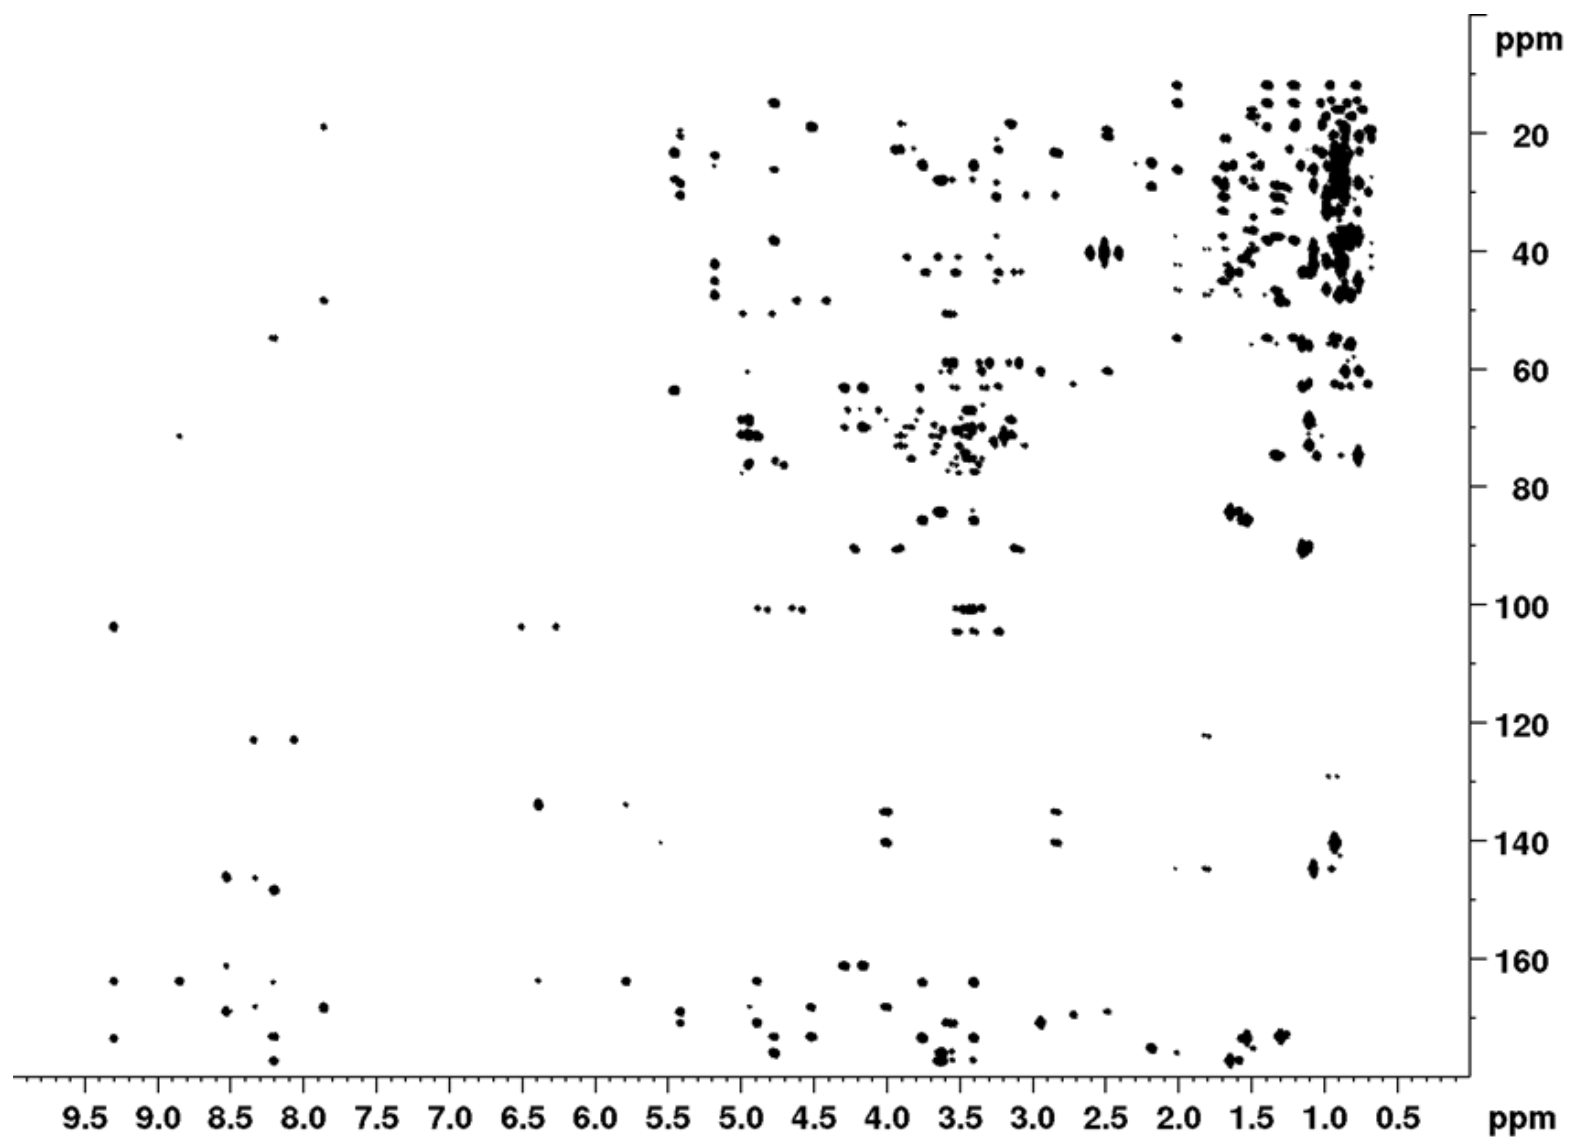

Figure 43 HMBC spectrum of thiamyxin D in DMSO-*d*<sub>6</sub> at 700/175 MHz.

### 3 References

- [1] S. H. E. van den Worm, K. K. Eriksson, J. C. Zevenhoven, F. Weber, R. Züst, T. Kuri, R. Dijkman, G. Chang, S. G. Siddell, E. J. Snijder, V. Thiel, A. D. Davidson, *PLoS ONE* **2012**, *7*, e32857.
- [2] C. D. Bader, F. Panter, R. Garcia, E. P. Tchesnokov, S. Haid, C. Walt, C. Spröer, A. F. Kiefer, M. Götte, J. Overmann, T. Pietschmann, R. Müller, *Chemistry – A European Journal* **2022**, *28*, e202104484.
- [3] Okoth Dorothy A, J. J. Hug, R. Garcia, C. Spröer, J. Overmann, R. Müller, *Molecules (Basel, Switzerland)* **2020**, *25*, 2676.
- [4] Z. J. Anderson, C. Hobson, R. Needley, L. Song, M. S. Perryman, P. Kerby, D. J. Fox, *Org. Biomol. Chem.* **2017**, *15*, 9372–9378.
- [5] a) K. Fujii, Y. Ikai, T. Mayumi, H. Oka, M. Suzuki, K. Harada, *Anal. Chem.* **1997**, *69*, 3346–3352; b) R. Bhushan, H. Bruckner, *Amino Acids* **2004**, *27*, 231–247;
- [6] P. Wipf, P. C. Fritch, *Tetrahedron Lett.* **1994**, *35*, 5397–5400.
- [7] K. Blin, S. Shaw, K. Steinke, R. Villebro, N. Ziemert, S. Y. Lee, M. H. Medema, T. Weber, *Nucleic Acids Res.* **2019**, W81-W87.
- [8] S. F. Altschul, W. Gish, W. Miller, E. W. Myers, D. J. Lipman, *J. Mol. Biol.* **1990**, *215*, 403–410.
- [9] S. Lu, J. Wang, F. Chitsaz, M. K. Derbyshire, R. C. Geer, N. R. Gonzales, M. Gwadz, Di Hurwitz, G. H. Marchler, J. S. Song, N. Thanki, R. A. Yamashita, M. Yang, D. Zhang, C. Zheng, C. J. Lanczycki, A. Marchler-Bauer, *Nucleic Acids Res.* **2020**, *48*, D265-D268.
- [10] M. A. Skiba, C. L. Tran, Q. Dan, A. P. Sikkema, Z. Klaver, W. H. Gerwick, D. H. Sherman, J. L. Smith, *Structure* **2020**, *28*, 63-74.e4.
- [11] D. Pogorevc, Y. Tang, M. Hoffmann, G. Zipf, H. S. Bernauer, A. Popoff, H. Steinmetz, S. C. Wenzel, *ACS Synth. Biol.* **2019**, *8*, 1121–1133.
- [12] C. Rausch, I. Hoof, T. Weber, W. Wohlleben, D. H. Huson, *BMC Evol. Biol.* **2007**, *7*, 78–92.
